# Supplementary material for: Albuminoid Genes: Evolving at the Interface of Dispensability and Selection
Source: PubMed Central journal article supplement (PMC4255767; doi:10.1093/gbe/evu235), 2014-10-27
Supplement: supp_evu235_Supplementary.pdf [file supp_evu235_Supplementary.pdf]

Figure S1. Multiple sequence alignments

ALBUMIN

Human MKWVTFISLLFLFSSAYSRGVFRDRAHKSEVAHRFKDLGEEENFKALVLI AFAQYLQCCPF  
Chimpanzee MKWVTFISLLFLFSSAYSRGVFRDRAHKSEVAHRFKDLGEEENFKALVLI AFAQYLQCCPF  
Bonobo MKWVTFISLLFLFSSAYSRGVFRDRAHKSEVAHRFKDLGEEENFKALVLI AFAQYLQCCPF  
Gorilla MKWVTFISLLFLFSSAYSRGVFRDRAHKSEVAHRFKDLGEEETFKALVLI AFAQYLQCCPF  
Orangutan MKWVTFISLLFLFSSAYSRGVFRDRAHKSEVAHRFKDLGEEKFKALVLI AFAQYLQCCPF  
Gibbon MKWVTFISLLLLFSSAYSRGVFRDRAHKSEIAHRFKDLGEEENFKALVLI AFAQYLQCCPF  
Rhesus MKWVTFISLLFLFSSAYSRGVFRDTHKSEVAHRFKDLGEEHFKGLVLI AFSQYLQCCPF  
Crab-eating macaque MKWVTFISLLFLFSSAYSRGVFRDTHKSEVAHRFKDLGEEHFKGLVLI AFSQYLQCCPF  
Olive baboon MKWVTFISLLFLFSSAYSRGVFRDRAHKSEVAHRFKDLGEEHFKGL-----  
Marmoset MKWVTFISLLFLFSSAYSRGVFRDRAHKSEVAHRFKDLGEEHFKDLVLPFSQYLQCCPF  
Squirrel monkey MKWVTFISLLFLFSSAYSRGVFRDRAHKSEVAHRFKDLGEEENFKALVLI AFSQYLQCCPF  
Tarsier MKWVTFISLLFLFSSAHSRGLFRDRAHKSEIAHRYKDLGETDFKYLVLITFSQYLQKCPF  
Mouse lemur MKWVTFISLLFLFSSAYSRGVFRDTHKSELAHRFNDLGEENFKALVLI VTFSSQFLQKCPF  
Bushbaby MKWVTFISLLFLFSSAYSRGVFRDTHKSELAHRFNDLGEENFKALVLI VTFSSQFLQKCPF  
Chinese hamster MKWVTFISLLFLFSSAYSRGVFRDTHKSEIAHRFKDLGEEENFKGLVLI AFSQYLQCCPF  
Squirrel MKWVTFIFLLFLFSSAYSRGVFRREAGKSEI IKRFREFGEQEFKGLVLI VTFSSQILQKTSY  
Golden hamster MKWVTFLLLLFVSDSAFSGVFRDRAHKSEIAHRFKDLGEGHFKGLVLI AFSQFLQKCPY  
Mouse MKWVTFLLLLFVSGSAFSGVFRREAHKSEIAHRYNDLGEQHFKGLVLI AFSQYLQKCSY  
Rat MKWVTFLLLLFISGSAFSGVFRREAHKSEIAHRFKDLGEGHFKGLVLI AFSQYLQKCPY  
Naked mole rat MKWVTFISLLLLFSSAYSRGVFRREAHKSEIAHRFTDLGEEKHFKGLALITFSQYLQKCSF  
Guinea pig MKWVTFISLLFLFSSVYSRGVFRREAHKSEIAHRFNDLGEHFKGLVLI TLSQHLQKSPF  
Rabbit MKWVTFISLLFLFSSAYSRGVFRREAHKSEIAHRFNDVGEENF IGLVLI TFSQYLQKCPY  
Pika MKWVTFISLLFLVSSAYSRGLIRREAHKSEIAHRFKDVGEENFKGLVLI AFSQYLQKCPF  
Pig MKWVTFISLLFLFSSAYSRGVFRDTHKSEIAHRFKDLGEGYFKGLVLI AFSQHLQKCPY  
Alpaca MKWVTFISLLFLFSSVYSRGVFRDTHKSEIAHRFKDLGEDDFKGLVLI AFSQYLQCCPF  
Bactrian camel MKWVTFISLLFLFSSVYSRGVFRDTHKSEIAHRFKDLGEDDFKGLVLI AFSQYLQCCPF  
Dolphin MKWVTFISLIFL FSSAYSRGVFRDTHKSEIAHRFNDLGEENFKGLVLI AFSQYLQOSP  
Killer whale MKWVTFISLIFL FSSAYSRGVFRDTHKSEIAHRFNDLGEENFKGLVLI AFSQYLQOSP  
Cow MKWVTFISLLLLFSSAYSRGVFRDTHKSEIAHRFKDLGEEHFKGLVLI AFSQYLQCCPF  
Sheep MKWVTFISLLLLFSSAYSRGVFRDTHKSEIAHRFNDLGEENFQGLVLI AFSQYLQCCPF  
Goat MKWVTFISLLLLFSSAYSRGVFRDTHKSEIAHRFNDLGEENFQGLVLI AFSQYLQCCPF  
Horse MQWVTFVSLFLFSSAYSRGVLRDTHKSEIAHRFNDLGEKHFKGLVLI AFSQYLQCCPF  
White rhinoceros MKWVTFISLLFLFSSAYSRGVFRRHSHYKSEIAHRFNDLGEPHFKGLVLI AFSQYLQOQTY  
Cat MKWVTFISLLFLFSSAYSRGVFRREAHQSEIAHRFNDLGEENFRLVLI AFSQYLQCCPF  
Dog MKWVTFISLFLFSSAYSRGLVFRREAYKSEIAHRYNDLGEENFRLVLI AFSQYLQCCPF  
Ferret MKWVTFISLLFLFSSAYSRGVTRREAQOSEIAHRYNDLGEENFRLVLI AFSQYLQCCPF  
Panda MKWVTFISLLFLFSSAYSRGVTRREAQOSEIAHRYNDLGEENFRLVLI AFSQYLQCCPF  
Pacific walrus MKWVTFISLLFLFSSAYSRGVVRRETOQSEIAHRYNDLGEENFRLVLI AFSQYLQOSP  
Weddell seal MKWVTFISLLFLFSSAYSRGVVRREAQOSEVAHRFNDLGEENFRLVLI AFSQYLQCCPF  
Black flying fox MKWVTFISLLFLFSSAYSRGVFRDTHKSEIAHRYNDLGEENFRELVLITFSQYLQCCPF  
Megabat MKWVTFISLLFLFSSAYSRGVFRDTHKSEIAHRYNDLGEEQFRELVLITFSQYLQCCPF  
Hedgehog MKWVTFISLLFLISSAYSRGVIRDRAHKSEIAHRFSDLGEGNFKALVLI TFSQFLQKCPY  
Shrew MKWVTFISLLFLFNSAYSRGVFRDRAHKSEIAHRFKDLGEEENFKGLVLI AFSQYLQKCPF  
Star nosed mole MKWVTFISLLFLFSSAYSRGVFRDRAHKSEIAHRFNDLGEENFRLVLI AFSQYLQKCPF  
Hyrax MKWITFIALLFLFSSASSRGLFRDRAHKSEIAHRYNDLGENIFKGL-LISLAQHL-----  
Elephant MKWVIFISLSFLFSSAYSRGVFRREAYKSEIAHRYKDLGEDLFKGLLLISFAQYLQKSPY  
Manatee MKWVTFISLLFLFSSAYSKGVFRDTHKSEIAHRYNDLGEDLFTGLLLISFSQYLQKSPF  
Cape golden mole MKWVTFISLLFLFSSAYSRGVFRDRAHKSELAHRYTDLGEDVFKGLLLIAFSQYLQKCPY  
Tenrec MKWVTFISLLFLFSSASSRGLFRDRAHKSEIAHRYKDLGEEFKGLLLITFSQYLQKCPY  
Armadillo MKWVIFISLLFLFSSAYSKGVFRDRAHKSEIAHRFNDLGEENFRLTLVMFAQYLQKCPF  
Sloth MKWVTFISL-FLFSSAYSRGVVRREADKSEIAHRFKDLGEEENFRG-----  
Opossum MKWVTFISLIFL FSSVYSRDLFRDAPKSEIAKRYRDLGEENFKALVLI TFAQYLQKCPF  
Tasmanian devil MKWVTFISLIFL FSSVHSREIFRRDAPTSEIAKRYRDLGEENFKGLVLI TFAQYLQKCPF  
Platypus M-----

Human EDHVKLVNEVTEFAKTCVADESAENCDKSLHTLFGDKLCTVATLREY GEMADCCAQEP  
Chimpanzee EDHVKLVNEVTEFAKTCVADESAENCDKSLHTLFGDKLCTVATLREY GEMADCCAQEP  
Bonobo EDHVKLVNEVTEFAKTCVADESAENCDKSLHTLFGDKLCTVATLREY GEMADCCAQEP  
Gorilla EDHVKLVNEVTEFAKTCVADESAENCDKSLHTLFGDKLCTVATLREY GEMADCCAQEP  
Orangutan EDHVKLVNEVTEFAKTCVADESAENCDKSLHTLFGDKLCTVATLREY GEMADCCAQEP

Gibbon EDHVKLVNEVTEFAKTCVADESAENCDKSLHTLFGDKLCTVATLRETYGEMADCCAKQEP  
Rhesus EEHVKLVNEVTEFAKTCVADESAENCDKSLHTLFGDKLCTVATLRETYGEMADCCAKQEP  
Crab-eating macaque EEHVKLVNEVTEFAKTCVADESAENCDKSLHTLFGDKLCTVATLRETYGEMADCCAKQEP  
Olive baboon -----VATLRETYGEMADCCAKQEP  
Marmoset EEHLKLVNEVTEFAKTCVADETAENCDKSLHTLFGDKLCTVATLRETYGDMADCCAKQEP  
Squirrel monkey DDHVKLVNEVTEFAKTCVADESAENCDKSLHTLFGDKLCTVATLRETYGDMADCCAKQEP  
Tarsier QEHVKLMNEVIEFAKTCVADESAENCDKSLHTLFGDKLCTVASLRETYGEMADCCAKQEP  
Mouse lemur EDHVKLVNEITDFAKTCVADESAENCDKSLHTLFGDKLCTVASLRETYGEMADCCAKQEP  
Bushbaby EDHVKLVNEVTEFAKTCVADESAENCDKSLHTLFGDKLCTVASLRETYGEMADCCAKQEP  
Chinese hamster EEHVKLVGEVTEFAKTCVADETAENCDKSLHTLFGDKLCTIATLRETYGDMADCCAKQEP  
Squirrel DDLAKFTTEVTDLAKACVADEFVDCNKPLDTIFGEEACKIATLRDITYGDMADCCANQDL  
Golden hamster EEHVKLVNEVTDFAKTCVADESAENCDKSLHTLFGDKLCAIPTLRDSYGELADCCAKKEP  
Mouse DEHAKLVQEVTDFAKTCVADESAENCDKSLHTLFGDKLCAIPNLRNRYGELADCCTKQEP  
Rat EEHIKLVQEVTDFAKTCVADESAENCDKSIHTLFGDKLCAIPKLRNRYGELADCCAKQEP  
Naked mole rat EEHIKLVKEVTDFAKTCVADESAENCDKSIHTLFGDKLCAIQTLRETYGALADCCAKQEP  
Guinea pig EEHVKLVNEVTDFAKACVADESAQNCGKAIATLFGDKVCAIPSLRETYGELADCCAKEDP  
Rabbit EEHAKLVKEVTDLAKACVADESAENCDKSLHDFGDKICALPSLRDITYGDVADCCCKEKEP  
Pika EEHVKLVNEVTEFAKTCVADESAENCGKSLHDFGDKICAIPTLRDSYGDLAG-CAKQEP  
Pig EEHVKLVREVTEFAKTCVADESAENCDKSIHTLFGDKLCAIPSLRETYGDLADCCCKEKEP  
Alpaca DDHVKLVNEVTEFAKTCVADESAADCDKSLHILFNGNKLCTVASLRETYGEMADCCCKQEA  
Bactrian camel DDHVKLVNEVTEFAKTCVADESAADCDKSLHTLFGDKLCTVASLRETYGEMADCCCKQEP  
Dolphin DEHVKLVNEITDFAKTCVADESAENCDKSLHTLFGDKLCAVASLRETYGEMADCCGKQDP  
Killer whale DEHVKLVNEITDFAKTCVADESAENCDKSLHTLFGDKLCAVASLRETYGEMADCCGKQEP  
Cow DEHVKLVNELTEFAKTCVADESHAGCEKSLHTLFGDELCKVASLRETYGDMADCCCKQEP  
Sheep DEHVKLVKELTEFAKTCVADESHAGCDKSLHTLFGDELCKVATLRETYGDMADCCCKQEP  
Goat DEHVKLVKELTEFAKTCVADESHAGCDKSLHTLFGDELCKVATLRETYGDMADCCCKQEP  
Horse EDHVKLVNEVTEFAKCAADESAENCDKSLHTLFGDKLCTVATLRAITYGELADCCCKQEP  
White rhinoceros EDHVKLVNEVNEFAKCAADESAENCDKSLHTLFGDELCKVATNRETYGELADCCCKEKEP  
Cat EDHVKLVNEVTEFAKGCVADESAANCEKSLHELFGDKLCTVASLRDITYGEMADCCCKEKEP  
Dog EDHVKLAKEVTEFAKACAAESGANCDKSLHTLFGDKLCTVASLRDITYGDMADCCCKQEP  
Ferret EDHVKLVKEMTEFAKCAADQSGADCGKSLHTLFGDKLCTVASLRETYGELADCCCKQEP  
Panda EDHAKLAKEVTEFARGCAADQSGADCGKSLHTLFGDKLCTVASLRETYGELADCCCKQEP  
Pacific walrus EDHVKLAKEVTEFAKCAADQSGADCGKSLHTLFGDRLCTVASLRETYGDLADCCCKQDP  
Weddell seal EDHVKLAKEVTEFAKCAADQSGADCGKSLHTLFGDKLCTVASLRETYGELADCCCKQDP  
Black flying fox DEHSKLTNEVTEFAKTCVADESAENCDKSLHTLFGDKLCTVASLRETYGELADCCCKQDP  
Megabat DEHSKLTNEVTEFAKTCVADESAENCDKSLHTLFGDKLCTVASLRETYGELADCCCKQDP  
Hedgehog EEHVKLVKEVTDFAKGCVADESAENCEKSIHTLFGDKLCKMPSLRETYGEMADCCAKQDP  
Shrew EDHVKLVQEVNEFAKCAADESGPNCDSLPTLFGDKLCTVASLRETYGELADCCCKQEP  
Star nosed mole EDQLKLVTDVTEFAKTCVADESAENCDKPLQTLFGDKLCTVASVRETYGELADCCCKEKEP  
Hyrax -----AEFAKTCVADESAADCDHSIHAIFGDKVCAVKAHPDLYADLTECCCKQEP  
Elephant DEHVQSVTAVTDLAKTCAADESAEHCGDSLHTIFGDKLCAVTAHQDITYGEFAECCGKQEP  
Manatee EDQEQSVKEVTEFAKTCVADESAENCDHSLHAIFEDKLCVRAHSDVYAEFVECCCKEKEP  
Cape golden mole EEHVKLVNEVTEFAKTCVADESAENCDKSLHTLFGDKLCTIASLRDITYGELADCCCKQEP  
Tenrec EEHVKLVTEVTDFAKTCVADESAENCGKSLHTLFGDKLCTIASLRDITYGELADCCCKQEP  
Armadillo EEHVKLVNEVTEFAKTCVADESAENCGKSLHTLFGDELCSIANLRDSYGELADCCDKQEP  
Sloth -----HTLLGDKACSVGSLRETYGELADCCGKQEP  
Opossum EDHVKLVDEVVQFAKCAADETAENCGKSLHQLLGDKLCIASLRETYGEMADCCAKEEP  
Tasmanian devil EDHVKLVSEVVEFAKCAADESAENCGKSLHELLGDKLCKVPSLRETYGEMADCCAKEEP  
Platypus -----SLVFAEELCKADHLKDSYAEALAEACCTA

Human ERNECFLOHKDDNPPLPRLVLRPEVDVMCTAFHDNEETFLKKYLYEIARRHPYFYAPELLF  
Chimpanzee ERNECFLOHKDDNPPLPRLVLRPEVDVMCTAFHDNEETFLKKYLYEVARRHPYFYAPELLF  
Bonobo ERNECFLOHKDDNPPLPRLVLRPEVDVMCTAFHDNEETFLKKYLYEVARRHPYFYAPELLF  
Gorilla ERNECFLOHKDDNPPLPRLVLRPEVDVMCTAFHDNEETFLKKYLYEIARRHPYFYAPELLF  
Orangutan ERNECFLOHKDDNPPLPRLVLRPEVDVMCTAFHDNEETFLKKYLYEIARRHPYFYAPELLF  
Gibbon ERNECFLOHKDDNPPLPRLVLRPEVDVMCTAFHDNEETFLKKYLYEIARRHPYFYAPELLF  
Rhesus ERNECFLOHKDDNPPLPRLVLRPEVDVMCTAFHDNEETFLKKYLYEVARRHPYFYAPELLF  
Crab-eating macaque ERNECFLOHKDDNPPLPRLVLRPEVDVMCTAFHDNEETFLKKYLYEVARRHPYFYAPELLF  
Olive baboon ERNECFLOHKDDNPPLPRLV-----  
Marmoset ERNECFLOHKDDKPDLPPLVLRPEVDVMCTAFQEHEDTFLKKYLYEVARRHPYFYAPELLF  
Squirrel monkey ERNECFLOHKDDKPDLPPLVLRPEVDVMCSAFQADETFLKKYLYEVARRHPYFYAPELLF  
Tarsier ERNECFLEHKDDNPPLPSLIRPEADVMTAFQENADMFLGNLYEVARRHPYFYAPPELLY  
Mouse lemur ERNQCFLAHKDDKPDLPPLERPETDVMCTSFQENENRFLG-----  
Bushbaby ERNQCFLDHKDDKPDLPPLVLRPEVDVMCTSFQDNEETFLGHYLYEVARRHPYFYGPELLF  
Chinese hamster ERNECFLOHKDDKPSLPALVLRPEADVMTSFQESENMFLGKLYEVARRHPYFYAPPELLY

|                  |                                                                |
|------------------|----------------------------------------------------------------|
| Squirrel         | ERFQCLIKYKEDTPTIPPLHPIDPDALCISFDESSONVLGHFVYEVARRNPYLCGQKVMY   |
| Golden hamster   | ERNECFLLKHKDDHPNLPPFVRPDAEAMCTSFQENAVTFMGHYLHEVARRHPYFYAPELly  |
| Mouse            | ERNECFLOHKDDNPDLPPFERPEAEAMCTSFKENPTTFMGHYLHEVARRHPYFYAPELly   |
| Rat              | ERNECFLOHKDDNPDLPPFQRPEAEAMCTSFQENPTSFGLGHYLHEVARRHPYFYAPELly  |
| Naked mole rat   | ERNECFLEHKEDNPALPPFKRPEPEAMCTSFNEDNQLFMGHYLYEVARRHPYFYAPELly   |
| Guinea pig       | DRVECFLOHKDDNPDLPPFERPEPEALCTAFKENNDRFIGQFIFEVSRRHYPYFYAPELly  |
| Rabbit           | ERNECFLLHKDDKPDLPFFARPEADVLCFAFHDDKKAFFGHYLYEVARRHPYFYAPELly   |
| Pika             | ERNQCFLLKHKDDNPDLPPFVRPDEVLCTAFHDNEKKAFFGHYLYEVARRHPYFYAPELly  |
| Pig              | ERNECFLOHKNDNPDIKPKL-KPDPVALCADFQEDKQKFWGKYLIEIARRHPYFYAPELly  |
| Alpaca           | ERNECFLOHKNDNPDLKPKL-KPEPEALCTAFQENKRFGGKYLIEIARRHPYFYAPELly   |
| Bactrian camel   | ERNECFLOHKSDNPDLKPKL-KPEPEALCTAFQENKRFGGKYLIEIARRHPYFYAPELly   |
| Dolphin          | ERNECLLKHKDDNPDLKPKL-KPDPETFCTEFKENEKQFWGKYLIEIARRHPYFYAPELly  |
| Killer whale     | ERNECLLKHKDDNPDLKPKL-KPDPETLCTEFKENEKQFWGKYLIEIARRHPYFYAPELly  |
| Cow              | ERNECFLLSHKDDSPDLKPKL-KPDPNTLCDEFKADEKQFWGKYLIEIARRHPYFYAPELly |
| Sheep            | ERNECFLLNHKDDSPDLKPKL-KPEPDTLCAEFKADEKQFWGKYLIEVARRHPYFYAPELly |
| Goat             | ERNECFLLKHKDDSPDLKPKL-KPEPDTLCAEFKADEKQFWGKYLIEVARRHPYFYAPELly |
| Horse            | ERNECFLLTHKDDHPNLKPKL-KPEPDAQCAAFQEDPKFLGKYLIEVARRHPYFYGPELLF  |
| White rhinoceros | ERNECFLOHKDDSPNFPPL-KAEADVLCAQFQADEQSFLGKYLIEIARRHPYFYAPELly   |
| Cat              | ERNECFLOHKDDNPFGFQLVTPPEADAMCTAFHENEQRFLGKYLIEIARRHPYFYAPELly  |
| Dog              | DRNECFLLAHKDDNPFGFPLVAPEPDALCAAFQDNEQLFLGKYLIEIARRHPYFYAPELly  |
| Ferret           | ERNECFLLTHKDDNPFGFPLVTPPEVMCTAFQENEQQFLGKYLIEVARRHPYFYAPELly   |
| Panda            | ERNECFLLKHKDDNPFGFPLVTPPEPDALCAAFQENEQRFLGKYLIEVARRHPYFYGPELLY |
| Pacific walrus   | ERNECFLLSHKDDNPFGFPLVTPPEPDAICTAFQENEQKFLGKYLIEVARRHPYFYAPELly |
| Weddell seal     | ERNECFLLTHKDDNPFGFPLVTPPEPDAMCAAFQESEQKFLGKYLIEVARRHPYFYAPELly |
| Black flying fox | ERNECFLLKHKDDNPDLPPVVKPEPEALCTAFQENNKFLENYLYEVARRHPYFYGPELLY   |
| Megabat          | ERNECFLLKHKDDNPDLPPIVKPEPEALCTAFQENNKFLENYLYEVARRHPYFYGPELLY   |
| Hedgehog         | ERIDCFVQHKDDSPNLPPVVRPDEVMCTAFQEDQLKFAGSYLYEVARRHPYFYAPELly    |
| Shrew            | ERADCFASHRDDNPFGFPLMVRPPVDELCSYQADAMFAGKYLIEVARRYPYFYAPELly    |
| Star nosed mole  | GRHECFLOHKDDNPGLPRFTRPADALCSAFQENEKFAAHYLYEVARRHPYFYAPELly     |
| Hyrax            | ERNECFQKHKDDNPDLPLVLRPTADALCASFHENEKNLLGHYLYEVARRHPYFYAPELly   |
| Elephant         | ERNECFLLKHKDDNPALPPLVLRPPADALCASFEENERKFFGVYLYEVARRHPYFYAPELly |
| Manatee          | ERHNCFLQHKDDNPVPPFVVRGADDLCTAFHENEKRFFGKYIYEVARRHPYFYAPELly    |
| Cape golden mole | ERNCFLLTHKDDNPGLPQLVRRPADLCAAFQADEKQFFGEYLYQVARRHPYFYAPELly    |
| Tenrec           | ERNECFLLKHRDESPALPPIERP SADVLCTAFEDNEERFFGKYIYEVARRHPYFYGPELLY |
| Armadillo        | ERNECFLLKHKDDNPDLPLVLRPDAEVMCTAYQENEQDFVEIYVHGVARRHPYFYGPELLY  |
| Sloth            | ERNQCFLLKHKDDNPDLPPFARPEVAVICASFQENEKFLGHYLYEISRRNPFFYAPELIH   |
| Opossum          | ERNQCFLLSHKDDHPDLKPKIVAPEPKLCOEFQENENKVMGYLHQVARRHPYFYAPALLA   |
| Tasmanian devil  | ERHRCFLSHKDDQPNLKPKEAPEPETLCKNFQENENRVLGFYLYEVARRHPYFYAPALLA   |
| Platypus         | EKAECLLKHKDETPVEPPFTRPEPAVLCKEYEDNRNQFLG-----                  |

|                     |                                                                |
|---------------------|----------------------------------------------------------------|
| Human               | FAKRYKAAFTECCQAADKAACLPLKLDLDRDEGKASSAKQRLKCASLQKFGERAFKAWAV   |
| Chimpanzee          | FAERYKAAFTECCQAADKAACLPLKLDLDRDEGKASSAKQRLKCASLQKFGERAFKAWAV   |
| Bonobo              | FAERYKAAFTECCQAADKAACLPLKLDLDRDEGKASSAKQRLKCASLQKFGERAFKAWAV   |
| Gorilla             | FAARYKAAFTECCQAADKAACLPLKLDLDRDEGKASSAKQRLKCASLQKFGERAFKAWAV   |
| Orangutan           | FAVRYKAAFTECCQAADKAACLPLKLDLDRDEGKASSAKQRLKCASLQKFGERAFKAWAV   |
| Gibbon              | FAERYKAAFTECCQAADKAACLPLKLDLDRDEGKASSAKQRLKCASLQKFGERAFKAWAV   |
| Rhesus              | FAARYKAAFAECCQAADKAACLPLKLDLDRDEGKASSAKQRLKCASLQKFGDRAFKAWAV   |
| Crab-eating macaque | FAARYKAAFAECCQAADKAACLPLKLDLDRDQGKASSAKQRLKCASLQKFGDRAFKAWAV   |
| Olive baboon        | -----LDELDRDQGKASSAKQRLKCASLQKFGDRAFKAWAV                      |
| Marmoset            | FAQKYKAAFTECCQAADKGAACLPLKLDLDRDQGKASSAKQRLKCASLQKFGERAFKAWSV  |
| Squirrel monkey     | FAQKYKAAFTECCQAADKDAACLTPKLDLDRDQGKASSAKQRLKCASLQKFGERAFKAWVV  |
| Tarsier             | YQQKYKAVFTECCQAADKAACLFPK-----AV                               |
| Mouse lemur         | -----LDELKEEGMASSARQRLKCSSLEKFGERAFKAWAV                       |
| Bushbaby            | FAEKYKAAFTECCQAADKAACLPLKLDLKEEGMASSAKQRLKCSSLEKFGDRAFKAWAV    |
| Chinese hamster     | YAQKYKTALKECCAADKAACLTPKLDLALKEKALFSSAKQRLKCTSIOKFGDRAFKAWAV   |
| Squirrel            | FAEKYKGFLECCKAADKGECLTQKTENLKKTIMLSSAKDRFKCSVLEKYEERGLKAWLI    |
| Golden hamster      | YAEKYSAIMTECCGEADKAACITPKLDLALKEKALSSVNQRLKCSSLQRFQORAFKAWAV   |
| Mouse               | YAEQYNEILTQCCAEADKESCLTPKLDGVKEKALVSSVRQRMKCSSMQKFGERAFKAWAV   |
| Rat                 | YAEKYNEVLTQCCTESDKAACLTPKLDVAVKEKALVAAVRQRMKCSSMQRFGERAFKAWAV  |
| Naked mole rat      | YAERYMDVLTTECCQAADKAACLTPKLDLALKEKALTSAAQORLKCASIQKFGERAFKAWAL |
| Guinea pig          | YAEKYKNALTECCQAADKAACLTPKLDLAIKEKALVSSAQORLKCASLQKFGERAFKAWSV  |
| Rabbit              | YAQKYKAILTECCQAADKGAACLTPKLDLALKEKALTSAAQERLRCASIQKFGDRAFKAWAL |
| Pika                | YAEKYKAILTECCQAADKGAACLTPKLDLALKEKALTDAFNERLKCASIQKFGDRAFKAWAL |
| Pig                 | YAIYKDVFECCQAADKAACLPLKIEHLREKVLTSAAQORLKCASIQKFGERAFKAWSL     |
| Alpaca              | YAHQYKHVFECCKEADKAACLPLKIDLEKGM---TSARQRLRCTSIO-FGEEALKAWSV    |

|                  |                                                                |
|------------------|----------------------------------------------------------------|
| Bactrian camel   | YAHQYKHVFEECCDADKAACLLPKLDALKERILASSARQLRCTS IQKFGDRALKAWSV    |
| Dolphin          | FAHQYKGVFGECCQAADKGA CLIPKI--L-EE--ASSARQLKCTS IQKFGERALKAWSV  |
| Killer whale     | FAHQYKGVFAECCQAADKGA CLIPKIETVREEVLAASSARQLKCTS IQKFGERALKAWSV |
| Cow              | YANKYNGVFOECCQAEDKGA CLLPKIETMREKVLASSARQLRCASIQKFGERALKAWSV   |
| Sheep            | YANKYNGVFOECCQAEDKGA CLLPKIETMREKVLASSARQLRCASIQKFGERALKAWSV   |
| Goat             | YANKYNGVFOECCQAEDKGA CLLPKIETMREKVLASSARQLRCASIQKFGERALKAWSV   |
| Horse            | HAEYKADFTTECCPADDKAGCLIPKLDALKERILSSAKERLKCSSFQNFGERAVKAWSV    |
| White rhinoceros | YAEYRDDLKECCQAADKAACLLPKI AVLDRDRLVSSAKERLKCASIQKFGERALKAWTV   |
| Cat              | YAEYKGVFTECCQAADKAACLLPKIDALREKVLSSAKERLKCASIQKFGERAFKAWSV     |
| Dog              | YAQQYKGVFAECCQAADKAACLLPKIEALREKVLSSAKERFKCASIQKFGDRAFKAWSV    |
| Ferret           | YTQQYKGVFTECCQAADKAACLLPKTEALREKVLSSARERFKCASIQKFGDRAFKAWSV    |
| Panda            | YAQQYKGVFAECCQAADKAACLLPKIDDLREKVLSSAKERFKCASIQKFGDRAFKAWSI    |
| Pacific walrus   | YAQQYKQVFAECCQAADKAACLLPKIDALREKVLSSAKERFKCASIQKFGDRAFKAWSV    |
| Weddell seal     | YAQQYKQVFAECCQAADKAACLLPKIDALREKVLSSAKERFKCASIQKFGDRAFKAWSI    |
| Black flying fox | YVKQYKAILTECCQAADKATCLAPKAVLKEKLLSSAKQRHKCASIQKFGERAFKAWSI     |
| Megabat          | YVKYKAILTECCQAADKATCLAPKAVLKEKLLSSAKQRHRCAS-----SM             |
| Hedgehog         | FAAKYKDVLAECCQAADKGA CLTPKMDELK GKALVSAAQORFKCAGLQKFGERAFKAYAV |
| Shrew            | YAQKYKDALAECCSAADKAACLLPKIDDLKESVMTSGAKQRFK CAGIEKFGERAFKAWAV  |
| Star nosed mole  | YAKKYRQILAECQAADKGA CLTPKIDELKEVVLSSAKQRFK CASIQKFGERAFKAWSV   |
| Hyrax            | YSHEYKDVLECCQAADKACLTPK-----                                   |
| Elephant         | YSEKYKDILTECCHADDKAACLLPKIDALKDTVLSSAARQLKCANIHKFGERAFKAWAV    |
| Manatee          | YSYKYREILAECCEAADKAACLLPKINSLKEKVLSSAKERLRCVSI EKFGERAFKAWGV   |
| Cape golden mole | FSQKYKAVLTECCQAADKADCLTPKLDLKEAVLSSAKQRLKCANIEKFGERAFKAWAV     |
| Tenrec           | ISAKYKAALTECCHVADKAACLLPKIDELKEHALSSAKQRLRCASIEKFGPRAFNAWAV    |
| Armadillo        | YAQQYKVAFKECCQAADKAACLLPKMDALKQSALSSAKQRFK CAGIEKFGERAFKAWGV   |
| Sloth            | YTHRYKDALKECCSAEDKAACLLAPKLEKLKEKVLSSAKQRLKCSNLEKFGERPFAWAV    |
| Opossum          | YAIQYRDVRECCAAADKATCLNDKLTDLREKVLSSAGAKQRFRCASLDKFGERAVKAGLV   |
| Tasmanian devil  | YAHQYKEAVGCCQEADKGA CDFNKL SVLRDKVISSAGAKQRFRCSSLDEFGERAVKAGLV |
| Platypus         | -----LSLQLPELKD KVLVTTAKQRFRC AAYQKFGERAMKAVLV                 |

|                     |                                                                    |
|---------------------|--------------------------------------------------------------------|
| Human               | ARLSQRFPKAEFAEVSKLVTDLTKVHTECCHGDLL ECADDRADLAKY ICENQDS ISSKLLK   |
| Chimpanzee          | ARLSQRFPKAEFAEVSKLVTDLTKVHTECCHGDLL ECADDRADLAKY ICENQDS ISSKLLK   |
| Bonobo              | ARLSQRFPKAEFAEVSKLVTDLTKVHTECCHGDLL ECADDRADLAKY ICENQDS ISSKLLK   |
| Gorilla             | ARLSQRFPKAEFAEVSKLVTDLTKVHTECCHGDLL ECADDRADLAKY ICENQDS ISSKLLK   |
| Orangutan           | ARLSQRFPKAEFAEVSKLVTDLTKVHTECCHGDLL ECADDRADLAKY ICENQDS ISSKLLK   |
| Gibbon              | ARLSQRFPKAEFAEVSKLVTDLTKVHTECCHGDLL ECADDRADLAKY ICENQDS ISSKLLK   |
| Rhesus              | ARLSQKFPKAEFAEVSKLVTDLTKVHTECCHGDLL ECADDRADLAKY ICENQDS ISSKLLK   |
| Crab-eating macaque | ARLSQKFPKAEFAEVSKLVTDLTKVHTECCHGDLL ECADDRADLAKY ICENQDS ISSKLLK   |
| Olive baboon        | ARLSQKFPKAEFAEVSKLVTDLTKVHTECCHGDLL ECADDRADLAKY ICENQDS ISSKLLK   |
| Marmoset            | ARVSQRFPKADFTEVTKVTDLTKVHTECCHGDLL ECADDRADLAKY ICENQDS ISSKLLK    |
| Squirrel monkey     | ARLSQKFPKADFTEVTKVTDLTKVHTECCHGDLL ECADDRADLAKY ICENQDS ISSKLLK    |
| Tarsier             | ARMSQKFPKADFTEVTKVTDLTKVHTECCHGDLL ECADDRADLAKY ICENQDS ISSKLLK    |
| Mouse lemur         | ARLSQRFPKADFTEVTKVTDLTKVHTECCHGDLL ECADDRADLAKY ICENQDS ISSKLLK    |
| Bushbaby            | ARLSQRFPKAEFAEVSKLVTDLTKVHTECCHGDLL ECADDRADLAKY ICENQDS ISSKLLK   |
| Chinese hamster     | ALLSQKYPKADFTEITKIATDLTKI IKESCSGDLL ESTHDRVTLANY ICENQDK ISSKLVG  |
| Squirrel            | SRLSRKFPQAEFTEITKIATDLTKI IKESCSGDLL ESTHDRVTLANY ICENQDK ISSKLVG  |
| Golden hamster      | ARMSQKFPKADFTEITKLATDLTKL TECCCHGDLL ECADDRADLAKY ICENQDS ISSKLLK  |
| Mouse               | ARLSQTFPNADFTEITKLATDLTKVNKECCHGDLL ECADDRADLAKY ICENQDS ISSKLLK   |
| Rat                 | ARMSQRFPNADFTEITKLATDLTKINKECCHGDLL ECADDRADLAKY ICENQDS ISSKLLK   |
| Naked mole rat      | ARMSQKFCFAEFIEISRIVNDLTKVNKECCRGDLL ECADDRADLAKY ICENQDS ISSKLLK   |
| Guinea pig          | ARLSQKFPKAEFAEISTIVTDLTKVHTECCHGDLL ECADDRADLAKY ICENQDS ISSKLLK   |
| Rabbit              | VRLSQRFPKADFTEISKIVTDLTKVHTECCHGDLL ECADDRADLAKY ICENQDS ISSKLLK   |
| Pika                | SRLSQEFPKADFMEISKLVTDLTKVHTECCHGDLL ECADDRADLAKY ICENQDS ISSKLLK   |
| Pig                 | ARLSQRFPKADFTEISKIVTDLTKVHTECCHGDLL ECADDRADLAKY ICENQDS ISSKLLK   |
| Alpaca              | GHL SQKFPKADFTEISKIVTDLTKIHK ECCHGDLL ECADDRADLAKY ICENQDS ISSKLLK |
| Bactrian camel      | GHL SQKFPKADFTEISKIVTDLTKIHK ECCHGDLL ECADDRADLAKY ICENQDS ISSKLLK |
| Dolphin             | ARLSQKFPKADFTEISKIVTDLTKVHTECCHGDLL ECADDRADLAKY ICENQDS ISSKLLK   |
| Killer whale        | ARLSQKFPKADFTEISKIVTDLTKVHTECCHGDLL ECADDRADLAKY ICENQDS ISSKLLK   |
| Cow                 | ARLSQKFPKAEFVEVTKLVTDLTKVHTECCHGDLL ECADDRADLAKY ICENQDS ISSKLLK   |
| Sheep               | ARLSQKFPKADFTEVTKIVTDLTKVHTECCHGDLL ECADDRADLAKY ICENQDS ISSKLLK   |
| Goat                | ARLSQKFPKADFTEVTKIVTDLTKVHTECCHGDLL ECADDRADLAKY ICENQDS ISSKLLK   |
| Horse               | ARLSQKFPKADFTEVTKIVTDLTKVHTECCHGDLL ECADDRADLAKY ICENQDS ISSKLLK   |
| White rhinoceros    | ARLSQKFPKADFTEISKLVTDLTKIHK ECCHGDLL ECADDRADLAKY ICENQDS ISSKLLK  |
| Cat                 | ARLSQKFPKAEFAEISKLVTDLTKIHK ECCHGDLL ECADDRADLAKY ICENQDS ISSKLLK  |
| Dog                 | ARLSQRFPKADFTEISKVTDLTKVHTECCHGDLL ECADDRADLAKY ICENQDS ISSKLLK    |



|                  |                                                               |
|------------------|---------------------------------------------------------------|
| Ferret           | ARLSQKFPKADFAEVSKLVTDLTKVHKECCHGDLLCADDRADMAKYICENQDSISTKLLK  |
| Panda            | ARLSQKFPKADFAEVSKVVTDLTKVHKECCHGDLLCADDRADLAKYMCENQDSISSKLLK  |
| Pacific walrus   | ARMSQKFPKADFAEVTKLVTDLTKIHKECCHGDLLCADDRADLAKYMCENQDSISTKMK   |
| Weddell seal     | ALMSQKFPKADFAEVSKLVTDLTKIHKECCHGDLLCADDRADLAKYMCENQDSISSKMK   |
| Black flying fox | ARLSQKFPKADFDLSKLVTDLTKIHKECCHGDLLCADDRADLAKYVCDNQDSFSSKLLK   |
| Megabat          | ARVSQKFPKADFMELSKIIVSDLSKIHKECCHGDLLCADDRGDLVKYMCNQDSFSSKLLK  |
| Hedgehog         | ARMSQKFPKADFMEISKIVTDLTKIHKECCHGDLLCADDRADLVKYTCENQDTISSKLLK  |
| Shrew            | ARLSQKFPNADFAEISKIVTDLTKINKECCHGDLLCADDRVELGKYMCDNKDISISSKLG  |
| Star nosed mole  | SRLSQKFPKADFAEISKIVGDLTKVNKECCEGDLLCADDRREALAKYICENQDTISSKLLK |
| Hyrax            | -----AELAKHICDHQGELSSKLLK                                     |
| Elephant         | THLSQKFPKADFAEVSKLATDLGKVYQECCHGDLLCADDRADLAKYICDNQETLSSKLLK  |
| Manatee          | SRLSQKFPKAEFTEISKIVADLAKIHQECCHGDLLCADDRADLAKYICDNQDSLSSKLLK  |
| Cape golden mole | SQMSQKFPKAEFSDITKVVLDLAKIHQECCHGDLLCADDRADLAKYMCENQDLFSSKLLK  |
| Tenrec           | ARLSQKFPKADFPQISQVTLGAKIHTECCHGDLLCADDRADLAKYTCENQDTISSKLLK   |
| Armadillo        | SSTSQKFPKTDFAEVTKIIVTDLTKIHKECCNGDLLCADDRADLAKYICDNQDSISSKLLK |
| Sloth            | ATITQSFSHADFAEITKLVTDYTKINQECQGDLLKADDRADLVKYICENQGSISNKLLK   |
| Opossum          | ARLSQKFPKADFAEIHKIVEDLANVHKECCHGDLLCADDRADLSDYVCQNKDISISSKLT  |
| Tasmanian devil  | ARLSQKFPKADFAEIHKIVEDLAKIHTECCHGDLLCADDRADLSEYLCNNKETISTKLG   |
| Platypus         | AKTSQKFPKADFGDIHKVVEDLAKVVKECCHGDQLECMEDRADLTKYLCDNQDTFSSKLLK |

|                     |                                                                |
|---------------------|----------------------------------------------------------------|
| Human               | ECCEKPLLEKSHCIAEVENDEMPADLPSLAADFVESKDVCKNYAEAKDVFLGMFLYEYAR   |
| Chimpanzee          | ECCEKPLLEKSHCIAEVENDEMPADLPSLAADFVESKEVCKNYAEAKDVFLGMFLYEYAR   |
| Bonobo              | ECCEKPLLEKSHCIAEVENDEMPADLPSLAADFVESKEVCKNYAEAKDVFLGMFLYEYAR   |
| Gorilla             | ECCEKPLLEKSHCIAEVENDEMPADLPSLAADFVESKDVCKNYAEAKDVFLGMFLYEYAR   |
| Orangutan           | ECCEKPLLEKSHCIAEVENDEMPADLPSLAADFVESKDVCKNYAEAKDVFLGMFLYEYAR   |
| Gibbon              | ECCEKPLLEKSHCIAEVENDEMPADLPSLAADFVESKDVCKNYAEAKDVFLGMFLYEYAR   |
| Rhesus              | ECCDKPLLEKSHCIAEVENDEMPADLPSLAADYVESKDVCKNYAEAKDVFLGMFLYEYAR   |
| Crab-eating macaque | ECCDKPLLEKSHCIAEVENDEMPADLPSLAADYVESKDVCKNYAEAKDVFLGMFLYEYAR   |
| Olive baboon        | ECCDKPLLEKSHCIAEVENDEMPADLPSLAADYVESKEVCKNYAEAKDVFLGMFLYEYAR   |
| Marmoset            | ECCEKPLLEKSHCIAHVENDEMPADLHALTDDYVESKDVCKNYAEAKDVFMGMFLYEYSR   |
| Squirrel monkey     | ECCDKPLLEKSHCLSHAENDDMPADLPAALAEFVESKDVCKNYAEAKDVFLGMFLYEYSR   |
| Tarsier             | ECCDKPLLEKSHCLSEVENDDMPANLPALTTDFVEDKEVCKNYAEAKDVFLG-----      |
| Mouse lemur         | ECCEKPVLEKSHCLAHVENDDIPADLPSIAADFVEDKEVCKNYAEAKDVFLGTFFLNEYSR  |
| Bushbaby            | ECCEKPLLEKSHCLAHVENDDLPTDLAPLAADFVEDKDVCKNYAEAKDVFLGTFFLYEYSR  |
| Chinese hamster     | ECCDKPLLEKAHCIAETEHDPPADLAALAEADFVEDKDVCKNYAEAKDVFLGTFFLYEYAR  |
| Squirrel            | ECCVKPLLERYHCIIIDLEEDDKLADLPALTADYAEKDVCKNYAEAKDIFLGMFLYEYSR   |
| Golden hamster      | ACCDKPVLLKKAHCLSEVEHDTMPADLPAIAADFVEDQEVCKNYAEAKDVFLGTFFLYEYSR |
| Mouse               | TCCDKPVLKQKSHCLSEVEHDTMPADLPAIAADFVEDQEVCKNYAEAKDVFLGTFFLYEYSR |
| Rat                 | ACCDKPVLQKSHCLAEIEHDNIPADLPSIAADFVEDKEVCKNYAEAKDVFLGTFFLYEYSR  |
| Naked mole rat      | ECCEKPLLEKAHCIMEAERDELPGDLPPELTTDFIEDRVCTHYTGAKDVFLGTFFLFEYSR  |
| Guinea pig          | ECCVKPTLQKAHCILEIQDELPTLAVDFVEDKEVCKNYAEAKDVFLGTFFLFEYSR       |
| Rabbit              | ECCDKPILKHAHCIVGLHNDELPTAGLPAVAEEFVEDKDVCKNYEEAKDVLGKFLYEYSR   |
| Pika                | ECCDKPVLKSHCIAENVHDDTPADLPTLASLDFVEDKDVCKNYQETKDFLGSFLYENAR    |
| Pig                 | ECCDKPPLLEKSHCIAEAKRDELADLNPLEHDFVEDKEVCKNYEAKDVFLGTFFLYEYSR   |
| Alpaca              | ECCEKPLLEKSHCIAEAEERDEIPENLPAITDQFAEDKDVCKNYEAKDVFLGMFLHEYAR   |
| Bactrian camel      | ECCEKPLLEKSHCIAEAEERDEIPENLPAITEQFAEDKDVCKNYEAKDVFLGMFLHEYAR   |
| Dolphin             | KCCHKPLLEKSHCIAEVEKDELPELNSLLAADFAEDKEVCKNYEAKDVFLGTFFLYDYAR   |
| Killer whale        | KCCDKPPLLEKSHCIAEVEKDELPELNSPLAADFAEDKEVCKNYEAKDVFLGTFFLYEYAR  |
| Cow                 | ECCDKPPLLEKSHCIAEVEKDAIPENLPLTADFAEDKDVCKNYEAKDAFLGSFLYEYSR    |
| Sheep               | ECCDKPVLEKSHCIAEVDKDAVPENLPLTADFAEDKEVCKNYEAKDVFLGSFLYEYSR     |
| Goat                | ECCDKPVLEKSHCIAEVDKDAVPENLPLTADFAEDKEVCKNYEAKDVFLGSFLYEYSR     |
| Horse               | ACCDKPLLQKSHCIAEVEKEDDLPDLPALAADFAEDKEICKHYKDAKDVFLGTFFLYEYSR  |
| White rhinoceros    | ACCDKPLLQKSHCIAEVEGDELPSDLPPLAADFAEDKEVCKHFQDAKDVFLGTFFLYEYAR  |
| Cat                 | ECCGKPVLEKSHCIAEVERDELADLPPAADFVEDKEVCKNYEAKDVFLGTFFLYEYSR     |
| Dog                 | ECCDKPVLEKSHCLAEVERDELPGDLPPLAADFVEDKEVCKNYEAKDVFLGTFFLYEYSR   |
| Ferret              | ECCDKPPLLEKSHCLAEVERDELPGDLPPLAADFVEDKEVCKNYEAKDVFLGTFFLYEYSR  |
| Panda               | ECCDKPVLEKSHCLAEVEKDELPGDLPPLAADFVEDKEVCKNYEAKDVFLGTFFLYEYSR   |
| Pacific walrus      | ECCDKPPLLEKSHCLAEVERDELPGDLSPLAADFVEDKEVCKNYEAKDVFLGTFFLYEYSR  |
| Weddell seal        | ECCDKPPLLEKSHCLAEVERDELPGDLSPLAADFVEDKEVCKNYEAKDVFLGTFFLYEYSR  |
| Black flying fox    | ECCDKPPLLEKSHCLAEVENDDLPNDLPSITTFVEDKDVCKNYEAKDVFLGTFFLYEYSR   |
| Megabat             | ECCDKPPLLEKSHCLAEVENDDLPNDLPSITTFVEDKDVCKNYEAKDAFLGTFFLYEYSR   |
| Hedgehog            | SCCDKPPLLEKSHCLAEVEKEDDLPDLPALAADFAEDKEVCKNYEAKNIFLDTFLHEYAR   |
| Shrew               | KCCDKPPLLEKSHCLAEVEKEDDMPADLPSIADFAEDKEVCKNYEAKDVFLGTFFLYEYSR  |
| Star nosed mole     | ECCGKPIIEKSHCLAEVEKEDDMPADLPSIADFAEDKEVCKNYEAKDVFLGTFFLYEYSR   |
| Hyrax               | TCCDKPVLEKSHCLAEVEKEDDMPADLPSIADFAEDKEVCKNYEAKDAFLGSFLHEYAR    |

|                  |                                                               |
|------------------|---------------------------------------------------------------|
| Elephant         | ECCDKPVLAKSHCIAELDKDDPPADLPSIVPDYVEDKDVCKNYQEAKDIFLGTFLYEYSR  |
| Manatee          | GCCDKPVLEKSHCIEVEKDDVPAGLPPIAETYVEDKDVCKNYHEAKDIFLGTFLYEYSR   |
| Cape golden mole | DCCAQSVLEKSHCISEVEKDDIPADLPSIAVTYVDDKEVKCKNYAETKDLFLGMFLYEYAR |
| Tenrec           | ECCEKPVLEKSHCIAEVENDDIPDDLTPLAADFVEDKEVKCKNYEERDIFMGFLYEYAR   |
| Armadillo        | KCCDQPLSEKSHCIELEKDEAPADLPPINVDVDDKDVCKNYAEAKDVFLGMFLYEYAR    |
| Sloth            | QCCDKPLLEKSHCIEIEKDDLIADLPALTTDFADDKEVKCKHYAEAKDVFLGTFLYEYSR  |
| Opossum          | KCCDKSLVEKSQCIADLENDDLPADLPDFDETYVTSKEACQNYKEAKDLFLANYLYDSAR  |
| Tasmanian devil  | ECCDKPLIEKSQCIADLGNDAIPDGLPDLLAEYVNTKDACQNYKEAKDLFLATYLYDNGR  |
| Platypus         | TCCDKPLVVRSQCVVDLENDDTPADLPTMASIYVEDKEVCNNYAGAKDLFLATFLYDAR   |

|                     |                                                                |
|---------------------|----------------------------------------------------------------|
| Human               | RHPDYSVLLLLRLAKTYETTLEKCCAAADPHECYAKVFDEFKPLVEEPQNLIKQNCLEFE   |
| Chimpanzee          | RHPDYSVLLLLRLAKTYETTLEKCCAAADPHECYAKVFDEFKPLVEEPQNLIKQNCLEFE   |
| Bonobo              | RHPDYSVLLLLRLAKTYETTLEKCCAAADPHECYAKVFDEFKPLVEEPQNLIKQNCLEFE   |
| Gorilla             | RHPDYSVLLLLRLAKTYETTLEKCCAAADPHECYAKVFDEFKPLVEEPQNLIKQNCLEFE   |
| Orangutan           | RHPDYSVLLLLRLAKTYETTLEKCCAAADPHECYAKVFDEFKPLVEEPQNLIKQNCLEFE   |
| Gibbon              | RHPDYSVLLLLRLAKAYETTLEKCCAAADPHECYAKVFDEFKPLVEEPQNLIKHNCLEFE   |
| Rhesus              | RHPDYSVLLLLRLAKAYEATLEKCCAAADPHECYAKVFDEFQPLVEEPQNLVKQNCLEFE   |
| Crab-eating macaque | RHPDYSVLLLLRLAKAYEATLEKCCAAADPHECYAKVFDEFQPLVEEPQNLVKQNCLEFE   |
| Olive baboon        | RHPDYSVLLLLRLAKAYEATLEKCCAAADPHECYAKVFDEFQPLVEEPQNLVKQNCLEFE   |
| Marmoset            | RHPDYSAMLLLLRLAKAYEATLEKCCATADPHGCYAKVFDEFQPLVEDPQNLVKHNCLEFE  |
| Squirrel monkey     | RHPDYSVLLLLRLAKAYEATLEKCCATADPHGCYAKVFDEFQPLVEDPQNLVKHNCLEFE   |
| Tarsier             | -----NLVKQNCLEFE                                               |
| Mouse lemur         | RHPEQSPFVLLRVAKTYEATLEKCCAAADPHACYANV-----                     |
| Bushbaby            | RHPEYSVLLLLRLAKHYEATLEKCCATDDPHTCYAKVLDELQHDVEEPQNLVKQNCLEFE   |
| Chinese hamster     | RHHGDSTLMVLRI-KAYEATLERCCATADPPSCYGVMEEFKALSEEETHNLVKQNCLEFE   |
| Squirrel            | RHPEYGSLLLLRIAKAYEAKLEKCCAEADPPACYGKVFEEFEPLATEPQNVVKQNCLEFE   |
| Golden hamster      | RHPDYSVALLLRLAKKYEATLEKCCAEADPSACYGKVLDEFQPLVEEPKNLVKANCELEFE  |
| Mouse               | RHPDYSVLLLLRLAKKYEATLEKCCAEANPPACYGTVLAEFQPLVEEPKNLVKTNCLEFE   |
| Rat                 | RHPDYSVLLLLRLAKKYEATLEKCCAEADPPACYGTVLAEFQPLVEEPKNLVKTNCLEFE   |
| Naked mole rat      | RNPDYSIGMLLRLAKAYEAKLEKCCAEADPPACYATAFHELQPLIDEPKNLVQNCLEFE    |
| Guinea pig          | RHPEYSIGMLLRLAKAYEAKLEKCCAEADPHACYAKVFDRLQPLIDEPKNLVQNCLEFE    |
| Rabbit              | RHPDYSVLLLLRLGKAYEATLEKCCATDDPHACYAKVLDEFQPLVDEPKNLVKQNCLEFE   |
| Pika                | RHPDYPVTVLLKLAKEYEATLQKCCATDDPHACYAKVLDEFQPLVDEPKALIKQNCLEFE   |
| Pig                 | RHPDYSVLLLLRIAKTYEATLEDCCAKEDPPACYATVFDKQPLVDEPKNLIKQNCLEFE    |
| Alpaca              | RHPEYAVSLMLRIAKYEATLEDCCAKDDPHACYATVFDKLOHLADEPQNLVKQNCLEFE    |
| Bactrian camel      | RHPEYAVSLLLRIAKYEATLEDCCAKDDPHACYATVFDKLOHLADEPQNLVKQNCLEFE    |
| Dolphin             | RHPEYSVLLLLRIAKGYEATLEDCCAKDDPPACYATVFEKLRPLVEEPKNLIKQNCLEFE   |
| Killer whale        | RHPEYSVLLLLRIAKGYEATLEDCCAKDDPPACYATVFEKLRPLVEEPKNLIKQNCLEFE   |
| Cow                 | RHPEYAVSVLLRLAKYEATLECCAKDDPHACYSTVFDKHLVDEPQNLIKQNCLEFE       |
| Sheep               | RHPEYAVSVLLRLAKYEATLEDCCAKEDPHACYATVFDKHLVDEPQNLIKKNCLEFE      |
| Goat                | RHPEYAVSVLLRLAKYEATLEDCCAKEDPHACYATVFDKHLVDEPQNLIKKNCLEFE      |
| Horse               | RHPDYSVLLLLRLAKTYEATLEKCCAEADPPACYATVFDQFTPLVEEPKSLVKNCLEFE    |
| White rhinoceros    | RHPDYSVLLLLRIAKGYEATLEKCCVADDPPACYGKVFDELKTLVDEPVKLVKENCETYE   |
| Cat                 | RHPEYSVLLLLRLAKYEATLEKCCATDDPPACYAHVFDEFKPLVEEPHNLVKTNCLEFE    |
| Dog                 | RHPEYSVLLLLRLAKYEATLEKCCATDDPPTCYAKVLDEFKPLVDEPQNLVKTNCLEFE    |
| Ferret              | RHPEYSVLLLLRLAKYEATLEKCCATADPPSCYGVFDEFKPLVEEPQNLVKNCELEFE     |
| Panda               | RHPEYSVLLLLRLAKYEATLEKCCATDDPPTCYGKVLDEFKPLVEEPQNLVKANCELEFE   |
| Pacific walrus      | RHPEYAISSLLLRLAKYEATLEKCCATDDPPSCYGVLDEFKPLVEEPQNLVKTNCLEFE    |
| Weddell seal        | RHPEYAISSLLLRLAKYEATLEKCCATDDPPTCYGKVLDEFKPLVEEPQNLVKTNCLEFE   |
| Black flying fox    | RHPEYAVSLLLRIAKGYEATLERCCATDDAHACYSKVFDELQPLVDEPQKLMKRNCELEFE  |
| Megabat             | RHPEYAISSLLLRIAKGYEATLERCCATDDAHACYSKVFDELQPLVDEPQKLMKRNCELEFE |
| Hedgehog            | RHHDYSVLLLLRLAKTYEAKLEKCCPTADPHMCYGVFDDLKPLVEEPQKLVKENCLEFS    |
| Shrew               | RHPEYSVMLLRLAKGYEAVLEKCCATGDPQECYSRV-DELKPLIDEPQNLVKHNCLEFE    |
| Star nosed mole     | RHPEYSVLMLLRIAKGYEATLEKCCATDDPHSCYSKVFDELKPLVDEPQTLVKENCALFE   |
| Hyrax               | RHLDYSVIMLLRAAKDYEGTLERCCATDDPHACYAKVLDEIQ-LNDEPHNVVQTNCEKFE   |
| Elephant            | RHPEYSAFLLLRIAKYEATLERCCAAADPHACYAKVLDAFTPLVEEPQGLVKQNCHEFE    |
| Manatee             | RHPDYSMFLLLLRIAKAYEATLEKCCAAADPHACYAKVLDEFKPLIEEPQNLVKQNCLEFE  |
| Cape golden mole    | RHPEYSAFLLGRLVKKYEATLEKCCATDDPPTCYGKVLDELNTLVEEPQQRVVKQNCLEFE  |
| Tenrec              | RHHDYSVLLLLRLAKTYEAKLEKCCPTADPHMCYGVLEEMKPLIEEPQKLVKKNCDLFE    |
| Armadillo           | RHLDYPVALLLRLTKVYEAKLEKCCATDDPHACYSNVLEFQPLIDEPKDMVKNCLEFE     |
| Sloth               | RHLDFPITLLLRLAKTYEAKLEKCCATADPHACYSKVFDEFPQPIIDEPKMLVKHNCLEFE  |
| Opossum             | RGANLAVTLLLRIAKGYETTLECCATDDPPSCYAKVTLQRKAIIDDSNNLVKQNCLEFE    |
| Tasmanian devil     | RHPELAVTLLLRIAKDYETTLECCATADPPTCYAKAGEHRKNFIDESQNLIKENCLEFE    |
| Platypus            | RHTDFSSVLLLLRVAKGYQAKLTECCAGDDPNACLAKAAEELKTYVAETKALVKDNCLEFE  |

|                     |                                                                 |
|---------------------|-----------------------------------------------------------------|
| Human               | QLGEYKFNALLVRYTKKVPQVSTPTLVEVSRNLGKVGSKCKHPEAKRMPCAEDYLSVV      |
| Chimpanzee          | QLGEYKFNALLVRYTKKVPQVSTPTLVEVSRNLGKVGSKCKHPEAKRMPCAEDYLSVV      |
| Bonobo              | QLGEYKFNALLVRYTKKVPQVSTPTLVEVSRNLGKVGSKCKHPEAKRMPCAEDYLSVV      |
| Gorilla             | QLGEYKFNALLVRYTKKVPQVSTPTLVEVSRNLGKVGSKCKHPEAKRMPCAEDYLSVV      |
| Orangutan           | QLGEYKFNALLVRYTKKVPQVSTPTLVEVSRNLGKVGSKCKHPEAKRMPCAEDYLSVV      |
| Gibbon              | QLGEYKFNALLVRYTKKVPQVSTPTLVEVSRNLGKVGSKCKHPEAKRMPCAEDYLSVV      |
| Rhesus              | QLGEYKFNALLVRYTKKVPQVSTPTLVEVSRNLGKVGAKCKLPEAKRMPCAEDYLSVV      |
| Crab-eating macaque | QLGEYKFNALLVRYTKKVPQVSTPTLVEVSRNLGKVGAKCKLPEAKRMPCAEDYLSVV      |
| Olive baboon        | QLGEYKFNALLVRYTKKVPQVSTPTLVEVSRNLGKVGAKCKLPEAKRMPCAEDYLSVV      |
| Marmoset            | QFGEYKFNALLVRYTKKVPQVSTPTLVEVSRNLGKVGTKCKQPEAKRMPCVEDYLSVV      |
| Squirrel monkey     | QLGEYKFNALLVRYTKKVPQVSTPTLVEVSRNLGKVGTKCKQPEAKRMPCAEDYLSVV      |
| Tarsier             | EQGEYNFNALLVRYTKKVPQVSTPTLVEVSRNLGRVGTCKCKLSETQRMPCAEDY----     |
| Mouse lemur         | -----LIVRYTKKAPQVSTPTLVELSRKLGKGGTKCKLDESKRMGCTEDFLALV          |
| Bushbaby            | KLGEYGFQNALLVRYTKKVPQVSTPTLVEVSRSLGRVGSKCKMDEAKRMGCAEDYLSVV     |
| Chinese hamster     | QLGEYGFQNVLLIHYTKKSPQVQSTLVEIGRKLGSLSRCKHPEASERMHCAEYLSLV       |
| Squirrel            | QLGEYKFNALLIRYTKKAPQVSTPTLVEASRNLGRVGTCKCKLPEASHRMPCVEDYLSAI    |
| Golden hamster      | KLGEYGFQNALIVRYTKKAPQVSTPTLVEAARNLGRVGSKCKVLPQAQRLPCVEDYLSAI    |
| Mouse               | KLGEYGFQNALIVRYTKKAPQVSTPTLVEAARNLGRVGTCKCTLPEDQRLPCVEDYLSAI    |
| Rat                 | KLGEYGFQNALIVRYTKKAPQVSTPTLVEAARNLGRVGTCKCTLPQAQRLPCVEDYLSAI    |
| Naked mole rat      | KLGEYGFQNALVRYTKKIPQISTATLVEASRNLGKVGTKCCALPESKRLPCTENYLAII     |
| Guinea pig          | KLGEYGFQNALAVRYTKKAPQVSTPTLVEIARGLGKVGSKCKLPEAERLPCENYLAII      |
| Rabbit              | QLGDYFNQNALLVRYTKKVPQVSTPTLVEISRSLGKVGSKCKHPEAERLPCENYLAII      |
| Pika                | ELGEYNFNALLVRYTKKAPQVSTPTLVEIARGLGKVGSKCKLPEAERLPCVEDYLSVV      |
| Pig                 | KLGEYGFQNALIVRYTKKVPQVSTPTLVEVARKLGLVGSRCKRPEEERLSCAEDYLSLV     |
| Alpaca              | KLGEYGFQNDILVRYTKKLPQVSTPTLVEVARGLGRVGTCKCTLPESNRMSAEDYLSLV     |
| Bactrian camel      | KLGEYGFQNDILVRYTKKLPQVSTPTLVEVARGLGRVGTCKCTLPESNRMSAEDYLSLI     |
| Dolphin             | KLGEYQFNALLVRYTKKVPQVSTPTLVEVSRNLGRVGSKCKNPESESRMSAEDYLSLV      |
| Killer whale        | KLGEYQFNALLVRYTKKVPQVSTPTLVEVSRNLGRVGSKCKNPESESRMSAEDYLSLV      |
| Cow                 | KLGEYGFQNALIVRYTRKVPQVSTPTLVEVSRSLGKVGTRCCTKPESESRMPCTEDYLSLI   |
| Sheep               | KHGEYGFQNALIVRYTRKAPQVSTPTLVEISRSLGKVGTKCCAKPESESRMPCTEDYLSLI   |
| Goat                | KHGEYGFQNALIVRYTRKAPQVSTPTLVEISRSLGKVGTKCCAKPESESRMPCTEDYLSLI   |
| Horse               | EVGEYDFQNALIVRYTKKIPQVSTPTLVEIGRTLGRVGSRCKLPESESRLPSENHLALA     |
| White rhinoceros    | RLGEYDFQNELIVRYTHKVPQASTPTLVEISRKMGKVGTKCKVSEFPQRLPCSENYSLSLI   |
| Cat                 | KLGEYGFQNALLVRYTKKVPQVSTPTLVEVSRSLGKVGSKCCTHPEAERLSCAEDYLSVV    |
| Dog                 | KLGEYGFQNALLVRYTKKAPQVSTPTLVEVSRKLGKVGTKCKKPESESRMSCADDFLSVV    |
| Ferret              | KLGEYGFQNALLVRYTKKLPQVSTPTLVEVSRKLGKVGTKCCTKPESESRMSAEDYLAVV    |
| Panda               | KLGEYGFQNALLVRYTKKVPQVSTPTLVEVSRKLGKVGTKCCKKPESESRMSAEDYLSVV    |
| Pacific walrus      | KLGEYGFQNALLVRYTKKVPQVSTPTLVEVSRKLGKVGTRCCKKPESESRMPCAEDYLSVV   |
| Weddell seal        | KLGEYGFQNALLVRYTKKVPQVSTPTLVEVSRKLGKVGTRCCKKPDSESRMPCAEDYLSVV   |
| Black flying fox    | NLGAYGFQNALIIRYTKKMPQVSTPTLLVISKELANMGNKCTLPESKRMACAEDYLSLV     |
| Megabat             | NLGPYGFQNMILTIRYTKKMPQVSTPTLLVISKELANMGNKCTLPESKRMACAEDYLSLV    |
| Hedgehog            | TVGEYQFNALLVRYTKKIPQVSTPTLVDIVRKLGRVGTCCGLPESESRLLCAVDYLSLV     |
| Shrew               | NLQYGFQNALIIRYTKKMPQVSTPTLVEVSRNLGKVGTKCCSLAAGERLPCAEDYLSVV     |
| Star nosed mole     | NLGEYGFQNALIVRYTKKMPQVSTPSIVEVSRSLGKVGTKCCTRPESNRMACAEDFLSVV    |
| Hyrax               | KLGEYDFTNSLLVRYTRKTPQVSTPTLVKVARMGKVGSKCKLADSQRVACAEDY----      |
| Elephant            | QLGEYGFQNALIVRYTRKVPQVSTPTLVEVSRKLGKVGSKCKLAEAKRMPCAEDYLSLV     |
| Manatee             | HLGEYGFQNALIVRYTRKVPQVSTPTLVEVSRKLGKVGSKCKLAESESRMPCADDFLSVI    |
| Cape golden mole    | QLGEYGFQNALVRYTRKLPQVSTPTLVEVSRNLGRVGTCKCKLAETERMSAEDYLSLV      |
| Tenrec              | KIGEYGFQNALIIRYTKKMPQVSTPTLVETSRLGRVGTCKCSLPEAQKMPVEDHLSVI      |
| Armadillo           | QLGEYGFQNALIIRYTKKMPQVSTPTLVEISRKLGRTGSACCKRPEAERMSCVEEYLTLI    |
| Sloth               | QHGDYGFQNTLLIIRYTKKMPQVSTPTLVDISRRLGKTGTWCCCKPESESRLLSCVEEYLNLI |
| Opossum             | KAGEYGFANELVRYTKKMPQVSTPTVVELSQKLAKVGSKCKLSDDEKMGCAEGYLAIIV     |
| Tasmanian devil     | KVGEYGFENALLVRYTRKAPQVSTPTLLALGHKLAKVGSKCKVSDNEKLGCAEGYLAIIV    |
| Platypus            | KLGEYAFQNTLVRYTRKLPQVSTPTLLDVSSHLLARVGTCCCKLDEGHRLACADDYLALV    |

|                     |                                                              |
|---------------------|--------------------------------------------------------------|
| Human               | LNQLCVLHEKTPVSDRVTKCTESLVNRRPCFSALEVDETYVPKEFNAETFTFHADICTL  |
| Chimpanzee          | LNQLCVLHEKTPVSDRVTKCTESLVNRRPCFSALEVDETYVPKEFNAETFTFHADICTL  |
| Bonobo              | LNQLCVLHEKTPVSDRVTKCTESLVNRRPCFSALEVDETYVPKEFNAETFTFHADICTL  |
| Gorilla             | LNQLCVLHEKTPVSDRVTKCTESLVNRRPCFSALEVDETYVPKEFNAETFTFHADICTL  |
| Orangutan           | LNQLCVLHEKTPVSDRVTKCTESLVNRRPCFSALEVDETYVPKEFNAETFTFHADICTL  |
| Gibbon              | LNQLCVLHEKTPVSDRVTKCTESLVNRRPCFSALEVDETYVPKEFNAETFTFHADICTL  |
| Rhesus              | LNRLCVLHEKTPVSEKVTCKCTESLVNRRPCFSALELDEAYVPKAFNAETFTFHADMCTL |
| Crab-eating macaque | LNRLCVLHEKTPVSEKVTCKCTESLVNRRPCFSALELDEAYVPKAFNAETFTFHADMCTL |

|                  |                                                               |
|------------------|---------------------------------------------------------------|
| Olive baboon     | LNRLCVLHEKTPVSEKVTKCCESLVNRRPCFSALELDEAYVPKAFNAETFTFHADMCTL   |
| Marmoset         | LNQLCVLHEKTPVSDRVTKCCESLVNRRPCFSALEVDETYLPKAFNAETFTFHADMCTL   |
| Squirrel monkey  | LNQLCVLHEKTPVSDRVTKCCESLVNRRPCFSALTVDETYVPKAFNAETFTFHADMCTL   |
| Tarsier          | -----                                                         |
| Mouse lemur      | LNRLCVLHEKTPVSDRVTKCCESLADRRPCFSELEADETYVPKPFNAETFTFHADVCTL   |
| Bushbaby         | LNRLCVLHEKTPVSDRVTKCCESLVNRRPCFSALEVDETYVPKPFNAETFTFHADMCTL   |
| Chinese hamster  | LNKMC LAHEKAPVSDRITKCCESLVNRRPCFSALPPDDTFEPKFEADSFTFHADICTI   |
| Squirrel         | LNRTVCMHEKNPVSERITKCCSESVNKRACFSALSVDITYVPKPFHADTFTFHADICTL   |
| Golden hamster   | LNRVCVLHEKTPVSEQVTKCCGTVERRPCFSALPVDETYVPKPFKAETFTFHADICSL    |
| Mouse            | LNRVCLLHEKTPVSEHVTKCCSGSLVERRPCFSALTVDETYVPKPFKAETFTFHSDICTL  |
| Rat              | LNRLCVLHEKTPVSEKVTKCCSGSLVERRPCFSALTVDETYVPKPFKAETFTFHSDICTL  |
| Naked mole rat   | LNRLCVLHEKTPVSDRVTKCCESLVNRRPCFSALQDDETYVPKQFDTETFTIHADVCTL   |
| Guinea pig       | LNRLCILHEKTPVSEKVTKCCESLVNRRPCFSALHVDDETYVPKPFHADSTFTFHADICTL |
| Rabbit           | LNRLCVLHEKTPVSEKVTKCCESLVNRRPCFSALGPDDETYVPKPFNAETFTFHADICTL  |
| Pika             | LNRFVCLHEKTPVSEGVTKCCESLVNRRPCFSALTPDSTYVPKPFHVETFTFHADICTL   |
| Pig              | LNRLCVLHEKTPVSEKVTKCCESLVNRRPCFSALTPDETYVPKPFVEGTFTHADLCTL    |
| Alpaca           | LNRLCVLHEKTPVSPRVTKCCESLVNRRPCFSSLAADETYEPKPFDDKTFTFHADLCSV   |
| Bactrian camel   | LNRLCVLHEKTPVSPRVTKCCESLVNRRPCFSSLTAADETYEPKPFDEKTFTFHADLCSV  |
| Dolphin          | LNRLCVLHEKTPVSEKVTKCCESLVNRRPCFSALTVDETYEPKAFDEKTFTFHADLCTL   |
| Killer whale     | LNRLCVLHEKTPVSEKVTKCCESLVNRRPCFSALTVDETYEPKAFDEKTFTFHADLCTL   |
| Cow              | LNRLCVLHEKTPVSEKVTKCCESLVNRRPCFSALTPDETYVPKAFDEKLTFTFHADICTL  |
| Sheep            | LNRLCVLHEKTPVSEKVTKCCESLVNRRPCFSALTPDETYVPKPFDEKFTFTFHADICTL  |
| Goat             | LNRLCVLHEKTPVSEKVTKCCESLVNRRPCFSALTPDETYVPKPFDEKFTFTFHADICTL  |
| Horse            | LNRLCVLHEKTPVSEKVTKCCESLVNRRPCFSALTPDETYVPKPFDEKFTFTFHADICTL  |
| White rhinoceros | LNRLCVLHEKTPVSEKVTKCCESLVNRRPCFSALQDDETYIPKPFNAETFTFHADICTL   |
| Cat              | LNRLCVLHEKTPVSEKVTKCCESLVNRRPCF-ALQVDETYVPKPFSAETFTFHADLCTL   |
| Dog              | LNRLCVLHEKTPVSEKVTKCCESLVNRRPCFSGLEVDETYVPKPFNAETFTFHADLCTL   |
| Ferret           | LNRLCVLHEKTPVSDRVTKCCESLVNRRPCFSALAGDETYVPKPFNAETFTFHADLCTL   |
| Panda            | LNRLCVLHEKTPVSEKVTKCCESLVNRRPCFSALEVDETYVPKPFNAETFTFHADLCTL   |
| Pacific walrus   | LNRLCVLHEKTPVSEKVTKCCESLVNRRPCFSALEVDEAYVPKPFNAETFTFHADLCTL   |
| Weddell seal     | LNRLCVLHEKTPVSEKVTKCCESLVNRRPCFSALEIDEAYVPKPFNAETFTFHADLCTL   |
| Black flying fox | LNRLCVLHEKTPVSDKITKCCESLVNRRPCFSSLEADETYVPKPFNAETFTFHADVCTL   |
| Megabat          | LNRLCVLHEKTPVSDKITKCCESLVNRRPCFSSLEADETYVPKPFNAETFTFHADVCTL   |
| Hedgehog         | LNHLCVLHEKTPVSDKITKCCESLVNRRPCFSALEADETYVPKPFSAETFTFHADICTL   |
| Shrew            | LNRLCVLHDKTPVSDKITKCCESLVNRRPCFSALEADETYVPKPFNAEMFTFHADICTL   |
| Star nosed mole  | LNRLCVLHEKTPVSEKVTKCCESLVNRRPCFSALQDDETYVPKPFNAETFTFHADICTL   |
| Hyrax            | -----PVSDKITKCCESL-NRRPCFTALE-DDTYVPKPFSAETFTFHADLCTL         |
| Elephant         | LNRLCVLHEKTPVSEKVTKCCESLVNRRPCFTALQDDETYVPKPFNAETFTFHADLCTL   |
| Manatee          | LNRLCVLHEKTPVSEKVTKCCESLVNRRPCFTALHADETYVPKPFNDETFTFHADLCTL   |
| Cape golden mole | LNRLCVLHEKTPVSEKVTCCNSLVYRRPCFSALEVDETYAPKPFSAETFTFHSDLCTL    |
| Tenrec           | LNWLCVLHEKTPVSEKVTKCCESLVNRRPCFSALEVDETYVPKPFIPETFTFHAELCTL   |
| Armadillo        | LNHLCVLHEKTPVSEVTKCCESLVNIRPCFSALPPNEAYVPKPFSA-TFTFHAELCTL    |
| Sloth            | LNRLCVLHEKTPVSEQVTKCCESLVNRRPCFSALPPKEDYVPKPFNATFTFHADICEL    |
| Opossum          | VDKLCRQHEKTPVSDKITKCCESLVNRRPCFTALGVDETYEPKAFSADTFTFHADLCTL   |
| Tasmanian devil  | IDNLCRLHEKTPVSDRITKCCESLVNRRPCFSALGVDDTYVAKPFSADTFTFHADLCTL   |
| Platypus         | LDKMCRLHEKTPVSDRVTKCCESLADRRPCFSALEVDETYVPKPFNAETFTFHADLCTL   |

|                     |                                                             |
|---------------------|-------------------------------------------------------------|
| Human               | SEKERQIKKQ TALVELVKHKPKATKEQLKAVMDDFAAFVEKCKKADKETCFAEEGKKL |
| Chimpanzee          | SEKERQIKKQ TALVELVKHKPKATKEQLKAVMDDFAAFVEKCKKADKETCFAEEGKKL |
| Bonobo              | SEKERQIKKQ TALVELVKHKPKATKEQLKAVMDDFAAFVEKCKKADKETCFAEEGKKL |
| Gorilla             | SEKERQIKKQ TALVELVKHKPKATKEQLKAVMDDFAAFVEKCKKADKETCFAEEGKKL |
| Orangutan           | SEKERQIKKQ TALVELVKHKPKATKEQLKAVMDDFAAFVEKCKKADKETCFAEEGKKL |
| Gibbon              | SEKDRQVKKQ TALVELVKHKPKATKEQLKAVMDDFAAFVEKCKKADKETCFAEEGKKL |
| Rhesus              | SEKEKQVKKQ TALVELVKHKPKATKEQLKAVMDDFAAFVEKCKKADKETCFAEEGKKL |
| Crab-eating macaque | SEKEKQVKKQ TALVELVKHKPKATKEQLKAVMDDFAAFVEKCKKADKETCFAEEGKKL |
| Olive baboon        | SEKEKQVKKQ TALVELVKHKPKATKEQLKAVMDDFAAFVEKCKKADKETCFAEEGKKL |
| Marmoset            | SEKEKQVKKQ TALVELVKHKPKATNEQLKAVMDDFAAFVEKCKKADKETCFAEEGKKL |
| Squirrel monkey     | SEKAQQVKKQ TALVELVKHKPKATKEQLKAVMDDFAAFVEKCKKADKETCFAEEGKKL |
| Tarsier             | -----ALVELVKHKPKATEEQLKAVMDDFAAFVEKCKKADKETCFAEEGKKL        |
| Mouse lemur         | PEKEKQIKKQ TALVELVKHKPKATDEQLKAVMDDFAAFVEKCKKADKETCFAEEGKKL |
| Bushbaby            | PDTEKQIKKQ TALVELVKHKPKATNDQLKAVMDDFAAFVEKCKKADKETCFAEEGKKL |
| Chinese hamster     | PDTEKQIKKQ TALVELVKHKPKATNDQLKAVMDDFAAFVEKCKKADKETCFAEEGKKL |
| Squirrel            | PETEQQIKKQ TALVELVKHKPKATIDQLKAVMDDFAAFVEKCKKADKETCFAEEGKKL |
| Golden hamster      | PEKEKQIKKQ TALVELVKHKPKATGQQLKAVMDDFAAFVEKCKKADKETCFAEEGKKL |
| Mouse               | PEKEKQIKKQ TALVELVKHKPKATAEQLKAVMDDFAAFVEKCKKADKETCFAEEGKKL |



|                  |                                                                 |
|------------------|-----------------------------------------------------------------|
| Rat              | PDKEKQIKKQTALAEVLKHKPKATEDQLKTVMGDFAQFVDKCCKAADKDNCFATEGPNLV    |
| Naked mole rat   | PEEEQOIMKQMTLAEVLKHKPKATAEQMKDIMKNFGIFLEKCCHAENKDDCFSEKGSNFV    |
| Guinea pig       | PEKEKQVKKQMALVELVKHKPKASEEQMKTVMGDFAAFLKCCDADNKEACFTEDGPKLV     |
| Rabbit           | PETERKIKKQTALVELVKHKPHATNDQLKTVVGEFTALLDKCCSAEDKEACFAVEGPKLV    |
| Pika             | PQHKREYKKQKALVELVKYKPSATKEQLKVVGDFTAMVEKCCAADDKEACFSEEWKTCV     |
| Pig              | PEDEKQIKKQTALVELLKHKPHATEEQLRTVLGNFAAFVQKCCAAPDHEACFAVEGPKFV    |
| Alpaca           | SEPEKQIKKQ-ALAEVLKHKPKATDEQLKTVMEKFVAFVEKCCAADVKEGCFVSEGTSC     |
| Bactrian camel   | SEPEKQIKKQTALAEVLKHKPKATDEQLKTVMEKFVAFVDKCCAADVKEACFTVEGPLLV    |
| Dolphin          | PENEKQIKKQIALVELVKHKPKVTEEQLKTVMGDFAAFVDKCCAADDKEACFALEGPKLV    |
| Killer whale     | PENEKQIKKQIALVELVKHKPKVTEEQLKTVMGDFAAFVDKCCAADDKEACFALEGPKLV    |
| Cow              | PDTEKQIKKQTALVELLKHKPKATEEQLKTVMENFVAFVDKCCAADDKEACFAVEGPKLV    |
| Sheep            | PDTEKQIKKQTALVELLKHKPKATDEQLKTVMENFVAFVDKCCAADDKEGCFVLEGPKLV    |
| Goat             | PDTEKQIKKQTALVELLKHKPKATDEQLKTVMENFVAFVDKCCAADDKEGCFLLEGPKLV    |
| Horse            | PEDEKQIKKQSALAEVLKHKPKATKEQLKTVLGNFSAFVAKCCGAEDKEACFAEEGPKLV    |
| White rhinoceros | PDDEKKIKKQTALVELVKHKPKATNEQLKAVIEDFAAFINKCCAENKEACFAEEGPKLV     |
| Cat              | PEAEKQIKKQSALVELLKHKPKATEEQLKTVMGDFGSFVDKCCAEDKEACFAEEGPKLV     |
| Dog              | PEAEKQVKKQTALVELLKHKPKATDEQLKTVMGDFGAFVEKCCAENKEGCFSEEGPKLV     |
| Ferret           | PDAEKQVKKQSALVELLKHKPKATEEQLKTVMGDFGAFVDKCCAENKEGCFAEEGPKLV     |
| Panda            | PEAEKQVKKQSALVELLKHKPKATEEQLKTVMGDFGAFVDKCCAENKEGCFAEEGPKLV     |
| Pacific walrus   | PEAEKQIKKQSALVELVKHKPKATEEQLKTVMGDFGAFVEKCCAEEKEACFAEEGPKLV     |
| Weddell seal     | PEAEKQVKKQSALAEVLKHKPKATEEQLKTVMGDFGAFVEKCCAENKEACFAEEGPKLV     |
| Black flying fox | PDHEKHLKTQTALVELLKHKPKAADEQLKTVMGDFSAFIEKCCCTADDKEACFAEEGPKLV   |
| Megabat          | PDSEKHLKQTALVELLKHKPKATDEQLKTVMGDFSAFIEKCCCTADDKEACFAEEGPKLV    |
| Hedgehog         | PDTEKEIKKQTTLVELLKHKPKATDAQLKTVMGDFTAFLTKCCAEDKEACFAEEGPTCC     |
| Shrew            | PDSEKQFKKQAAALVELLKHKPKATEEQLKPVMAEFVAFVEKCCGAEDKEACFATEGPKLI   |
| Star nosed mole  | PEAEKQIKKQSALVELLKHKPKATGDQLKTVMGDFGGFIEKCCASDDKETCFSTEGPKLV    |
| Hyrax            | PDDQKQSKKQTVLVELLKHKPKATDEQLKVVIGLFAVVEKCCAEDKEACFVGEAKTCY      |
| Elephant         | PEDQKQIKKQSVLVELVKHKPKATDEQLKTVTGQFTGMVEKCCAEDKEACFAEEGPKLV     |
| Manatee          | PEDQKQIKKQTVLVELLKHKPKATDDKLKTVIGEFVAMVEKCCKADSFEACFTLEGPKLV    |
| Cape golden mole | PEDQKQTKKQTVLVELVKHKPKATDDQLKVVAGEFSAMVEKCCKVEDHEVCFAEEGPKLV    |
| Tenrec           | PDDQKQIKKQSVLAEVLKHKPKATATEDALKAVSGEFVIMMEKCCCTDADQEGCFGREGPTCG |
| Armadillo        | P-DE--I---TLVELVKHKPKATYDQIKVVMDFVAMVEKCCKAENKEACFAEEGPKLV      |
| Sloth            | SEEEKQIKKQVVLAEVLKHKPKATDEQLKTVKEKVTGFLDKCCHAENKEACFIAEQNIH     |
| Opossum          | PEEEKQTKKQTVLAEVLKHKPKITDQLKAVISDFVAFVDKCCKADSQEGCFEEDGPKLV     |
| Tasmanian devil  | PEEEKQDKKQGIIVELVKHKPKITDQLKGVITDFTAFVDKCCKADNQEACFAEDGPKLV     |
| Platypus         | PEDQKAKKQSVLVELVKHKPKATDDQLKGVITDFTAMVTKCCGEADKEACFATEGANLV     |

|                     |           |
|---------------------|-----------|
| Human               | AASQAAL-  |
| Chimpanzee          | AASQAAL-  |
| Bonobo              | AASQAAL-  |
| Gorilla             | AASQAAL-  |
| Orangutan           | AASQAAL-  |
| Gibbon              | AASQAAL-  |
| Rhesus              | AASQAAL-  |
| Crab-eating macaque | AASQAAL-  |
| Olive baboon        | AASQAAL-  |
| Marmoset            | AASETAL-  |
| Squirrel monkey     | AESQAAL-  |
| Tarsier             | KASQPSG-  |
| Mouse lemur         | KAYQPTL-  |
| Bushbaby            | AESQAAL-  |
| Chinese hamster     | CATQPAL-  |
| Squirrel            | AASQAAL-  |
| Golden hamster      | ASSQAAL-  |
| Mouse               | TRCKDAL-  |
| Rat                 | ARSKEAL-  |
| Naked mole rat      | QACKDTF-  |
| Guinea pig          | AKCQATL-  |
| Rabbit              | ESSKATL-  |
| Pika                | KQSQTLP-  |
| Pig                 | TEIRGIL-  |
| Alpaca              | CASQPTL-  |
| Bactrian camel      | AATRITALA |
| Dolphin             | VKTREAI-  |
| Killer whale        | VTREAI-   |

|                  |          |
|------------------|----------|
| Cow              | VSTQTAL- |
| Sheep            | ASTQAAL- |
| Goat             | ASTQAAL- |
| Horse            | ASSQLAL- |
| White rhinoceros | AKSQTALL |
| Cat              | AAAQAAL- |
| Dog              | AAAQAAL- |
| Ferret           | AAAQAAL- |
| Panda            | ATAQAAL- |
| Pacific walrus   | ATAQAAL- |
| Weddell seal     | AKAQAALA |
| Black flying fox | ASSQATLA |
| Megabat          | ASSQATLA |
| Hedgehog         | VVSQPSL- |
| Shrew            | ASSQAALA |
| Star nosed mole  | AAAQAAL- |
| Hyrax            | KASQPTL- |
| Elephant         | TASQAAL- |
| Manatee          | ATSKAAL- |
| Cape golden mole | AAAQATLA |
| Tenrec           | SVFQPI-  |
| Armadillo        | KEAEPTL- |
| Sloth            | NQASPTL- |
| Opossum          | ASAQAAL- |
| Tasmanian devil  | ATTQAAL- |
| Platypus         | TKSKAALA |

## VITAMIN D-BINDING PROTEIN (GC)

|                     |                                                               |
|---------------------|---------------------------------------------------------------|
| Human               | MKRVLVLLLAVAFGHALERGRDYEKNKVCKEFSHLGKEDFTSLSLVLYSRKFPSGTFEQV  |
| Chimpanzee          | MKRVLVLLLAVAFGHALERGRDYEKNKVCKEFSHLGKEDFTSLSLVLYSRKFPSGTFEQV  |
| Bonobo              | MKRVLVLLLAVAFGHALERGRDYEKNKVCKEFSHLGKEDFTSLSLVLYSRKFPSGTFEQV  |
| Gorilla             | MKRVLVLLLAVAFGHALERGRDYEKNKVCKEFSHLGKEDFTSLSLVLYSRKFPSGTFEQV  |
| Orangutan           | MKRVLVLLLAVAFGHALERGRDYEKNKVCKEFSHLGKEDFTSLSLVLYSRKFPSGTFEQV  |
| Gibbon              | MKRVLVLLLAVAFGHALERGRDYEKNKVCKEFSHLGKEDFTSLSLVLYSRKFPSGTFEQV  |
| Rhesus              | MKRVLVLLLAVAFGHALERGRDYEKNKVCKEFTHLGKEDFTSLSLVLYSRKFPSGTFEQV  |
| Crab-eating macaque | MKRVLVLLLAVAFGHALERGRDYEKNKVCKEFTHLGKEDFTSLSLVLYSRKFPSGTFEQV  |
| Olive baboon        | MKRVLVLLLAVAFGHALERGRDYEKNKVCKEFTHLGKEDFTSLSLVLYSRKFPSGTFEQV  |
| Marmoset            | MKALVLLLAVAFGHALERGRDYEKDKVCKEFDLGGKDFDFTSLSLVLYSRKFPSGTFEQI  |
| Squirrel monkey     | MKKVLVLLLAVAFGHALERGRDYEKDKVCKEFDLGGKEDFTSLSLVLYSRKFPSGTFEQI  |
| Tarsier             | MKRVLVLLFAVAFGHALERGRDYEKDKVCKEFTNLGKDDFTSLSLVQYSRKFPSGTFEQV  |
| Mouse lemur         | -----RDYEKDKVCKEFANLGGKDDFTSLSLVLYSR-FLS-TFEQV                |
| Bushbaby            | -----GRDYEKDKVCKEFAHLGGKDEFDFTSLSLVLYSRKFPSGTFEQV             |
| Chinese tree shrew  | MKGVLVLLLAALGHALERGRDYEKEKVKCEFISLGGKEDFTTSLSLVLYSRKFPSGTFEQI |
| Squirrel            | MKRVLVFLAVAFGHALERGRDYEKEKVCQELASLGGKDDFRSLSLVLYSRKFSSGTFEQV  |
| Ground squirrel     | MKRVLVFLAVAFGHALERGRDYEKEKVCQELASLGGKDDFRSLSLVLYSRKFSSGTFEQV  |
| Golden hamster      | MKRVVALLLVLALGHALERGRDYEKDKVCKELAMLGGKDDFRSLSLVLYSRKFPSGTFEQV |
| Kangaroo rat        | -----RDYEKDKVCKELAMLGGKEDFRSLALVLYSRKFSRGTFEQV                |
| Mouse               | MKRVLVLLLALAFGHALERGRDYEKDKVCNELAMLGGKEDFRSLSLVLYSRKFSSSTFEQV |
| Rat                 | MKRVLVLLLALAFGHALERGRDYEKDKVCQELSTLGGKDDFRSLSLVLYSRKFSSSTFEQV |
| Naked mole rat      | MKTVLVLLLTVALGHALERGRDYERDKVCKELTQLGGKDDFRSLSLVLYSRKFSSGTFEQV |
| Guinea pig          | MES-LLLCLPVLCLKLGKDFERDKVCKELTNLGGKDEFRTLSLILYSRKFPSGTFEQV    |
| Rabbit              | MKRVLVLLLAVVCGHALERGRDYEKDKVCKELATLGGKDDFRSLSLVLYSRKFPSGTFDQV |
| Pika                | MK-ILVLLLALAYGHALERGRDYEKDKVCKELASLGGKDDFRSLSLVLYSRKFPSGTFEQV |
| Pig                 | -----RDYEKDKVCKELASLGGKDDFTSLSMVLYSRKFPSGTFEQI                |
| Alpaca              | MKRILVFLAVACVRALERGQDYEKDKVCKELASLGGKDDFTSLSMVLYSRKFPSGTFEQV  |
| Bactrian camel      | MAKGLSCLLSAVLFSPLQGRDYEKDKVCKELASLGGKDDFTSLSMVLYSRKFPSGTFEQI  |
| Dolphin             | MKRILVFLAVAFVHALERGRDYEKDKVCKELASLGGKDDFTSLSMVLYSRKFPSATFEQI  |
| Killer whale        | MKRILVFLAVAFVHALERGRDYEKDKVCKELASLGGKDDFTSLSMVLYSRKFPSATFEQI  |
| Cow                 | MKRILVFLAVAFVHALERGRDYEKDKVCKDLASLGRDDFTSLSMVLYSRKFPSGTFEQI   |
| Sheep               | MKRILVFLAVAFVHALERGRDYEKDKVCKELASLGGKEDFTSLSMVLYSRKFPSGTFEQI  |
| Goat                | MKRILVFLAVAFVHALERGRDYEKDKVCKELASLGGKEDFTSLSMVLYSRKFPSGTFEQI  |
| Horse               | MKRIPVLLAVAFVHALERGRDYEKDKVCKEFTSLGGKDDFTSLSMVLYSRKFPSGTFEQI  |
| White rhinoceros    | MKKILAVLLAVAFVHTLERGRDYEKDKVCKELASLGGKDDFATLSMVLYSRKFPSGTFEQI |
| Cat                 | MKRILVLLAVAFVHALERGRDYEKDKVCKELANLGGKDDFTSLSMVSYSRKFPSSTFEQI  |

Dog MKTNIFVLLSII IYSRPOKGRDYEKEKVKCKELANLGKDDFTSLSMVLYSRKFPSSTFEQI  
 Ferret MKGILVLLLAVAVVHALERGRDYEKDKVKCKELANLGKDDFASLSMVLYSRKFPSGTFEQI  
 Panda MKRTLVLVLLAVAFVHALERGRDYEKDKVKCKELANLGKEDFTSLSMVLYSRKFPSSTFEQI  
 Pacific walrus MKVILVLLLAVAFVHALERGRDYEKDKVKCKELASLGKEDFTSLSMVLYSRKFPSGTFEQI  
 Weddell seal MKVILVLLLAVAFVHALERGRDYEKDKVKCKELASLGKEDFTSLSMVLYSRKFPSGTFEQI  
 Megabat -----SAGR DYEKDKVKCKELSNLGKDDFTSLSMVLYSRKFPSGTFEQV  
 David's myotis MKRILFLLLTV---HALERGREYKDKVKCKELNNGKDDFTSLSMVLYSRKFPSGTFEQI  
 Microbat MKRILFLLLTV---HALERGREYKDKVKCKELINFGKDDFTALS MVLYSRKFPSGTFEQI  
 Hedgehog -----KDYEKDKVKCKELAQMKGDDFRSLSI ILYSRKFPSGTFEQI  
 Shrew MKTALILLLALAGVHALERGREYKDKVKCKELAHLGKDGFRS-----NGEFSFGTFEQI  
 Star nosed mole MQRSRHKNVEMMKGTS PDRCDYEKDKVKCKELS ILGKDDFRSLSMVLYSRKFPGGTFEQV  
 Elephant -----GRDYEKDKVKCKELSNLGKDDFRSLSMVLYSRKFPSGTFEQV  
 Hyrax -----GKEDFRSLSMVLYSRKFPSGTFEQV  
 Cape golden mole -----RDYEKDKVKCKELSNLGKDDFRSLSMVLYSRKFPSGTFEQV  
 Tenrec MKGVLGLLLMVSFVHALERGRDYEKSKVCAELSNLGKDDFRSLSMI SYSRKFASGTFEQV  
 Armadillo MKGILFLLFAVGFGHAIERGRDYEKSKVCKELADLGKDDFRFLSMVLYSRKFPSGTFFQV  
 Sloth -----SMVLYSRKFPSGTFEQV  
 Tasmanian devil MSRIMLLLLSVTF IQADYRGRDYEKSKVCKEFANLGKDDFRSLSFVLYSRKFPSGTFEQV  
 Platypus MRGFPILLLTLALAQALHRGRDYEKEKVCREFASLGKDDFRSLSI VMHSSKYPRASFEV

Human SQLVKEVVS L TEACCAEGADPDCYDTRTSALS AKSCESNS PFPVHPGTAECC TKEGLERK  
 Chimpanzee SQLVKEVVS L TEACCAEGADPDCYDTRTSALS AKSCESNS PFPVHPGTAECC TKEGLERK  
 Bonobo SLLVKEVVS L TEACCAEGADPDCYDTRTSALS AKSCESNS PFPVHPGTAECC TKEGLERK  
 Gorilla SQLVKEVVS L TEACCAEGADPDCYDTRTSALS AKSCESNS PFPVHPGTAECC TKEGLERK  
 Orangutan SQLVKEVVS L TEACCVGADPDCYDTRTSALS AKSCESKSPFPVHPGTAECC TKEGLERK  
 Gibbon SQLVKEVVS L TEACCVGADPDCYDTRTSALS AKSCESNS PFPVHPGTAECC TKEGLERK  
 Rhesus SQLVKEVVS L TEACCAEGADPDCYDTRTSALS AKSCESNS PFPVHPGTAECC TTEGLERK  
 Crab-eating macaque SQLVKEVVS L TEACCAEGADPDCYDTRTSALS AKSCESNS PFPVHPGTAECC TTEGLERK  
 Olive baboon SQLVKEVVS L TEACCAEGADPDCYDTRTSALS AKSCESNS PFPVHPGTAECC TREGLERK  
 Marmoset TKLV E EVVS L TETCAEGADPDCYDTRTSALS AKSCERNSPFPVHPGTAECC TKEGLERK  
 Tairair monkey TKLV E EVVS L TETCAEGADPDCYDTRTSALS AKSCESNS PFPVHPGTAECC TKEGLERK  
 Sarsier SQLVNEVVS L TETCCANWADPDCYETQTSALS AKSGENDSPFPVHPGNVECC TKEDQEKK  
 Mouse lemur SQLV - EVVFL TEACCAEA - DDCYDS - -----LERK  
 Bushbaby KQLVTEVVS L TEACCAEGANPDCYDNRTSALS ARS CERDSPFPVHPGTAECCAREGLERK  
 Chinese tree shrew SQLVKEVVS L TETCAEGADPDCYDTRTSALS ARS CESDSPFPVHPGTPECCTKEGLEQK  
 Squirrel SQLVKEVVS L TEDCAEGADPDCYDTRTSALS AKSCESDSPFPVHSGTPECCTKEGLERK  
 Ground squirrel SQLVKEVVS L TEDCAEGADPDCYDTRTSALS AKSCESDSPFPVHSGTPECCTKEGLERK  
 Golden hamster SQLVKEVVS L TEACCAEGADPDCYDTRTSEL SVKSCASDAPFPVHPGTPECCTQEGLERK  
 Kangaroo rat SQLVKDVVS L TEACCAKADPDCYDTRTSEL SVKSCETDSPFPVHPGTSECCSKEGLERK  
 Mouse NQLVKEVVS L TEACCAEGADPDCYDTRTSEL SVKSCESDAPFPVHPGTPECCTKEGLERK  
 Rat SQLVKEVVS L TEACCAEGADPDCYDTRTSEL SVKSCESDAPFPVHPGTPECCTKEGLERK  
 Naked mole rat SQLVQEVVAL TEACCAEGADPDCYDTRTSALS AKSCESDSPFPVHPGTPECCTKEGLERK  
 Guinea pig SQLVQEVVAL TEACCAEGAAPDCYDRTAALS AKSCESDSPFPVHPGTAECCAREGLERK  
 Rabbit MKLVKEVVS L TEDCAEDADPGCYDNRTSALS ATSCESDSPFPVHPGTAECC TKEGLERK  
 Pika TQLVKQVVS L TEDCAEDADPDCYDRTTALS VLS CASDSPFPEHPGTAECC TREGLERK  
 Pig SHLVNEVVS L TEACCAEGADPDCYDNRTSALS DKSCESDSPFPVHPGTAECC TKEGLEKK  
 Alpaca SHLVSEVVS L TEACCTEEADPDCYDNRTSALS AKSCSDSPFPVHPGTAECC TKEGLERK  
 Bactrian camel SHLVNEVVS L TEACCTEEADPDCYDNRTSALS AKSCESDSPFPVHPGTAECC TTEGLERK  
 Dolphin SHLVNEVVS L TEACCAEGADPDCYDNRTSALS AKSCESDSPFPVHPGTPECCTKEGLEKK  
 Killer whale SHLVNEVVS L TEACCAEGADPDCYDNRTSALS AKSCESDSPFPVHPGTPECCTKEGLEKK  
 Cow SHLVNEVVS L TITCCAEGADPDCYDNRTSALS DKSCESNSPFPVHPGTPECCTHEGLEKK  
 Sheep SHLVNEVVS L TITCCAEGADPDCYDNRTSALS DKSCESNSPFPVHPGTPECCTHEGLEKK  
 Goat SHLVNEVVS L TITCCAEGADPDCYDNRTSALS DKSCESNSPFPVHPGTPECCTHEGLEKK  
 Horse SNLVNEVVS L TEACCAEGADPGCYDNRTSALS SVKSCESDSPFPVHPGTPECCTKEGLERK  
 White rhinoceros SNLVNEVVS L TEACCAEGANPDCYDNRTSALS SVKSCESDSPFPVHPGTAECC TKEGLERK  
 Cat SHLVNEVVS L TEACCAEGADPDCYDLRTSALS AKSCESDSPFPVHPGTAECC TKEGLEQK  
 Dog SHLVNEVVS L TETCAEGADPDCYDHRTSALS ARS CEKDSPFPVHPGTAECC TREGLERK  
 Ferret SQLVKEVVS L TETCAEGADPDCYDRRTSALS ARS CEKDSPFPVHPGTAECC TREGLERK  
 Panda SHLVNEVVS L TEACCAEGADPECYDLRTSALS ARS CEKDSPFPVHPGTAECC TREGLERK  
 Pacific walrus CHLVNEVVS L TEACCAEGADPDCYDRRTSALS ARS CEKDSPFPVHPGTAECC TREGLEQK  
 Weddell seal CHLVNEVVS L TEACCAEGADPDCYDRRTSALS ARS CEKDSPFPVHPGTAECC TREGLEQK  
 Megabat SHLVKEVVS L TEACCAEEADPDCYDNRTSALS AKSCESDAPFPVHPGTAECC TQEGLERK  
 David's myotis SHLVKEVVS L TEACCAEGADPDCYDNRTSALS AKSCSDSPFPVHPGTAECC TQEGLERK  
 Microbat SHLVKEVVS L TEACCAEGADPDCYDNRTSALS AKSCESDSPFPVHPGTAECC TQEGLERK  
 Hedgehog SHLVNEVVS L TEACCAEGADSDCYDNRTSALS AKSCESNSPFPVHPGTPECCEA QEGLEQK

|                  |                                                               |
|------------------|---------------------------------------------------------------|
| Shrew            | THHIDEVVSMTEDCCAPGSDPGCYDSRTSALSSEKSCESDSPFPVHPGTSECCASEGLERK |
| Star nosed mole  | QQLVNEVVSLTEDCCAEGADPCYDTRTSALSARSCESDAPFPVHPGTAECCREGLEQK    |
| Elephant         | SQLVNEVVSLTEDCCAEGADPCYDTRTSALSISKSCESDSPFPVHPGTAECCTEEGLERK  |
| Hyrax            | SQLVNEVVSLTECCAEGADPGCYDNRTSALS SVKSCESDSPFPVHPGTAECCTEEGLERK |
| Cape golden mole | RKLVEEVVSLTEDCCAEEADPCYDNRTSALS SVKSCESDSPFPVHPGTAECCTEEGLERK |
| Tenrec           | KQLVQAVVSLTEDCCAEGADPNCYDDRTSALSARSCEQGSFPFPVHPGTAECCTEEGLERK |
| Armadillo        | RQLVNEVVSLTEACCADGADPCYDNRTSALS AKSCERDSPFPVHPGTAECCTEEGLERK  |
| Sloth            | SQLVNEVVSLTECCAEGADPCYDKRTSALS AKSCESDSPFPVHPGTAECCTEEGLERK   |
| Tasmanian devil  | KALVNEVVSLTETCCDVNADPNCYDTRTSELS AKSCEKDAPYKHPETDKCCTFEGLERK  |
| Platypus         | IALVNEVVSLTETCCAQADPCYDEGASALS AKSCEKDSFPFRHPDVAECCAKGGLERK   |

|                     |                                                               |
|---------------------|---------------------------------------------------------------|
| Human               | LCMAALKHQEQEFPTYVEPTNDEICEAFRKDPKEYANQFMWEYSTNYGQAPLSLLVSYTK  |
| Chimpanzee          | LCMAALKHQEQEFPTYVEPTNDEICEAFRKDPKEYANQFMWEYSTNYGQAPLSLLVSYTK  |
| Bonobo              | LCMAALKHQEQEFPTYVEPTNDEICEAFRKDPKEYANQFMWEYSTNYGQAPLSLLVSYTK  |
| Gorilla             | LCMAALKHQEQEFPTYVEPTNDEICEAFRKDPKEYANQFMWEYSTNYGQAPLSLLVSYTK  |
| Orangutan           | LCMAALKHQEQEFPTYVEPTNDEICEAFRKDPKEYANQFMWEYSTNYGQAPLSLLVSYTK  |
| Gibbon              | LCMAALKHQEQEFPTYVEPTNDEICEAFRKDPKEYANQFMWEYSTNYGQAPLSLLVSYTK  |
| Rhesus              | LCMAALKHQEQEFPTYVEPTNDEICEAFRKDPKEYANQFMWEYSTNYGQAPLSLLVSYTK  |
| Crab-eating macaque | LCMAALKHQEQEFPTYVEPTNDEICEAFRKDPKEYANQFMWEYSTNYGQAPLSLLVSYTK  |
| Olive baboon        | LCMAALKHQEQEFPTYVEPTNDEICEAFRKDPKEYANQFMWEYSTNYGQAPLSLLVSYTK  |
| Marmoset            | LCMAALKHPPPEEFPSYVEPTNDEICEAFRKDPKEYANQFMWEYSTNYGQAPLSLLVSYTK |
| Squirrel monkey     | LCMAALKHPPPEEFPSYVEPTNDEICEAFRKDPKEYANQFMWEYSTNYGQAPLSLLVSYTK |
| Tarsier             | LCMVALKHRPQEFPTYVEPTNDEICEAFRKDPKEYANQFMWEYSTNYGQAPLSLLVSYTK  |
| Mouse lemur         | LCM-ALKHPPQEFPTYVEPTNDEICEAFRKDPKEYANQFMWEYSTNYGQAPLSLLVSYTK  |
| Bushbaby            | LCMAALKHQEQEFPTYVEPTNDEICEAFRKDPKEYANQFMWEYSTNYGQAPLSLLVSYTK  |
| Chinese tree shrew  | LCMAALKHQEQEFPTYVEPTNDEICEAFRKDPKEYANQFMWEYSTNYGQAPLSLLVSYTK  |
| Squirrel            | LCMAALKHQEQEFPTYVEPTNDEICEAFRKDPKEYANQFMWEYSTNYGQAPLSLLVSYTK  |
| Ground squirrel     | LCMAALKHQEQEFPTYVEPTNDEICEAFRKDPKEYANQFMWEYSTNYGQAPLSLLVSYTK  |
| Golden hamster      | LCMAALKHQEQEFPTYVEPTNDEICEAFRKDPKEYANQFMWEYSTNYGQAPLSLLVSYTK  |
| Kangaroo rat        | LCMAALSHQEQEFPTYVEPTNDEICEAFRKDPKEYANQFMWEYSTNYGQAPLSLLVSYTK  |
| Mouse               | LCMAALSHQEQEFPTYVEPTNDEICEAFRKDPKEYANQFMWEYSTNYGQAPLSLLVSYTK  |
| Rat                 | LCMAALSHQEQEFPTYVEPTNDEICEAFRKDPKEYANQFMWEYSTNYGQAPLSLLVSYTK  |
| Naked mole rat      | LCMAALSHQEQEFPTYVEPTNDEICEAFRKDPKEYANQFMWEYSTNYGQAPLSLLVSYTK  |
| Guinea pig          | LCMAALSHQEQEFPTYVEPTNDEICEAFRKDPKEYANQFMWEYSTNYGQAPLSLLVSYTK  |
| Rabbit              | LCMAALKHPPPEEFPSYVEPTNDEICEAFRKDPKEYANQFMWEYSTNYGQAPLSLLVSYTK |
| Pika                | LCMAALKHPPPEEFPSYVEPTNDEICEAFRKDPKEYANQFMWEYSTNYGQAPLSLLVSYTK |
| Pig                 | LCMAALKHQEQEFPTYVEPTNDEICEAFRKDPKEYANQFMWEYSTNYGQAPLSLLVSYTK  |
| Alpaca              | LCMAALKHQEQEFPTYVEPTNDEICEAFRKDPKEYANQFMWEYSTNYGQAPLSLLVSYTK  |
| Bactrian camel      | LCMAALKHQEQEFPTYVEPTNDEICEAFRKDPKEYANQFMWEYSTNYGQAPLSLLVSYTK  |
| Dolphin             | LCMAALKHQEQEFPTYVEPTNDEICEAFRKDPKEYANQFMWEYSTNYGQAPLSLLVSYTK  |
| Killer whale        | LCMAALKHQEQEFPTYVEPTNDEICEAFRKDPKEYANQFMWEYSTNYGQAPLSLLVSYTK  |
| Cow                 | LCMAALRHQEQEFPTYVEPTNDEICEAFRKDPKEYANQFMWEYSTNYGQAPLSLLVSYTK  |
| Sheep               | LCMAALRHQEQEFPTYVEPTNDEICEAFRKDPKEYANQFMWEYSTNYGQAPLSLLVSYTK  |
| Goat                | LCMAALRHQEQEFPTYVEPTNDEICEAFRKDPKEYANQFMWEYSTNYGQAPLSLLVSYTK  |
| Horse               | LCMAALRHQEQEFPTYVEPTNDEICEAFRKDPKEYANQFMWEYSTNYGQAPLSLLVSYTK  |
| White rhinoceros    | LCMAALRHQEQEFPTYVEPTNDEICEAFRKDPKEYANQFMWEYSTNYGQAPLSLLVSYTK  |
| Cat                 | LCMAALRHQEQEFPTYVEPTNDEICEAFRKDPKEYANQFMWEYSTNYGQAPLSLLVSYTK  |
| Dog                 | LCMAALRHQEQEFPTYVEPTNDEICEAFRKDPKEYANQFMWEYSTNYGQAPLSLLVSYTK  |
| Ferret              | LCMAALRHQEQEFPTYVEPTNDEICEAFRKDPKEYANQFMWEYSTNYGQAPLSLLVSYTK  |
| Panda               | LCMAALRHQEQEFPTYVEPTNDEICEAFRKDPKEYANQFMWEYSTNYGQAPLSLLVSYTK  |
| Pacific walrus      | LCMAALRHQEQEFPTYVEPTNDEICEAFRKDPKEYANQFMWEYSTNYGQAPLSLLVSYTK  |
| Weddell seal        | LCMAALRHQEQEFPTYVEPTNDEICEAFRKDPKEYANQFMWEYSTNYGQAPLSLLVSYTK  |
| Megabat             | LCMASLKHQEQEFPTYVEPTNDEICEAFRKDPKEYANQFMWEYSTNYGQAPLSLLVSYTK  |
| David's myotis      | LCMAALRHQEQEFPTYVEPTNDEICEAFRKDPKEYANQFMWEYSTNYGQAPLSLLVSYTK  |
| Microbat            | LCMAALRHQEQEFPTYVEPTNDEICEAFRKDPKEYANQFMWEYSTNYGQAPLSLLVSYTK  |
| Hedgehog            | LCMAALRHQEQEFPTYVEPTNDEICEAFRKDPKEYANQFMWEYSTNYGQAPLSLLVSYTK  |
| Shrew               | LCMAALRHQEQEFPTYVEPTNDEICEAFRKDPKEYANQFMWEYSTNYGQAPLSLLVSYTK  |
| Star nosed mole     | LCMAALRHQEQEFPTYVEPTNDEICEAFRKDPKEYANQFMWEYSTNYGQAPLSLLVSYTK  |
| Elephant            | LCMAALRHQEQEFPTYVEPTNDEICEAFRKDPKEYANQFMWEYSTNYGQAPLSLLVSYTK  |
| Hyrax               | LCMAALRHQEQEFPTYVEPTNDEICEAFRKDPKEYANQFMWEYSTNYGQAPLSLLVSYTK  |
| Cape golden mole    | LCMAALRHQEQEFPTYVEPTNDEICEAFRKDPKEYANQFMWEYSTNYGQAPLSLLVSYTK  |
| Tenrec              | LCMAALRHQEQEFPTYVEPTNDEICEAFRKDPKEYANQFMWEYSTNYGQAPLSLLVSYTK  |
| Armadillo           | LCMAALRHQEQEFPTYVEPTNDEICEAFRKDPKEYANQFMWEYSTNYGQAPLSLLVSYTK  |
| Sloth               | LCMAALRHQEQEFPTYVEPTNDEICEAFRKDPKEYANQFMWEYSTNYGQAPLSLLVSYTK  |
| Tasmanian devil     | LCMAALRHQEQEFPTYVEPTNDEICEAFRKDPKEYANQFMWEYSTNYGQAPLSLLVSYTK  |



Platypus LCMAALMQPPQEFPTYVEPSNDETCEAFKKDPKGFQFLYEYSSNYGQAPLRLLLGYTK

Human SYLSMVGSCCTSASPTVCFLKERLQKHLSSLTTLNVRVCSQYAAAYGEKKSRLSNLIKLA  
Chimpanzee SYLSMVGSCCTSASPTVCFLKERLQKHLSSLTTLNVRVCSQYAAAYGEKKSRLSNLIKLA  
Bonobo SYLSMVGSCCTSASPTVCFLKERLQKHLSSLTTLNVRVCSQYAAAYGEKKSRLSNLIKLA  
Gorilla SYLSMVGSCCTSASPTVCFLKERLQKHLSSLTTLNVRVCSQYAAAYGEKKSRLSNLIKLA  
Orangutan SYLSMVGSCCTSASPTVCFLKERLQKHLSSLTTLNVRVCSQYAAAYGEKKSRLSNLIKLA  
Gibbon SYLSMVGSCCTSASPTVCFLKERLQKHLSSLTTLNVRVCSQYAAAYGEKKSRLSNLIKLA  
Rhesus NYLSMVGSCCTSESPTVCFLKERLQKHLSSLTTLNVRVCSQYAAAYGEKKSRLSNLIKLA  
Crab-eating macaque NYLSMVGSCCTSESPTVCFLKERLQKHLSSLTTLNVRVCSQYAAAYGEKKSRLSNLIKLA  
Olive baboon NYLSMVGSCCTSENPTVCFLKERLQKHLSSLTTLNVRVCSQYAAAYGEKKSRLSNLIKLA  
Marmoset SYLSMVGSCCTISANPTVCFLNERLQIKHLSLLTTLNVRVCSQYAAAYGEKKSRLSNLIKLA  
Squirrel monkey SYLSMVGSCCTISANPTACFLNERLQIKHLSLLTTLNVRVCSQYAAAYGEKKSRLSNLIKLS  
Tarsier SYLSMVGSCCTSTSPVCFLKERLQMKHLSLLTTLNVRVCSQYVAYGEKKSRLSOLIKLA  
Mouse lemur SYLSMVGSCCTSASPTVCFLKERLQSKHLSLLTTLNVRVCSQYAAAYGEKKSRLSHLIKLA  
Bushbaby SYLSMVGSCCTSPSPTVCFLKERLQMKPVSLLTTLNVRVCSQYAAAYGEKKSRRSHLIKLA  
Chinese tree shrew SYLSMVGSCCTSASPTVCFLKERLQSKQLSLLTTLNVRVCSQYAAAYGEKKSRLSHLIKLA  
Squirrel SYLSMVGTCCTTSASPTVCFLKERLHMRQFSLLTTLNVRVCSQYAAAYGEKKSRLSHLIKLA  
Ground squirrel SYLSMVGTCCTTSASPTVCFLKERLHMRQFSLLTTLNVRVCSQYAAAYGEKKSRLSHLIKLA  
Golden hamster SYLSMVGSCCTSASPTVCFLKERLQIKHLSLLTTLNVRVCSQYAAAYGEKKSRLSYLIKLA  
Kangaroo rat SYLSMVGSCCTSANPTVCFLKERLQIKHLSLLTTLNVRVCSQYAVYGEKLRSLSHLIKLA  
Mouse NYLSMVGSCCTSANPTVCFLKERLQMKHLSLLTTLNVRVCSQYAAAYGEKKSRLSHLIKLA  
Rat SYLSMVGSCCTSAKPTVCFLKERLQMKQLSLLTTLNVRVCSQYAAAYGEKKSRLSHLIKLA  
Naked mole rat IYLSMVGSCCTSPSPNVCFLKERLQIRHLSLLTTLNVRVCSQYAAAYGEKKSRLSHLIKLA  
Guinea pig SYLSMVGSCCTSPNPTVCFLKERLQIRHLSLLTTLNVRVCSQYAVNGEKSQISHLIKLA  
Rabbit SYLSMVGTCCTTSASPTVCFLKERLQIKHLSLLTTLNVRVCSQYAAAYGEKKSRRSHLIKLA  
Pika SYLSMVGTCCTSPNPTVCFLKERLQIKHLSLLTTLNVRVCSQYAVYGEKKSRRSHLIKLA  
Pig SYLSMVGSCCTSPSPTVCFLKERLQKHLSSLTTLNVRVCSQYAAAYGKDKSRLSHLIKLA  
Alpaca SYLSMVGSCCTSPSPTVCFLRERLQKHLSSLTTLNVRVCSQYAAAYGEKKSRLSHLIKFA  
Bactrian camel SYLSMVGSCCTSPSPTVCFLRERLQKHLSSLTTLNVRVCSQYAAAYGEKKSRLSHLIKFA  
Dolphin SYLSMVGSCCTSPNPTVCFLKERLQKHLSSLTTLNVRVCSQYAAAYGEKKSRLSHLIKFA  
Killer whale SYLSMVGSCCTSPNPTVCFLKERLQKHLSSLTTLNVRVCSQYAAAYGEKKSRLSHLIKFA  
Cow SYLSMVGSCCTSPNPTVCFLKERLQKHLSSLTTLNVRVCSQYAAAYGEKKSRLSHLIKFA  
Sheep SYLSMVGSCCTSPNPTACFLKERLQKHLSSLTTLNVRVCSQYAAAYGEKKSRLSHLIKFA  
Goat SYLSMVGSCCTSPNPTACFLKERLQKHLSSLTTLNVRVCSQYAAAYGEKKSRLSHLIKFA  
Horse SYLSMVGSCCTSPSPTVCFLKERLQKHLSSLTTLNVRVCSQYAAAYGEKKSRLSHLIKLA  
White rhinoceros SYLSMVGSCCTSPSPTACFLKERLQKHLSSLTTLNVRVCSQYAAAYGEKKSRLSHLIKLA  
Cat SYLSMVGSCCTSPSPTVCFLKERLQMKHLSLLTTLNVRVCSQYAAAYGEKKSRLSHLVKLA  
Dog SYLSMVGSCCTSSSPTACFLKERLQMKHLSLLTTLNVRVCSQYAAAYGEKKSRLSHLIKLA  
Ferret SYLSMVGSCCTSPHPTVCFLKERLQMKHLSLLTTLNVRVCSQYAAAYGEKKSRLSHLIKLA  
Panda SYLSMVGSCCTSPSPTVCFLKERLQMKHLSLLTTLNVRVCSQYAAAYGEKKSRLSHLIKLA  
Pacific walrus SYLSMVGSCCTSPIPTVCFLKERLQMKHLSLLTTLNVRVCSQYAAAYGEKKSRLSHLIKLA  
Weddell seal SYLSMVGSCCTSPSPTVCFLKERLQMKHLSLLTTLNVRVCSQYAAAYGEKKSRLSHLIKLA  
Megabat SYLSMVGSCCTSSSPTVCFLKERLQIKHLSLLTTLNVRVCSQYAAAYRKEKSRLSHLIKLA  
David's myotis SYLSMVGSCCTSSSPTVCFLKERLQIKHLSLLTTLNVRVCSQYAAAYEKEKSRLSHLIKLA  
Microbat SYLSMVGSCCTSSSPTVCFLKERLQIKHLSLLTTLNVRVCSQYAAAYEKEKSRLSHLIKLA  
Hedgehog SYLSMVGSCCTSPNPTICFLKERLQIKHLSLLTTLNVRVCSQYVAYGEKKSRLSHLIKFA  
Shrew TYLSMVGSCCTSSSPTVCFLKERLQMKHLSLLTTLNVRVCSQYVAYGEKKSRLSLFIKLA  
Star nosed mole SYLSMVGSCCTSPNPTVCFLKERLQIKHLSLLTTLNVRVCSQYVAYGEKKSRLSHLIKLA  
Elephant SYLSMVGSCCTSSSPTVCFLKERLQIKHLSLLTTLNVRVCSQYVAYGEKKSRLSHLIKLA  
Hyrax SYLSMVGSCCTSSNPTVCFLKERLQIKHLSLLTTLNVRVCSQYVAYGEKKSRLSHLIKLA  
Cape golden mole SYLSMVGSCCTSSRPIECFLKERLQIKHLSLLTTLNVRVCSQYVAYGKDKSRLSHLIKLA  
Tenrec SYLSMVGSCCTSSSTVCFLKERLQIKHLSLLTTLNVRVCSQYVAYGKDKSRLSHLIKLA  
Armadillo SYLSMVASCTSRSTICFLKERLQMKYLSLLTTLNVRVCSQYAAAYGKERSRLSHLIKLA  
Sloth SYLSMVASCTSSSNVV---ERLQIKHLSLLTTLNVRVCSQYTVYGEKKSRLSHLIKLA  
Tasmanian devil NYLSMVGTCCTSANPTACFLAERLQNKHLSLLTTLNVRVCSQYVAYGKDKSRLSHLIKLA  
Platypus SYLSMVGTCCTSPKNTCFLHEKLSQKQISVLTTLNVRVCSQYVAYGKDKSRLSHLIKLA

Human QKVPTADLEDVPLAEDITNILSKCCESASEDCMAKELPEHTVKLCDNLSTKNSKFEDCC  
Chimpanzee QKVPTADLEDVPLAEDITNILSKCCESASEDCMAKELPEHTVKLCDNLSTKNSKFQDCC  
Bonobo QKVPTADLEDVPLAEDITNILSKCCESASEDCMAKELPEHTVKLCDNLSTKNSKFQDCC  
Gorilla QKVPTADLEDVPLAEDITNILSKCCESASEDCMAKELPEHTVKLCDNLSTKNSKFEDCC  
Orangutan QKVPTADLEDVPLAEDITNILSKCCESASEDCMAKELPEHTVKLCDNLSTKNSKFEDCC

|                     |                                                             |
|---------------------|-------------------------------------------------------------|
| Gibbon              | QKVPTADLEDVPLAEDITNLSKCCESSEDMAKELPEHTVKLCDNLSTKNSKFEDCC    |
| Rhesus              | QKVPTADLEHVLPLAEDVTNLSKCCESASEDCMAKELPEHTVKLCDNLSSKNSKFEECC |
| Crab-eating macaque | QKVPTADLEHVLPLAEDVTNLSKCCESASEDCMAKELPEHTVKLCDNLSSKNSKFEECC |
| Olive baboon        | QKVPTADLEHVLPLAEDVTNLSKCCESASEDCMAKELPEHTVKLCDNLSSKNSKFEECC |
| Marmoset            | QKVPTADLEDVPLVAEDITNLSKCCESSTDDCMAKELPLHTVKICEHLSTKNSKFEDCC |
| Squirrel monkey     | QKVPTADLEDVPLVAEDITNLSKCCESISDDCMAKELPLHTVKICEHLSTKNSKFEDCC |
| Tarsier             | QKVPTADLEDVPLAEDLTNLSKCCESSEDMAKELPEYTVKICDNLSTKNSKFEDCC    |
| Mouse lemur         | QKVPAVDLEDILPLAEDVTNLSKCCQSTSEDMAKELPEYTIKICDNLSTKNSKFGDCC  |
| Bushbaby            | QKVPTADLEDVPLAEDVTNLTCCPSTSEDMAKELPEHTVKVCEHLSTKSSKFGDCC    |
| Chinese tree shrew  | QKVPTAELEDVPLAEDINKILSKCCESTAEDCMAKELPEHTVKICDNLSTKNSKFEDCC |
| Squirrel            | QKVPTADLEAVLPLAEDITRILSKCCESSEDMAKELPEHTVKICDNLSTKNSKFEDCC  |
| Ground squirrel     | QKVPTADLEAVLPLAEDITRILSKCCESSEDMAKELPEHTVKICDNLSTKNSKFEDCC  |
| Golden hamster      | QKVPTANLEDVPLAEDLTQILSRCCESSEDMAKELPEHTLKICDNLSTKNSKFEECC   |
| Kangaroo rat        | QKAPAAELDHVLPLAEDATNILARCCESSEDMAKELPEYTVKICDNLSSVSAKIKDCC  |
| Mouse               | QKVPTANLENVPLAEDFTEILSRCCESSEDMAKELPEHTIKICQNLSSKNSKFEECC   |
| Rat                 | QKVPTANLEDVPLAEDLTEILSRCCSTSEDMAKELPEHTLKICGNLSSKNSKFEECC   |
| Naked mole rat      | QKVPTADLKDVPLVAEDMTAILSKCCESSEDMAKELPEYTVRVCNLSKNSKFEFNC    |
| Guinea pig          | QKAPTADLKDVLSLAEDITLILSKCCESSEDMAKELPEYTVRVCNLSKNSKFEFNC    |
| Rabbit              | QKAPTAALKEVPLAEDITNLSKCCESSEDMAKELPEHTVKICDSLSTKNPKFEFNC    |
| Pika                | QKVPTADLK-----LPEHTVKICDSLSTKNPKFEFNC                       |
| Pig                 | QKVPTANLEDVPLAEDVATILSKCCDSASEDCMAKELPEYTVKICDNLSSKNSKFTDCC |
| Alpaca              | QKVPTADLKDVPLAEDVTTILSKCCGSASEDCMAKELPEYTVKICDSLSTKNPKFKDCC |
| Bactrian camel      | QKVPTADLEDVPLAEDVTTILSKCCGSASEDCMAKELPEYTVKICDSLSTKNPKFKDCC |
| Dolphin             | QKVPTANLEDVPLAEGVTTILSKCCESASEDCMAKELPEYTVKICDNLSTKNSKFKDCC |
| Killer whale        | QKVPTANLEDVPLAEGVTTILSKCCESASEDCMAKELPEYTVKICDNLSTKNSKFKDCC |
| Cow                 | QKVPTAHLEDVPLAEDITLILSKCCDSVSEDCI-KELPEYAVKLCDNLSTKNSKFKDCC |
| Sheep               | QKVPTAHLEDVPLAEDITLILSKCCESASEDCMPKELPEYTVKLCDNLSTKNSKFKDCC |
| Goat                | QKVPTAHLEDVPLAEDITLILSKCCESASEDCMPKELPEYTVKLCDNLSTKNSKFKDCC |
| Horse               | QKVPTADLEDVPLAEDITLILSKCCESSEDMAKELPEYSLKICDKLSTKNSKFKHDCC  |
| White rhinoceros    | QKVPTADLEDVPLAEDITLILSTCCSTSEDMAKELPEYSLKICDKLSTKNSKFKHDCC  |
| Cat                 | QKVPTADLEDVPLAEEITLILSKCCESSEDMAKELPEYTVKICDNLATKNSKFKDCC   |
| Dog                 | QKVPTAELEDVPLAEEINTVLSKCCESSEDMAKELPEYTVKICDNLSTKNSKFKDCC   |
| Ferret              | QKVPTAELEDVPLAEEINTVLSKCCESSEDMAKELPEYTVKICDNLSTKDSKFKDCC   |
| Panda               | QKVPTAELEDVPLAEEINTLILSKCCESSEDMAKELPEYTVKICDNLSTKNSKFKDCC  |
| Pacific walrus      | QKVPTANLEDVPLAEEINTLILSKCCESSEDMAKELPEYTVKICDNLSTKNSKFKDCC  |
| Weddell seal        | QKVPTANLEDVPLAEEINTLILSKCCESSEDMAKELPEYTVKICDNLSTKNSKFKDCC  |
| Megabat             | QKVPTADLEDVPLAEDVTTILSKCCESSEDMAKELPEHTIKICDNLSTKNSKFNDC    |
| David's myotis      | QKAPTANLEDVPLAEDVTTILSKCCGSTSEDMAKELPEHTVKICDNLSTKNDKFRDCC  |
| Microbat            | QKAPTANLEDVPLAEDVTTILSKCCGSTSEDMAKELPEHTVKICDNLSTKNDKFRDCC  |
| Hedgehog            | QKVPTADLKEVPLAEGITLILSKCCESSEDMAKELPEHTVKICNSLSSKNSKFKDCC   |
| Shrew               | QKVPTADLKDVPLAEDITRILSKCCESSEDMAKELPEHTVKLCDNLSSKNSKFKDCC   |
| Star nosed mole     | QKVPTADLKDVPLAEDATAILSKCCESTTEGCMKELPEHTVKICDNLSTKDSKFKDCC  |
| Elephant            | QKAPTADMGDVPLAEDVTNLSKCCESSEDMAKELPEHTVKICDNLSTKNSKFKDCC    |
| Hyrax               | QKAPSADLGDVPLAEDITNLSKCCESSEDMAKQLPEHTVKICDNLSTKNSKFEDCC    |
| Cape golden mole    | QKAPTADLEDVPLAEDVTNLSKCCESASEDCMAKELPEHTVKICDNLSTKNSKFEDCC  |
| Tenrec              | QKAPTAALQDVPLAEDLTNLSKCCESPSEDMAKELPEHTVKICDKLSTKNSKFEDCC   |
| Armadillo           | QKAPTADLEDVLLAEDITEILSKCCDSPSEDCLPKEVGESTIIITHLLRRHSS----   |
| Sloth               | QKVPTADLEDILPLVEDISEILSKCCGSSEDCMAKELPEHTVKICDNLATKNSKFEDCC |
| Tasmanian devil     | QKVPTAALEDVVELAEDMTNVLSDCCNSILEDMANELADHTVKVCEKLSKDKRFEHCC  |
| Platypus            | QKVPSADFKDAEFLSEDSIRMLSKCCSDAEDCMA--LLPEHVEKVCDRLSTKDSQIQSC |

|                     |                                                              |
|---------------------|--------------------------------------------------------------|
| Human               | QEKAMDFVFCYFMPAAQLPELDPVELPTNKDVCDPGNTKVMKDYTFELSRRTHLPEVF   |
| Chimpanzee          | QEKAMDFVFCYFMPAAQLPELDPVELPTNKDVCDPGNTKVMKDYTFELSRRTHLPEVF   |
| Bonobo              | QEKAMDFVFCYFMPAAQLPELDPVELPTNKDVCDPGNTKVMKDYTFELSRRTHLPEVF   |
| Gorilla             | QEKAMDFVFCYFMPAAQLPELDPVELPTNKDVCDPGNTKVMKDYTFELSRRTHLPEVF   |
| Orangutan           | QEKAMDFVFCYFMPAAQLPELDPVELPTNKDVCDPGNTKVMKDYTFELSRRTHLPEVF   |
| Gibbon              | QEKAMDFVFCYFMPAAQLPELDPVELPTNKDVCDPGNTKVMKDYAFELSRRTHLPEVF   |
| Rhesus              | QEKAMDIFVFCYFMPAAQPPELPEVELPTNKDVCDQGNTKVMKDYTFELSRRTHLPEVF  |
| Crab-eating macaque | QEKAMDIFVFCYFMPAAQPPELPEVELPTNKDVCDQGNTKVMKDYTFELSRRTHLPEVF  |
| Olive baboon        | QEKAMDIFVFCYFMPAAQPPELPEVELPTNKDVCDQGNTKVMKDYTFELSRRTHLPEVF  |
| Marmoset            | QEKTPMDVFCYFMPAAQPELDPVELPTNKDVCDSGNTKALDKYTFELSRRTHLPEVF    |
| Squirrel monkey     | QEKTPMDVFCYFMPAAQPELDPVELPTNKDVCDSGNTKALDKYTFELSRRTHLPEVF    |
| Tarsier             | QEKTPMDIFVFCYFMPAAQPPELDPVELPTNKDVCEQGNTKARDQYAFELSRRTHLPEVF |
| Mouse lemur         | QEKTPMDIFMCTYFMPAAQPPELDPVKLPTSKDVCNPGSTKAMDQYTFELSRRTQVPEVF |
| Bushbaby            | QEKTPMDVFMCTYFMPAAQPPELDPVKLPTGRDVCDHGNTKAVDQYTFELSRRTHVPEVF |

|                    |                                                                 |
|--------------------|-----------------------------------------------------------------|
| Chinese tree shrew | REKTPMDIFVCTYFMPAAQPPELPIEMPTNKDVCQGHARVLDQYTFQLSRRTHVPEVF      |
| Squirrel           | QEKTPMDIFMCTYFMPAAQPPQLPDVQFPTNKDVCDANKTKAMDQYAFELSRRTHIPEVF    |
| Ground squirrel    | QEKTPMDIFMCTYFMPAAQPPQLPDVQFPTNKDVCDANKTKAMDQYAFELSRRTHIPEVF    |
| Golden hamster     | QEKTPMDIFMCTYFMPAAEPLQPLVIKLPTETDLGQSTTQAMDRYTFELSRTRVPEVF      |
| Kangaroo rat       | QEKTPMDIFVCTYFMPALQPAQLLPVKLPVTQDLNQQNTKAVARYTFELNKRNTNIPEVF    |
| Mouse              | QENTPMNIFMCTYFMPAAEPLQPLPAIKLPTGKDLGQSTTQAMDQYTFELSRRTQVPEVF    |
| Rat                | YETTPMGIFMCSYFMPATAEPLQPLPAIKLPTSKDLGQSATQAMDQYTFELSRRTQVPEVF   |
| Naked mole rat     | QEEAPLGIFTCIYFMPAALPLELPAIELPTSTEICDQRNTKALDQYTFELTRRTPIPEVF    |
| Guinea pig         | REETPLGIFTCVYFMPAAPQVKLQAVELPTNTEVCGQKSTKALDQYTFELSRRTPIPEVF    |
| Rabbit             | QEKTPMDIFVCTYFMPAAQPPEPANVELPTS KDVCDSKNINVMQYTFELSRKTHIPEVF    |
| Pika               | NEKTPMGIFVCTYFMPAAQPPELPAVKLPTS KDVCDSSTNTNVMQYTFELGRRTQIPEVF   |
| Pig                | QEKTPMDIFICTYFMPAARPELDPVKLPTNKDVCDKGNPKVLDQYIFELSRKTHIPEVF     |
| Alpaca             | QEKTPMDIFVCTYFMPAAPTPELDPVKLPTNKDVCDKENTEVLDQYAFELSRKTHIPEVF    |
| Bactrian camel     | QEKTPMDIFVCTYFMPAAPTPELDPVKLPTNKDVCDKENTKVLQYAFELSRKTHIPEVF     |
| Dolphin            | QERTPMDIFVCTYFMPAANPDLDPVKLPTNKDVCDKGNTKVLDQYAFDLSRKTHIPEVF     |
| Killer whale       | QERTPMDIFVCTYFMPAAQNPDLDPVKLPTNKDVCDKGNTKVLDQYTFDLSRKTHIPEVF    |
| Cow                | QEKTPMEIFVCA YFMPASPNEP LDPVKLPMNKDVCDGENTKVLQYIFELSRKTRIPEVF   |
| Sheep              | QEKTPMDIFVCA YFMPASP NKLPD VQLPTNKDVCDKGN TNVLDQYIFELSRKTQIPEVF |
| Goat               | QEKTPMDIFVCA YFMPASP NKLPD VQLPTNKDVCDKGN TNVLDQYIFELSRKTQIPEVF |
| Horse              | QEKTPMDVFCY YFMPAAQSP ELPDVELPTNKDVCDKGN TKPIDQYIFELSRTHIPEVF   |
| White rhinoceros   | QEKTPMGIFVCTYFMPAAQPLELDPVELPTNKEVCSKGN TKALDQYTFELSGRTHIPEVF   |
| Cat                | QEKTPMDVFMCA YFMPAAPTPELPAVELPTGQDLCDKGN TKAIQYIFELSRRTPLPEVF   |
| Dog                | QEKTPMDIFVCA YFMPAAPTPELPAIELPANADVCDKGN TKAIQYIFELSRRTHLPEVF   |
| Ferret             | LEKTPMDVFCY YFMPAAPTPELPAIELPTNSDVCDKGN TKAIQYIFELSRRTHLPEVF    |
| Panda              | QEKTPMDVFCY YFMPAAPTPELPAVELPTSTDVCDKGN TKAIQYIFELSRRTHLPEVF    |
| Pacific walrus     | QEKTPMDVFCY YFMPAAPTPELPAIEWPTNTDVCDKGN AKAIQYIFELSRRTHLPEVF    |
| Weddell seal       | QEKTPMDVFCY YFMPAAPTPELPAIEWPTNTDVCDKGN AKAIQYIFELSRRTHLPEVF    |
| Megabat            | QEKTPMDIFMCI YFTPAAQPELPEVEMPTNKDMCGN TRAMDKYAFELSRRTHIPEVF     |
| David's myotis     | QERTPMDIFMCI YFTPATQPELPEVALPTS KDVC GGN TKAMDRTYTFELSRRTDVEVF  |
| Microbat           | QERTPMDIFMCI YFTPATQPELPEVELPTS KDVC GGN TKAMDRTYTFELSRRTDVEVF  |
| Hedgehog           | QEKTPMDVFCY YFMPAAPTPELPAIEWPTNTDVCDKGN AKAIQYIFELSRRTHLPEVF    |
| Shrew              | QEKTPMDVFCY YFMPAAPTPELPAIEWPTNTDVCDKGN AKAIQYIFELSRRTHLPEVF    |
| Star nosed mole    | QEKTPMDVFCY YFMPAAPTPELPAIEWPTNTDVCDKGN AKAIQYIFELSRRTHLPEVF    |
| Elephant           | QEKTPMDIFVCTY FMPAAQPPELPAVELPTNKEVCDKESTKATDQYIFELSRRTHIPEVF   |
| Hyrax              | EKTPMDVFCY YFMPAAQPLELPAELPTNKDVCDKENT EATDQYIFELSRRTHIPEVF     |
| Cape golden mole   | QEKTPMDIFVCTY FMPAAQPLKQAVELPTEKDMCNKGN TKAKDQYIFELSRRTHIPEVF   |
| Tenrec             | QEKTPMDIFVCA YFMPAAQPPELPAVDLPTNKAVCSRENTKAKEQYAFELSRRTQIPEVF   |
| Armadillo          | ----QLLFTCIVF--SINPHKYPNEILFIYLQLKESHYFFSYGRYAFQLSRSSH IPEVF    |
| Sloth              | QEKTPMDVFCY YFMPAAQPPELPAVELPTNKD ICDKGN TKATDQYTFQLSRRTHIPEVF  |
| Tasmanian devil    | GESSPMDIFLCI YSMPAAQALKLSEFIKPSHEE ICSTENNKALDRYMYEQSRRKN IPEVF |
| Platypus           | QENTPMDIVLCLYSKPPAKSPKPADLPRPTNEDMCSTENPKALDRYIFEIGRRYHVPEVF    |

|                     |                                                                  |
|---------------------|------------------------------------------------------------------|
| Human               | LSKVLEPTLKSLGECDDVEDSTTCFNAKGPLLKKE LSSFIDKGQELCADYSENTFTTEYKK   |
| Chimpanzee          | LSKVLEPTLKSLGECDDVEDSTTCFNAKGPLLKKE LSSFIDKGQELCADYSENTFTTEYKK   |
| Bonobo              | LSKVLEPTLKSLGECDDVEDSTTCFNAKGPLLKKE LSSFIDKGQELCADYSENTFTTEYKK   |
| Gorilla             | LSKVLEPTLKSLGECDDVEDSTTCFNAKGPLLKKE LSSFIDKGQELCADYSENTFTTEYKK   |
| Orangutan           | LSKVLEPTLKSLGECDDVEDSTTCFNAKGPLLKKE LSSFIDKGQELCADYSENTFTTEYKK   |
| Gibbon              | LSKVLEPTLKSLGECDDVEDSTTCFNAKGPLLKKE LSSFIDKGQELCADYSENTFTTEYKK   |
| Rhesus              | LKVLEPTLKSLGECDDVEDSTTCFNTKGPLLKQELSS FIDKGQKLCAGYSENTFTTEYKK    |
| Crab-eating macaque | LKVLEPTLKSLGECDDVEDSTTCFNTKGPLLKQELSS FIDKGQKLCAGYSENTFTTEYKK    |
| Olive baboon        | LKVLEPTLKSLGECDDVEDSTTCFNTKGPLLKQELSS FIDKGQKLCAGYSENTFTTEYKK    |
| Marmoset            | LSKVLDPTLKRLGECDDVEDSTACFNKGP LKKE LASFIDKGQELCADYSENTFTTEYKK    |
| Squirrel monkey     | LSKVLDPTLKRLGECDDAKDSTACFNKGP LKKE LASFIDKGQELCADYSENTFTTEYKK    |
| Tarsier             | LSKVLEPTLKSLGECCTVEDSATCFNAKGPLLKKE LSSFINKGQELCEDYSENTFTTEYKK   |
| Mouse lemur         | LSKILEPTLKSLGECDDLKDP TACLKAKSPLLTKELSS FISKGQELCADYSENTFTTEYKK  |
| Bushbaby            | LSKVLEPTLKSLGECDDLEDPATCLTAKGPQLEKELSS FIAKGQELCADYSENTFTTEYKK   |
| Chinese tree shrew  | LSKILEPTLKSLGECVSEDSTACFNAKGPLLKKE LSSFVHKGQELCADYSENTFTTEYKK    |
| Squirrel            | LSKILTLTLKTLSECCDSQNPASCFVTKGSLMKRQSLFLDKGQELCADYSENTFTTEYKK     |
| Ground squirrel     | LSKILTLTLKTLSECCDSQNPASCFVTKGSLMKRQSLFLDKGQELCADYSENTFTTEYKK     |
| Golden hamster      | LSKVLETTLKSLSSECCDAQDSMACFSTQSPILKKQLTSFIERGQEMCADYSENTFTTEYKK   |
| Kangaroo rat        | LSKILEPTLKSLSSECCDLQDPSTCFNDKNPQLTVV LNSFLGKVHVELCADYSENTFTTEYKK |
| Mouse               | LSKVLEPTLKTLECCDTQDSVACFSTQSP LKRLQTSFIEKGQEMCADYSENTFTTEYKK     |
| Rat                 | LSKVLDTTLKTLECCDTQDSVACFSTQSP LKRLQTSFIEKGQEMCADYSENTFTTEYKK     |
| Naked mole rat      | LSKIVETTLRSLNECCDWEDSAACFTDKGSQLK KKLSSFIEKGQEV CADYSENTFTDYKK   |
| Guinea pig          | LSKILEPTLKSLSNECCDSEDSACFTDKGSQLK KKLSSFIEKGQELCADYSENTFTTEYKK   |

Rabbit LSKVLEPTLKSLSDECCHSADSTACLNAKGPVLKKEVSSFIDKGQELCAGYSENTFFTEYKK  
Pika LSKVLEPTLKSLSDECCHSADSTACLNAKGPVLLKELSSFIDKGQELCKDYSENTFFTEYKK  
Pig LSKILEPTLKSLSDECCHSSEDSTACFKAKGPQFKKELSSFIEKGQELCADYSENTFFTEYKK  
Alpaca LSKILEPTLRGLAECCNSGESTACLNEKGPQLKELSSFIEKGQELCADYSENTFFTEYKK  
Bactrian camel LSKILEPTLRGLAECCNSGESTACLHEKGPQLKELSSFIAKGQELCADYSENTFFTEYKK  
Dolphin LSKILEPTLKSLSDECCHSESDAACFNAKGPQLTRELSSFIEKGQELCADYSENTFFTEYKK  
Killer whale LSKILEPTLKSLSDECCHSESDSTACFNAKGPQLTRELSSFIEKGQELCADYSENTFFTEYKK  
Cow LTKILESTLKSLSDECCHSESDSTACFNAKGPQLTRELSSFIEKGQELCADYSENTFFTEYKK  
Sheep LSKILEPTLKSLSDECCHSESDAACLNEKGPQLTRELSSFIEKGQELCADYSENTFFTEYKK  
Goat LSKILEPTLKSLSDECCHSESDAACLNEKGPQLTRELSSFIEKGQELCADYSENTFFTEYKK  
Horse LSKILDSTLKNLDECCHSESDSTACFNAKGPQLKELSSFIEKGQELCADYSENTFFTEYKK  
White rhinoceros LSKILEPTLKSLSDECCHSESDAACFKAKGPQLKELSSFIDKGQELCGDYSENTFFTEYKK  
Cat LSKILEPTLKSLSAECCSESDAACINTQGPQLKELSSFIDKGQKLCADYSENTFFTEYKK  
Dog LSKILEPTLKSLSAECCSESDSTGCMNAQGPQLKELSSFIDKGQKLCADYSENTFFTEYKK  
Ferret LSKILEPTLKSLSDECCHSSEDSTGCMNAQGPQLKELSSFIEKGQKLCADYSENTFFTEYKK  
Panda LSKILEPTLKSLSAECCSESDSTGCMNAQGPQLKELSSFIDKGQKLCADYSENTFFTEYKK  
Pacific walrus LSKILEPTFKLSAECCSESDATGCMNAQGPQLKELSSFIDKGQKLCADYSENTFFTEYKK  
Weddell seal LSKILEPTFKLSAECCSESDATGCMNAQGPQLKELSSFIDKGQKLCADYSENTFFTEYKK  
Megabat LSKILAPTLKSLADCCSESDAACFNAKVPQLKELSSFIDKGQELCADYSENTFFTEYKK  
David's myotis LSKILEPTFKTLGECCKSKDPAVCFDAKVPQLKELSSFIDKGHEL CADYSENTFFTEYKK  
Microbat LSKILEPTFKSLGECCKSKDPAVCFDAKVPQLKELSSFIDKGHEL CADYSENTFFTEYKK  
Hedgehog LSKILEPTLKSLSDECCHSESDSTCFNMEAPLLKELSTFIENGQELCADYSENTFFTEYKK  
Shrew LSKILEPTLKSLSDECCHSSEDSTGCMNAQGPQLKELSSFIEKGQELCADYSENTFFTEYKK  
Star nosed mole LSKILVPTLKSLSAECCSESDSTACFNAKGPQLKELSSFIEKGQELCADYSENTFFTEYKK  
Elephant LTTVLEPTLISLGECCSESDSTCFNTKGPLLKELSSFIEKGQMCADYSENTFFTEYKK  
Hyrax LSKALQPTLKGELGECCKSESDSTACFNTKGPQLKELSSFIEKGQELCADYSENTFFTEYKK  
Cape golden mole LSKALEPTLKSLSAECCSESDYACFLAKGPLLKELSSFIEKGQELCADYSENTFFTEYKK  
Tenrec LSKALDATLTSLECCSGDAAACLQAKGPLLQKELSSFIEKGQELCADYSENTFFTEYKK  
Armadillo LSKILDPTLKSLSDECCKDSTACFKAKAPLLQKELSSFIDKGQELCADYSENTFFTEYKK  
Sloth LSKILEPTLKSLSDECCKDSTACFKAKAPLLQKELSSFIEKGQELCADYSENTFFTEYKK  
Tasmanian devil VTKLHGLMFKVMSDCKSVEPEACLRQRPLARNEMALFFTKAEELCGDFSQHTFFTEYKK  
Platypus LSKILDGITRAVSGCCSGEDPHTCGLGVVRSQMKREMVVYLAKAKELCGDYSELFFTEYKK

Human KLAERLKAKLPDATPTELAKLVNKRSDFASNCCSINSPPLYCDSEIDAELKNIL  
Chimpanzee KLAERLKAKLPDATPTELAKLVNKRSDFASNCCSINSPPLYCDSEIDAELKNIL  
Bonobo KLAERLKAKLPDATPTELAKLVNKRSDFASNCCSINSPPLYCDSEIDAELKNIL  
Gorilla KLAERLKAKLPDATPTELAKLVNKRSDFASNCCSINSPPLYCDSEIDAELKNIL  
Orangutan KLAERLRKAKLPDATPTELAKLVNKRSDFASNCCSINSPPLYCDSEIDAELKNIL  
Gibbon KLAERLRKAKLPDATPTELAKLVNKRSDFASNCCSINSPPLYCDSEIDAELKNIL  
Rhesus KLAEQLRKAKLPDATPTELAELVNKRKRAFASNCCFTNSPPLYCGSEIDAELKNIL  
Crab-eating macaque KLAEQLRKAKLPDATPTELAELVNKRKRAFASNCCFTNSPPLYCGSEIDAELKNIL  
Olive baboon KLAEQLRKAKLPDATPTELAELVNKRKRAFASNCCFTNSPPLYCDSEIDAELKNIL  
Marmoset KLAERLGAKLPDVTPKLAELVDRRSDFASHCCSVNSPPLYCDSEIDTELKNIL  
Squirrel monkey KLSERLRKAKLPDVTPKELAGLVDRRSDFASHCCSVNSPPLYCDSEIDTELKNIL  
Tarsier KLAERLKAKLPDATPTELAELVNKRSDFASKCCSINSPPLYCDSEIDAEMKNAL  
Mouse lemur -----  
Bushbaby KLAERLRKAKLPDAEPTLEALLEKRSDFASKCCFVNSPPLYCDSQFGVHPLPLNV  
Chinese tree shrew KLAERLAAKQPDATPSQLAKLVEERSDFASKCCSINSPPLYCDSEIDAVMKNI-  
Squirrel KLEERLRKAKMPNATPMELTGVVDKLSDFASKCCSINSPPLYCGSQIDAEMKDIL  
Ground squirrel KLEERLRKAKMPNATPMELTGVVDKLSDFASKCCSINSPPLYCGSQIDAEMKDIL  
Golden hamster KLAERLRKAKMPNATPMELTGVVDKLSDFASKCCSINSPPLYCDSQIDAEMKDIL  
Kangaroo rat KLTERLRKAKYPDVMPDYLEALVHRNSDFASKCCSMNSPPLYCDSLIDNEMKDV  
Mouse KLAERLRKAKMPNATPMELTGVVDKLSDFASKCCSINSPPLYCDSQIDAEMIDTL  
Rat KLAERLRKAKMPNATPMELTGVVDKLSDFASKCCSINSPPLYCDSQIDAEMRDIL  
Naked mole rat KLSERLRKAKLPDATPTELAGLVDRRSDFASKCCSINSPPLYCDSQIDAEMKDIL  
Guinea pig KLTERLRKAKLPDATPTELAGQVERHSDFASKCCSINSPPLYCDAQVRRHRNVLL  
Rabbit KLSQQLRAKLPDATSMELADVKNKHSDFASKCCSINSPPLYCDSEIDAELKNIL  
Pika KLSQQLRAKLPDATSMELADVKNKHSDFASKCCSINSPPLYCDSE-----  
Pig KLAERLRGKLPDATPTELEELVDRRSDFASKCCSINSPPLYCDSEVNHDIPISS  
Alpaca KLAERLRGKLPDATPTELEELVDRRSDFASKCCSINSPPLYCDSEIDAEMNTL-  
Bactrian camel KLAERLRGKLPDATPTELEELVDRRSDFASKCCSINSPPLYCDSEIDAEMNTL-  
Dolphin KLAERLRGKLPDATPTELEELVDRRSDFASKCCSINSPPLYCNSEIDAEMNTLQ  
Killer whale KLAERLRGKLPDATPTELEELVDRRSDFASKCCSINSPPLYCNSEIDAEMNTLQ  
Cow KLAERLRGKLPDATPTELEELVDRRSDFASKCCSVNSPPLYCNSEIDAEMINTLQ  
Sheep KLAERLRGKLPDATPTELEELVDRRSDFASKCCSINSPPLYCSEIDAEMINTLQ



|                  |                                                         |
|------------------|---------------------------------------------------------|
| Goat             | KLAERLRGKFPDATETDLQELVAKLSDFASKCCSINSPPLYCSSEIDAEINTLQ  |
| Horse            | KLAERLRAKLPDAAATELEELVGKRSDFASKCCSINSPPLYCDSEIDAEMK--N  |
| White rhinoceros | KLAERLRAKLPDATATELEELVEKRSDFASKCCCTINSPPLYCDSEIDAEMK--N |
| Cat              | KLAERLSAKLPDVSALELQGLIDKRSDFASKCCSINSPPLYCDSEV-----     |
| Dog              | KLAEGLKAQFPDASATDLQGLIDKRSDFASKCCSINSPPIYCDSET-LKAKEIR  |
| Ferret           | KLAEQLKAQLPDASALELQGLIDKRSDFASKCCSINSPPLYCDSEIDVEMKNIL  |
| Panda            | KLAEQLKAQMPDASSMDLQGLIDRRSDFASKCCSINSPPLYCDSEVR-KFNPLL  |
| Pacific walrus   | KLAEQLRAQFPDASAVELQGLIDKRSDFASKCCSINSPPLYCDSEIDVEMKNIL  |
| Weddell seal     | KLAEQLRAQLPEASAMELQGLIDKRSDFASKCCSINSPPLYCDSEIDVEMKNIL  |
| Megabat          | KLAERLKAKLPDATATELEGLVDRSDFASKCCSLNSPPLYCDSEIDAEMKNTL   |
| David's myotis   | KLTERLRAKLPDAPDTELEELVEKRSDFASKCCSINSPPLYCDAKIDAEMKNTL  |
| Microbat         | KLTERLRAKLPDAPDTELEELVNKRSDFASKCCSINSPPLYCDAEIDAEMKNTL  |
| Hedgehog         | KLAGRLRKTLPDATDAQLEELIEKRSDFASKCCSINSPPLYCNS-----       |
| Shrew            | KLAGRLRAKLPDASDSELEELVDRSDFATKCCSMNSPPLYCDSEIDAEMKNTL   |
| Star nosed mole  | KLAERLRAKLPDATDTELEELVDRSDFATKCCSINSPPLYCDSELGNQLTFLV   |
| Elephant         | KLAERLRAKLPDATPTDLADLVDRSDFASKCCSINSPPLYCNSQVGFANSLLT   |
| Hyrax            | KLAERLKAKLPDVAPADLAELADKRSDFASKCCSVNSPPLYCDAEIDAQMKILP  |
| Cape golden mole | KLAERLRAKLPDPTPTDLAKLVKHSDFASKCCYINSPPLYCDSEVGANTIQLL   |
| Tenrec           | KLTERLRAKLPDTSATDLAQLVDRSDFASKCCSINSPPLHCDSEIEAEMKNIL   |
| Armadillo        | KLAERLRAKLPDPTSTDLGELVNKFSDFASKCCFINSPPIYCSSEIDAQMNS--  |
| Sloth            | KLAERLRAKLSDATSTDLELVDFKFSDFASKCCSINSPPLYCDSE-----      |
| Tasmanian devil  | RLTEHFKTKFPETNSKIIEKEMVENRTDFASKCCLMNSPPLYCNTQIDTEIKNFC |
| Platypus         | GLTEKFSQKQPDASPATIKELVERRATFASSCCISNAPPRYCSTQVPAPRPLSF  |

## ALPHA-FETOPROTEIN

|                     |                                                                |
|---------------------|----------------------------------------------------------------|
| Human               | MKWVESIFLIFLLNFTESTRTLHRNEYGIASILDSYQCTAEISLADLATIFFAQFVQEATY  |
| Chimpanzee          | MKWVESIFLIFLLNFTESTRTLHRNEYGIASILDSYQCTAEINLTDLATIFFAQFVQEATY  |
| Bonobo              | MKWVESIFLIFLLNFTESTRTLHRNEYGIASILDSYQCTAEINLTDLATIFFAQFVQEATY  |
| Gorilla             | MKWVESIFLIFLLNFTESTRTLHRNEYGIASILDSYQCTAEISLADLATIFFAQFVQEATY  |
| Orangutan           | MKWVESIFLIFLLNFTESTRTLHRNEYGIASILDSYQCAAEINLTDLATIFFAQFVQEATY  |
| Gibbon              | MKWVESIFLIFLLNFTESTRTLHRNEYGIASILDSYQCTAEINLADLATIFFAQFVQEATY  |
| Rhesus              | MKWVESIFLIFLLNFTESTRTLHRNEYGIASILDSYQCTAEINLPDLATIFFAQFVQEATY  |
| Crab-eating macaque | MKWVESIFLIFLLNFTESTRTLHRNEYGIASILDSYQCTAEINLPDLATIFFAQFVQEATY  |
| Olive baboon        | MKWVESIFLIFLLNFTESTRTLHRNEYGIASILDSYQCTAEINLPDLATIFFAQFVQEATY  |
| Marmoset            | MKWVGSIFLIFLLNFTESTRPHRNEYGIASILDSYQCTAEINLTDLATIFFAQFIQEATY   |
| Squirrel monkey     | MKWVGSIFLIFLLNFTESTRPLRNEYGIASILDSYQCTAEINLTDLATIFFAQFVQEATY   |
| Tarsier             | MKWVESIFLIFLLSFAESRTLHRNEYGIASILDSSQCKEEVNLANLATIFYAQFFQVATY   |
| Mouse lemur         | MKWVESIFLIFLLSFAESRTLHRNEYGIASILDSSQCTADMNLADLATIFFAQFVQEATY   |
| Bushbaby            | MKWVELFVLIIFLLSFTESRTLHRNAYGIASILDSSRCSTEVNLADLATIFFAQFIQEAPY  |
| Chinese tree shrew  | MRWLVSISLILLNFTESTRTLHNAYGIASVLDSSQCSAEVNLVNIATIICAQFVKEATY    |
| Squirrel            | MKWVVSIFLAFLLTFTESTRTLHNAYGIASVLDSSQCSAEVNLVLDLTTIFFAQFVHGATY  |
| Golden hamster      | MEWRVAIFFVFLNVAESRMLHKHEFGIASTLDSSQCSTEKNMLSLATITFSQFVPEATF    |
| Kangaroo rat        | MKYAIPILLISLLSLSSEKTLHRNAYGKDSTLDSSQCSKKNLVNLATIFLAQFVEKATY    |
| Mouse               | MKWITPASLILLLHFAASKALHENEFGIASTLDSSQCVTEKNVLSIATITFTQFVPEATE   |
| Rat                 | MKWSASISFLLLLNFAEPRVLHTNEFGIESTLDSSQCPTEKNMNFVATIVVAQFVQDATK   |
| Naked mole rat      | MKWLVSILILIFLLRFTDSRTLHNAYGIASVLDSSQCSSEMNLADLATIFFAQFVQEATY   |
| Guinea pig          | MKLVASVILVFLLCFTDSKTLHNAYGIASVLDSSQCSSEMNLANVATILFSQFVQDATY    |
| Rabbit              | MKWVVSIFLL-LLNFTESTRTLHRNAYGIASILDSSKCSAGMNLVLDLATIFVTQFAQEATY |
| Pika                | MKSVISMFLFLLSVAESRTLHTNEYGIASILDSSLQCSAEKNLVLDLATISLAQFVPEATY  |
| Pig                 | MKWVVSIFLIVLLNFTESTRMHNAYGIASILDSSQCSAEMNLVLDLATIFFAQFVQEATY   |
| Alpaca              | MKWIVSIFLIFLLNFTESTRMHKNAYEIASILDSSQCSAEMNLVGLATIFFAQFVQEATY   |
| Bactrian camel      | MKWIVSIFLIFLLNFTESTRMHKNAYEIASILDSSQCSAEMNLVGLATIFFAQFVQEATY   |
| Dolphin             | MKWEVSIFLIFLLNFTESTRMQKNAYGIASILDSSPCSAEMNVLDLATIFFAQFVQEATY   |
| Cow                 | MKWVVSFLLFLLNFSDSRTMHKNAYGIDSILDSSPCSSGTLNVGLATIFFAQSVQEATY    |
| Horse               | MKWVVSILLIFLLNFTESTRMHSNAYGIASALDSFQCSPEMNLVLDLATIFFAQFVQEATY  |
| Cat                 | MKWVISIFLIFLLNFSEPRMHRNAYGIASILDSSQCSAEMNVLDLATIFFAQFVQEATY    |
| Dog                 | MKWVVSFFSIFLLNFSESRMHRNAYGIASILDSSQCSAEMNLVLDLATIFFAQFVQEATY   |
| Ferret              | MKWVVSIFLIFLLNFSESRMHRNAYGIVSILDSSQCSAEVNLVLDLATIFFAQFVQEATY   |
| Panda               | MKWVVSISLIYLLNFSESRMHRNAYGIASILDSSQCSAEMNLADLATIFFAQFVQEATY    |
| Pacific walrus      | MKWVVSISLIFLLNCSERSTMHRNAYGIASILDSSQCSAEMNLVLDLSTIFFAQFVQEATY  |
| Weddell seal        | MKWVVSISLIFLLNFSESRMHRNAYGIASILDSSQCSAEMNLVLDLATIFFAQFVQEATY   |
| Black flying fox    | MKWALSIFL-ILLNITESRSTMHSNMYGMASILNSSQCSAEVNLVLDLATIFFAQFVQEATY |
| Megabat             | MKWALSIFL-----SILNSSQCSAEVNLVLDLATIFFAQFVQEATY                 |

Microbat MKWVVSILLIFLLNTTESRTHHNNAYGIASILDSSQCSAEVNLADLATIFFAQFVQEATY  
Hedgehog MKWVVSIAFFIFLLSFSESRTHHRNAYGIASILDSSQCTMEVNLDDAFTILFAQFVQDASY  
Shrew MKWVVSIFLIFLLSFTESTRALYKTVSGAASMLNSSQCFSETNLVNLATIFFAQFVIEEAY  
Hyrax MKLVVAIFLIFVFNFTDSRTLHKNAYGVASLLNSSICSEMNLVDLATIFFAQFVQEATY  
Elephant MKWIVAISLISLLNFAESRTLHKNAYGIASVLNSSQCSYKTNLADIATIFFAQFVQEATY  
Cape golden mole MKWLV-ILLISLLRFTESTRTHHNNAYGIASVLNSPQCSSEMNIDDLATIFFAQFVPKATY  
Tenrec MKWVVSIFVIFLLNFSESRTHMHTNAYGIASVLHSFQCSTEMDLVDLATIFFAQFIQEATY  
Armadillo MKWVVSIFVIFLLNFSESRTHMHTNAYGIASVLHSFQCSTEMDLVDLATIFFAQFIQEATY  
Sloth MKWVVSIFVIFLLNFSESRTHMHTNAYGIASILHSSQCSSEMMDLVDLSTIFFAQFVQEATY  
Opossum MKWEASIFLLLFLSFAESKLLHTSALELGSTSNPSHSITEANLRDLATIFFVQFIPPEATY  
Tasmanian devil MKWETSILLLLILFGFAEPKILHSSSSDIVSTTNPPQCSTEGNLVDIATIFFAQFIPEATY  
Wallaby MKWETSILLLVLLGFAESKILHTGTSGIASAPSSPQCTTEGNLADIATIFFAQFIPEATY

Human KEVSKMVKDALTAIEKPTGDEQSSGCLNQLPAFLEELCHEKEILEKYGHSDCCSQSEEG  
Chimpanzee KEVSKMVKDALTAIEKPTGDEQSSAGCLNQLPAFLEELCREKEILEKYGHSDCCSQSEEG  
Bonobo KEVSKMVKDALTAIEKPTGDEQSSAGCLNQLPAFLEELCHEKEILEKYGHSDCCSQSEEG  
Gorilla KEVSKMVKDALTAIEKPTGDEQSSAGCLNQLPAFLEELCHEKEILEKYGLSDCCSQSEEG  
Orangutan KEVSKMVKDALTAIEKPTGDEQSSAGCLNQLPAFLEELCHEKEILEKYGLSDCCSQSEEG  
Gibbon KEVSKMVKDVLTAI----GDEQSSAG-KYFLLPAFLEELCHEKEILEKYGLSDCCSQSEEG  
Rhesus KEVSKMVKDVLTAIEKPTGDEQSSAGCLNQLPAFLEELCHEKIDILEKYGLSDCCSQSEEG  
Crab eating macaque KEVSKMVKDVLTAIEKPTGDEQSSAGCLNQLPAFLEELCHEKIDILEKYGLSDCCNQSEEG  
Olive baboon KEVSKMVKDVLTAIEKPTGDEQSSAGCLNQLPAFLEELCHEKIDILEKYGLSDCCSQSEEG  
Marmoset MEVSKMVKDVLTAIEKPAGEEQSAGCLNQLPAFLEEMCHEKEILEKYGLSDCCSQSEEG  
Squirrel monkey MEVSKMVKDVLTAIEKSTGEEQSAECFENQLPVFLEEMCHEKEILEKYGLSDCCSQSEEG  
Tarsier EEVSKMVKDVLTTIKKST----DNGCFENQLFTFLEEICHDKIESEKYGLSDCCSQSEEG  
Mouse lemur KEVSKMVKDVLAVIEKPT--ERTAGCFENQISVFLIEICHEKEISEKYGLSHCCSHSEEG  
Bushbaby REISKMVKDVLTVIEKPTGSGQASGCSENQISIFLIEICHEKEISEKYGLSDCCSQSDED  
Chinese tree shrew EEVSKMVKDVLTVIEKPTGSEQASGCFENQLPAFLEEICHEKEISEKYGLSDCCSRSEKE  
Squirrel PEIRKMTNHVLAIVIKKPTDE----CLENQMSAFLEEICHEKEIFEKYGLSDCCSRGEE  
Golden hamster EEINKMTNDVLTAIKKPTSEEQHGCLNQLMSVFLDEICHEKELSDKHGSHCCSQSGEE  
Kangaroo rat EEVSKMVTDLTVIKKPTDSEQPEGCLESPFAFMDIECHHEEISEKGLSDCCCKQSGEE  
Mouse EEVSKMVTSDVLAAMKNSGD----GCLESQSVFLDEICHETELSNKYGLSDCCSQSGVE  
Rat AEVSKMSSDALAAMKENTGD----GCLNQLSVFLDEICHETELSNKYGLSDCCNQSGVE  
Naked mole rat EEVSKMVTDLTLTVVKKPTGSEQPAECFENRLSAFLEEICHERAIAAGKYGLADCCAHSEEG  
Guinea pig EEVRKMVTDLTVIKKPTGSEQLAECLNQLSTFLEEICHERATHEKYGLADCCSRS-EE  
Rabbit EEISKMVRDVLTIKAPNKDSSASWLISLKLPAFLEEICHETEISEKGLAECCRQGGDD  
Pika EEVSKMTRDVLAVIEKASNSELPAGCLNQLPAFLEEICHETEISEKYGLAECCRQSGQE  
Pig KEVNQMVKDVLTVEIKSTGSEQPAAGCLNQLVSVFLIEICHEEEIPEKYGLSHCCSQSGEE  
Alpaca KEVSKMVRDVLTVIEKSTGSEKPTGCLNQLVSAFLEEICHEREIPEKYGLSDCCNQSGEE  
Bactrian camel KEVSKMVRDVLTVIEKSTGSEKPTGCLNQLVSAFLEEICHEREIPEKYGLSDCCNQSGEE  
Dolphin KEVSKMVKDVLTVIEKSTGSEQPAAGCLNQLVSAFLEEICHEKEIPKYGLSDCCSQSGEE  
Cow EEVSKMVKDVLTVIEKPTGSEQPAAGCLNQLVSAFLEEICHEKEIPEKYGLSDCCSQSGEE  
Horse KEVSKMVKDVLTVIEKSTGSEQPTGCSENRLSAFLEEICHEEEIPEKYGLSDCCSQSGEE  
Cat KEVSKMVKDILTVIEKSTGSEQPVGCLNQLSAFLEEICHEKEISEKYGLSDCCSQSEEG  
Dog KEVSKMVKDILTVIEKSTGSEQPGCLNQLPAFLEEICHEKEISEKYGLADCCSQREEE  
Ferret KDVSKMVKDILTVIEKSTGSEQPVGCLNQLVSAFLEEICHEKEISEKYGLSDCCSQSDEE  
Panda KEVSKMVKDILTVIEKSTGSEQPVGCLNQLSAFLEEICHEKEISEKYGLSDCCSQSEEG  
Pacific walrus KEVSKMVKDILTVIEKSTGSEQPVGCLNQLVSAFLEEICHEKEISEKYGLSDCCSQSEEG  
Weddell seal KEVSKMVKDILTVIEKSTGSEQPVGCLNQLVSAFLEEICHEKEISEKYGLSDCCSQSEEG  
Black flying fox KEVNKMVKDVLTVIEKPTGSEQPAAGCLNQLVSAFLEEICHEKEIPEKYGLSDCCSQREEE  
Megabat KEVNKMVKD-LTKIY----AEEKIGCAEILLSAFLEEICHEKEIPEKYGLSDCCSQREEE  
Microbat QEVNKMVKDVLTVIEKPTGSEQPAAGCLNQLVSAFLEEICHEKEISEKYGLSDCCSQSEEG  
Hedgehog PEVSKMAKDVLTVEIKPTGSEQPAAGCLNQLVSAFLEEICHEKEIPEKYGLSDCCSQSGQE  
Shrew PEVRKMVKDVLTVIEKPLGSDQPVGCLDQLSAFLEEICHEKEIVGKYGLSDCCNQNGKE  
Hyrax QEVNKM-----LSSFLDEICHEKEISDKYRFSDDCKTEEE  
Elephant QEVNKMILIDRIASLKE-----LYNNLSAFLEEICHEKEICEKYGLSDCCSQREEE  
Cape golden mole QEVTKMSKDVLTVIEKPTGSEQHAECAENQLSAFLEEICHEKEISEKYGLSDCCSKNEEE  
Tenrec QEVNKMVTNDVVAIVIKKPTGSEQHGECSDNQLSAFLEEMCHEKIDISEKYGLSDCCSKNEEE  
Armadillo KEVSKMVKDVLTVIEKPTGSEQPAAGCLNQLVSAFLEEICHEKEISEKYGLSDCCSKNEEE  
Sloth KEVSKMVKDILTVIEKSTGSEQPAAGCLNQLVSAFLEEICHEKEISEKYGLSDCCSKNEEE  
Opossum EEVDKLVKDFLADFERPVANEDPKDCLERQLSALLEEICHDKDISDKHGLADCCSVGSD  
Tasmanian devil QEVSKLVKDFLADFERPVANEDPKDCLERQLSALLEEICHDKDISDKHGLADCCSKAGN  
Wallaby QEIGKLVKDFLADFERPVANEDPKDCLERQLSALLEEICHDKDISDKHGLADCCSKAGN

Human RHNCFLAHKKPTASIPLFQVPEPVTSCAEYEDRETFMNFIIYEIARRHPFLYAPTILL

Chimpanzee RHNCFLAHKKPTPASIPFLQVPEPVTSCAYEEDRETFMKNFIYEIARRHPFLYAPTILL  
Bonobo RHNCFLAHKKPTPASIPFLQVPEPVTSCAYEEDRETFMKNFIYEIARRHPFLYAPTILL  
Gorilla RHNCFLAHKKPTPASIPFLQVPEPVTSCAYEEDRETFMKNFIYEIARRHPFLYAPTILL  
Orangutan RHNCFLAHKKPTPASIPFLQVPEPVTSCAYEEDRETFMKNFIYEIARRHPFLYAPTILL  
Gibbon RHNCFLAHKKPTPASIPFLQVPEPVTSCAYEEDRETFMKNFIYEIARRHPFLYAPTILL  
Rhesus RHNCFLAHKKPTPASIPVQVPEPVTSCAYEEDRETFMNRFIYEIARRHPFLYAPTILL  
Crab eating macaque RHNCFLAHKKPTPASIPVQVPEPVTSCAYEEDRETFMNRFIYEIARRHPFLYAPTILL  
Olive baboon RHNCFLAHKKPTPASIPVQVPEPVTSCAYEEDRETFMNRFIYEIARRHPFLYAPTILL  
Marmoset RHSCFLAHKKPTPTSMQLFQVPEPVVSCAYEEDRETFMKNFIYEIARRHPFLYAPTILL  
Squirrel monkey RHSCFLAHKKPTPTSMQLFQVPEPVMSCAYEEDRETFMKNFIYEIARRHPFLYAPTILL  
Tarsier RHKCLLAHRKTAPASIPPFQVPEPVTSCQAYKEDIETYMNRFIYEIVARRHPFLYAPTLLA  
Mouse lemur RLSCFLAHKKAAPASIPAFQVPEPVASCKAYEEDRETFLN-----  
Bushbaby RLNCLLTHKKPTPVSIIPFQVPEPILSCKAYEEDRAAFINRYIYEIARRNPFLYAPVVLS  
Chinese tree shrew RHDCMLSHKKATPASIPPHQVLEPATSCKAYEENRETFINKYIYEISRRHPFLYAPTILS  
Squirrel RHSCLLAHKKAAPA-LPPFQVPEPATSCKAYEEDRETFMNRFIYEISRRHPFLYAPTILS  
Golden hamster RHQCLLARKKTASASVLPFSFPEAAESCKAYKENREMFMRNVIYEVSRRFPFMYAPAILS  
Kangaroo rat RHKCFLAHKRAAPASITPFGPDPKRICQAYEENKETFINRYIYDVSRRHPFLYSPTVLS  
Mouse RHQCLLARKKTAPASVPPFQVPEPAESCKAHEENRAVFMNRFIYEVSRRNPFPMYAPAILS  
Rat RHQCLLARKKTAPDSVPPFHFPEAESCAYEENRAMSINTFIYDVSRRNPFLYAPTILY  
Naked mole rat RHKCFLARKKAATVSIPLQVPEPVTSCVYEEENREMFINKYIYEVSRRHPFLYPTALS  
Guinea pig RHKCLLTRKRAAPASIPPLQVPMVTSCAYEENRETVLNKYIYEVSRRHPFLYPTALS  
Rabbit RHRCFLAHKKAHASIPPFQVPEPVSGCKAYEENREAFMNRFIYEISRRHPFLYAPTILS  
Pika RHRCFLAHKKAATAASIPPFQVPEADTGCKAYEENREASVNRFIYEISRRHPFLYAPTILS  
Pig RHNCFLARKKAAPASIPPFQVPEPVTSCAYEENRELFMTRYIYEIARRHPFLYAPTILS  
Alpaca RHNCFLAHKKATPASIPPFQVPEPVTSCAYEENREWFMRNFIYEIARRHPFLYAPTILS  
Bactrian camel RHNCFLAHKKATSASIPPFQVPEPVTSCAYEENREWFMRNFIYEIARRHPFLYAPTILS  
Dolphin RHDCFLAHKKAAPASIPPFQVPEPVTSCAYEEDRELFMNRVYIYEIARRHPFLYAPTILS  
Cow RHDCFLAHKKAAPASIPPFVLEPVTSCSKYKENRELFINRYIYEIARRHPVLYAPTILS  
Horse RHNCLLARKKDSASIPPFQVPEPVTSCAYEENREMFNRVLYIYEIARRHPFLYSSTALY  
Cat RHNCLLAHKKATPSSIIPPFQVPEPVTSCAYEENRDMFNRYIYEIARRHPFLYAPTILS  
Dog RHNCFLAHKKAAPSIIPPFQVPEPVTSCAYEENRDMFMNRFIYEIARRHPFLYAPTILS  
Ferret RQNCLLAHKKAAPASIPPLQVPEPVTSCAYEENRDMFMNRFIYEIARRHPFLYAPTILS  
Panda RHNCLLGHKKAAPATIPPFQVPEPVTSCAYEENRDMFMNRFIYEIARRHPFLYAPTILS  
Pacific walrus RHNCLLTHKKAAPASIPPFQVPEPVTSCAYEENRDMFMNRFIYEIARRHPFLYAPTILS  
Weddell seal RHNCLLAHKKAAPASIPPFQVPEPVTSCAYEENRDMFMNRFIYEIARRHPFLYAPTILS  
Black flying fox RHNCLLTHKNAAPASIPPFQVPEPVTSCAYEESREIFMNRFIYEIARRHPFLYAPTILS  
Megabat RHNCLLTHKNAAPASIPPFQVPEPVTSCAYEESREIFMNRFIYEIARRHPFLYAPTILS  
Microbat RHNCFLAHKKAAPASIPPFQVPEPVTSCAYEESREIFMNRFIYEIARRHPFLYAPTILS  
Hedgehog RHDCLLAHKKAAPASIPAFQVPEPVSSCKAFEENRGAFMRNFIYEIARRHPVLYAPAILY  
Shrew RHSCLLARKKAASDFVSPFQVPEPVSSCKAYEENRETFMNRFIYDIARRHPFLYAPTILS  
Hyrax RHNCLLAHKKAAPASIPPFQVPEPVTGCKEYEEENRDMFMNRFIYEIVARRHPFMYAPTIVLL  
Elephant RHNCLLARKKAAPASIPPFQVPEPVTSCAYEENREMFMRNFIYEIARRHPFLYAPTIVLL  
Cape golden mole RHNCLLAHKKAAPATIPPFQVPEPVTGCKEYEEENRDMFMNRFIYEIARRHPFLYAPTIVLL  
Tenrec RHNCLLAHKKAAPATIPPFQVPEADAGCRAYEENRESFLNRFIYELARRHPFLYAPTILF  
Armadillo RHNCLLARKKAAPASIPPFQVPEPVTSCQAYEENQKFMNRFIYEIARRHPFLYAPTILS  
Sloth RPNCFLAHKKAALASIPPLQVPEPVTSCAYEENRKAFMNRFIYETARRYPFLYAPKILS  
Opossum RLGCLLAHKRGSAAASIPFQVPEAVHSCKAHGENPATFMNRFIYEITRRHPFLYAPTILS  
Tasmanian devil RLECLLAHKRSSAAASIPFQVPEPVTGCKEYEEENRDMFMNRFIYEISRRHPFLYAPAILS  
Wallaby RLECLLDHKGNAASIPFQVPEPVTGCKEYEEENRDMFMNRFIYEISRRHPFLYAPAILS

Human WAARYDKIIPSCCKAENAVECFQTKAATVTTELRESLLNQHACAVMKNFGTRTFQAITV  
Chimpanzee WAARYDKIIPSCCKAENAVECFQTKAATVTTELRESLLNQHACAVMKNFGTRTFQAITV  
Bonobo WAARYDKIIPSCCKAENAVECFQTKAATVTTELRESLLNQHACAVMKNFGTRTFQAITV  
Gorilla WAARYDKIIPSCCKAENAVECFQTKAATVTTELRESLLNQHACAVMKNFGTRTFQAITV  
Orangutan WAARYDKIIPSCCKAENAVECFQTKAATVTTELRESLLNQHACAVMKNFGTRTFQAITV  
Gibbon WAARYDKIIPSCCKAENAVECFQTKAATVTTELRESLLNQHACAVMKNFGTRTFQAITV  
Rhesus LAARYDKIIPSCCKAENAVECFQTKAASITKELRESLLNQHACAVMKNFGTRTFHAIIV  
Crab eating macaque LAARYDKIIPSCCKAENAVECFQTKAASITKELRESLLNQHACAVMKNFGTRTFHAIIV  
Olive baboon LAARYDKIIPSCCKAENAVECFQTKAASITKELRESLLNQHACAVMKNFGTRTFHAIIV  
Marmoset LAARYDKIIPSCCKVENAVECFQTKGASITKELRENSLFNQHACAVMKNFGLOTFQAITI  
Squirrel monkey LAARYDKIIPSCCKVANAVECFQTKGASITKELRENSLFNQHACAVMKNFGLOTFQAITI  
Tarsier LAGRYDKIIPSCCKADNAVECFQTKAASITKELKESLLNEHVCAVMKDFGPRTSQAITV  
Mouse lemur -----TV  
Bushbaby FAARYDKIIPSCCKAANAIECFQMKAAPIITKELRESLLNQHTCAVMKTFGPRTFQAIIV  
Chinese tree shrew LAARYDKIIPSCCKAENAVECFQTKGAPIAKELRESLLNQHCAVMKTRTFEPRTFQAITV  
Squirrel LAAGYDKIIPSCCKAENAAECFQTKTTSITKELKESLLNQHVCAVKRTFEPLIFQAITV

|                  |                                                               |
|------------------|---------------------------------------------------------------|
| Golden hamster   | LAAQYDKTVPVCCAENMEECFQAKRASIAKELKEGSLLEHVCVIRKFGSRNLQATTI     |
| Kangaroo rat     | SAARYAKIMPLCCKAENAAECFQTKTASINKELRESSLLNQHICAVMKHGDGPOTLQE--- |
| Mouse            | LAAQYDKVVLACCADNKEECFQTKRASIAKELREGSMLNEHVCSVIRKFGSRNLQATTI   |
| Rat              | LAAQYDKAVPACCKADNKEECFQTKRASMAKELREGSMLNEHVCSVIRKFGSRNLQAVLI  |
| Naked mole rat   | LAARYDKIFPSCCKAENAAECFQQAATSITKDLSESSLNQHVCVIRNFGPRNFQAVTI    |
| Guinea pig       | LAARYDKIFPSCCKAENAAECFQTEVAPITKDLQESSLLNQHACAVMRNFGPRTFQAITI  |
| Rabbit           | LATRYDKIIPCCKAENAVECFQTKAAPITKELREVSSLNQHVCVSMRNFSPPLTFQAITV  |
| Pika             | LAARYDKIIPSCQ TENALECFQTKAAPITKELREVSSLNQHVCVSMRNFEPPLTFQAVTV |
| Pig              | LAAQYDKIIPCCKAENAVECFQTKAASITKELRESSLLNQHMCTVMRQFGARTFRAITV   |
| Alpaca           | LAAQYDKVIPPCCKAENAVECFQTKAASITKELRESS-LNQHTCAVTRNFGPRTLQAITI  |
| Bactrian camel   | LAAQYDKVIPPCCKAENAVECFQTKAASITKELRESSLLNQHTCAVTRNFGPRTLQAITI  |
| Dolphin          | LAAQYDKVIPPCCKAENAVECFQTKAASITKELRESSLLNQHICAVMRKFGPRTFRAITV  |
| Cow              | VANQYNKIIPHCCKAENATECFETKVTSITKELRESSLLNQHICAVMGKFGPRTFRAITV  |
| Horse            | LASHYDKIISACCKSENAVECFQSKAATITKELRETSLLNQHVCAVIRNFGPRTLQAITV  |
| Cat              | LATHYGKIIPCCCKTENAVECFQTKTALITKELRESSLLNQHICAVMRNFGPRTFRAITV  |
| Dog              | LAAHYGKIIPCCKAENAVECFQTKTSLITKELRESSLLNQHICAVMRNFGPRTFRAITV   |
| Ferret           | LAGHYGKMIPACCKAENAVECFQTKTALITKELRDSLLNQHICAVMKNFGPRTFRAITV   |
| Panda            | LAAHYGKIIPCCKAENAVECFQTKTALITKELRDSLLVNHQICAVMKNFGPRTFRAITV   |
| Pacific walrus   | LAAHYGKIIPHCCVENAVECFQTKTALIIKELRDSLLNQHICAVMKNFGPRTFRAITV    |
| Weddell seal     | LAAHYSKIIPHCCKAENAVECFQTKTALIIKELRDSLLNQHICAVMKNFGPRTFRAITV   |
| Black flying fox | LASHYDKIIPCCKAENAVECFQTKAASITKELKESLLNQHICVSMRNFSGPRTFQAITI   |
| Megabat          | LASHYDKIIPCCKAENAVECFQTKAASITKELKESLLNQHICVSMRNFSGPRTFQAITI   |
| Microbat         | LAAHYDKIIPCCKAENAVECFQQAASITKELRESSLLNQHVCAVMRNFGPRTFQAITI    |
| Hedgehog         | LAGHYAKIISCC-AENPVECFQTKAPVTKELRENSLLNQHMCAVRRNFEFQVFAII      |
| Shrew            | LAARFDKIIPCCQAENAVECFQTKGAPLTKELRENSLLNQHVCSVLRKFGSPTFPALIA   |
| Hyrax            | FASRYDKMISLCC- DNATECFQSKAASLTKEIKESLLNQHVCAVIRKFEFRNIQSII    |
| Elephant         | LASRYDKIIPCCKAENATECFQTKGASITKQLGESSLLNQHVCAVIRKFEFRNIQSII    |
| Cape golden mole | AASYDKIIPCCKAENAVECFQTKAAPVTKELRENSLLNQHVCAVIRNFEFRTFQAITV    |
| Tenrec           | LASQYDKMIPCCCKADDAECFQTKAASITKELRENSLLNQHVCAVIRNFEFRTFQAITV   |
| Armadillo        | LAAHYDKIIPCCCKTENAVECFQTKAASITKELRESSLLNQHICAVMRNFGPRTFRAITL  |
| Sloth            | LAALYDKIIPSCCKAENAVECFQTKTASITKELRESSLANQHTCAVMRNFGIRTFOAMTL  |
| Opossum          | LAARYDKIISTCCQAENAVECFHNQAAPVTKDLREKSLISQHVCDVLRKFGERSFKAILL  |
| Tasmanian devil  | LAARYDQIIFNCCQAENAVECFHTKAAPVTKDLRESSISQHICGILRKFGRDRTFKAILL  |
| Wallaby          | -----AAPVTKELRENSLISQHLGCVRRKFGERTFKA----                     |

|                     |                                                                  |
|---------------------|------------------------------------------------------------------|
| Human               | TKLSQKFTKVNFTETIQKLVLDVAHVHEHCRCRGDVLDCLODGEKIMSYICSQDITLSNKIT   |
| Chimpanzee          | TKLSQKFTKVNFTETIQKLVLDVAHVHEHCRCRGDVLDCLODGEKIMSYICSQDITLSNKIT   |
| Bonobo              | TKLSQKFTKVNFTETIQKLVLDVAHVHEHCRCRGDVLDCLODGEKIMSYICSQDITLSNKIT   |
| Gorilla             | TKLSQKFTKVNFTETIQKLVLDVAHIHEHCRCRGDVLDCLODGEKIMSYICSQDITLSNKIT   |
| Orangutan           | TKLSQKFTKVNFTETIQKLVLDVAHVHEHCRCRGDVLDCLODGEKIMSYICSQDITLSNKIT   |
| Gibbon              | TKLSQKFTKVNFTETIQKLVLDVAHVHEHCRCRGDVLDCLODGEKIMSYICSQDITLSNKIT   |
| Rhesus              | TKLSQKFTKVNFTETIQKLVLDVAHVHEHCRCRGDVLDCLODGEKIMSYICSQDITLSNKIT   |
| Crab eating macaque | TKLSQKFTKVNFTETIQKLVLDVAHVHEHCRCRGDVLDCLODGEKIMSYICSQDITLSNKIT   |
| Olive baboon        | TKLSQKFTKVNFTETIQKLVLDVAHVHEHCRCRGDVLDCLODGEKIMSYICSQDITLSNKIT   |
| Marmoset            | TKLSQKFTKVNFTETIRKLVLDVAHVHEHCRCRGDVLDCLODGEKIIISYICSQDITLSNKIA  |
| Squirrel monkey     | TKLSQKFTKVNFTETIHKLVLDAHVHEHCRCRGDVLDCLODGEKIIISYICSQDITLSNKIT   |
| Tarsier             | TKLSQKFTKVNFTETIQKLVLDVTHVHEQCRCRGDVLDCLODGEKIIISVCSQDITLSNKIA   |
| Mouse lemur         | TKLSQKFTKVNFTETIQKLVLDVAHVHEQCRCRGDVLDCLODGERIMSYICSQDITLSNKIA   |
| Bushbaby            | TKLSQKFTRVNFTETIQKLVLDVAHIHEQCRCRGDVLDCLODGEKIMSYICSQDITLSNKIA   |
| Chinese tree shrew  | TKLSQKFTTRANFTETIQKLVLDVAHVHEECRCGNMLECLODGEKIMSYICSQDITLSNKIG   |
| Squirrel            | AKLSQKFPKANFTETIQKLVLDVAHIHEECRCGNVLECLODGEKIMSYICSRQDITLSNKIA   |
| Golden hamster      | IKMSQKFPKANFTETIEKLVLDVAHIHEECRCGNVLECLODGEKIMSYICSRQDITLSNKIA   |
| Kangaroo rat        | -----EKIMSYLCSQDITLSNKIA                                         |
| Mouse               | IKLSQKLTANFTETIQKLALDVAHIHEECRCGNVLECLODGEKIMSYICSQDITLSNKIA     |
| Rat                 | IKLSQKFPKANFTETIRKLVLDVAHIHEQCCHGNVLECLODGEKIMSYICSQDITLSNKIA    |
| Naked mole rat      | TKLSQKFPKANFTETIQKLVLDVAHIHEECRCGNVLECLODGEKIMSYICSKQDITLSNKIA   |
| Guinea pig          | TKLSQKFPKANFSEMQLVLDAHVHEECRCGNVLECLODGEKIMSYICSKQDITLSNKIA      |
| Rabbit              | VKMSQKLPKANFTETIQKLVLDVAHTHECCRCGNVLECLODGERIMSYICSQDITLSNKIA    |
| Pika                | TKLSQS--QANFTETIQKLVMDVAHIHQCCRCGNVLECLODGEKIMSYICSQDITLSNKIA    |
| Pig                 | TKLSQKFPKANFTETIQKLVLDVAHIHEECRCGNVLECLODGEKIMSYICSQDITLSNKIA    |
| Alpaca              | TKLSQKFPKANFTETIQKLALDVVHTHEECRCGNVLECLODGEKIMSYICSRQDITLSNKIA   |
| Bactrian camel      | TKLSQKFPKANFTETIQKLALDVVHTHEECRCGNVLECLODGEKIMSYICSRQDITLSNKIA   |
| Dolphin             | TKLSQKFPKANFTETIQRLVVDVAHVHEECRCGNVLECLODGEKIMSYICSRQDITLSNKIA   |
| Cow                 | TKVSQKFPKANFTETIQKLVMDVAHIHEECRCGNVLECLODGERVMSYICSQDITLSNKIA    |
| Horse               | TTLRSQRYSKANFTETIQKLVLDVAHAHEECRCGNVLEECVODGEKIMSYICSRQDITLSNKIA |
| Cat                 | TKLSQKFSKANFTETIQKLVLDVAHIHEECRCGNVLECLODGEKIMSYICSRQDITLSNKIA   |



|                  |                                                             |
|------------------|-------------------------------------------------------------|
| Dog              | TKLSQKFSKANFTEIQKLVLDVAHIHEECCRGVLECLQDGEKIMSYICSQQDILSSKIA |
| Ferret           | TKLSQKFSKANFTEIQKLVLDVAHIHEECCGGVLECLQDGEKIMSYICSQQDILSSKIA |
| Panda            | TKLSQKFSKANFTEIQKLVLDVAHIHEECCRGVLECLQDGEKIMSHICSQQDILSSKIA |
| Pacific walrus   | TKLSQKFSKANFTEIQKLVLDVAHIHEECCRGVLECLQDGEKIMSYICSQQDILSSKIA |
| Weddell seal     | TKLSQKFSKANFTEIQKLVLDVAHIHEECCRGVLECLQDGEKIMSYICSQQDILSSKIA |
| Black flying fox | TKLSQKFSKANFTEIQKLVLDVAHIHEECCRGVLECLQDGGKIMSYICSQQATLSSKIA |
| Megabat          | TKLSQKFSKANFTEIQKLVLDVAHIHEECCRGVLECLQDGGKIMSYICSQQATLSSKIA |
| Microbat         | TKLSQKFPQTNFTEIHKLVLDVAHIHEECCRGVLECLQDAEKIMFYICSQQDTLSSKIA |
| Hedgehog         | AKMSQRFPRANFTEIQKLVLDVHHEECCRGVLECLQDGGKIMSYICSQQDALSSKIT   |
| Shrew            | AKLSQKFPKANFSEIEKLVLDVAHVHEECCRGVLECLQDGGKIMSYICSQQDFLSSKMQ |
| Hyrax            | TKISQKFPANFTEIQKLVLDVAHIHEECCRGVLDLHHEGQIMSYICSQQDALSSREIA  |
| Elephant         | TKMSQKFPANFTEIQKMTLDSAHIHEECCRGVLECLHDGQEVMSYICSQQDALSSKIA  |
| Cape golden mole | TKLSQKFTKANFTEIQKLVLDVAHIHEECCRGVLECLHDGQEVMSYICSQQDNLSSKIA |
| Tenrec           | SKLTQKFPKANFTEIQKLVLDVHHEECCRGVLECLQDGGQAMMSYICSQQENLSSKIA  |
| Armadillo        | TKLSQKFSKANFTEIQKLVLDVAHIHEECCRGVLECLHDGQEVMSYICSQQDTLSSKIA |
| Sloth            | TKLSQKFSKANFTEIQKLVLDVAHIHEECCRGVLECLQHEQEIMSYICSQQDTLSSKIA |
| Opossum          | TKISQKFPKANFTVIRDLVLDGAHAHIECKGNVLECLQDRNEIMSYICSQQDVLSSKIQ |
| Tasmanian devil  | TKLSQKFPKANFTVIQNLVLDGAHVHMECCNGVPECLQDKNEIMSYVCSQKDILSNQVQ |
| Wallaby          | -----NEIMSYICSQKDSLSSKIQ                                    |

|                     |                                                                  |
|---------------------|------------------------------------------------------------------|
| Human               | ECCKLTTLERGQCI IHAENDEKPEGLSPNLNRFGLDRDFNQFSSGEKNI FLASFVHEYSR   |
| Chimpanzee          | ECCKLTTLERGQCI IHAENDEKPEGLSPNLNRFGLDRDFNQFSSGEKNI FLASFVHEYSR   |
| Bonobo              | ECCKLTTLERGQCI IHAENDEKPEGLSPNLNRFGLDRDFNQFSSGEKNI FLASFVHEYSR   |
| Gorilla             | ECCKLTTLERGQCI IHAENDEKPEGLSPNLNRFGLDRDFNQFSSGEKNI FLASFVHEYSR   |
| Orangutan           | ECCKLTTLERGQCI IHAENDEKPEGLSPNLSRFLGDRDFNQFSSGEKNI FLASFVHEYSR   |
| Gibbon              | ECCKLTTLERGQCI IHAENDEKPEGLSPNLNRFGLDRDFNQFSSGEKNI FLASFVHEYSR   |
| Rhesus              | ECCKLTTLERGQCI IHAENDEKPEGLSPNLNRFGLDRDFNQFSSGEKNI FLASFVHEYSR   |
| Crab eating macaque | ECCKLTTLERGQCI IHAENDEKPEGLSPNLNRFGLDRDFNQFSSGEKNI FLASFVHEYSR   |
| Olive baboon        | ECCKLTTLERGQCI IHAENDEKPEGLSPNLNRFGLDRDFNQFSSGEKNI FLASFVHEYSR   |
| Marmoset            | ECCKLTTLERGHCVINAENDEKPEGLSPNLNRFGLDKDFNQFSSSEKNI FLASYVHEYSR    |
| Squirrel monkey     | ECCKLTPLERGHCVINAENDEKPEGLSPNLNRFGLDKDFNQFSSSEKNI FLASYVHEYSR    |
| Tarsier             | ECCKLP ILELGQCI IHAENDEKPEGLSPNLNRFGLDRDFNQFSSGEKNI FLASFVHEYSR  |
| Mouse lemur         | ECCKLP TLELGQCI IHAENDEKPEGLSPNLNRFGLDRDFNQFSSGEKNI FLASFVHEYSR  |
| Bushbaby            | DCCTMPLLEFGQCI IHAENDDRPEGLSLNLRFLGDRDFNQFSSSTEKNI FLASFVHEYSR   |
| Chinese tree shrew  | KCKLP ILELGQCVIHTENDDQPEGLSPNLNRFGLDRDFNQFSSREKNI FLASFVHEYSR    |
| Squirrel            | ECCKLP TLELGHC I IHAENDDKPEGLSPTLNRFGLDRDFNQFSSAERNI FLASFVHEYSR |
| Golden hamster      | ECCKLP TLELGYC I IHAENDDKPEGLSPSLDGVLDGRNFGQLSSEKIMSMARFLYEYSR   |
| Kangaroo rat        | ECCKLPVLELGHC I IHAENDDKPEGLSPTLNRFGLDRDFNQFSSSEKIMFLASFVHEYSR   |
| Mouse               | ECCKLPMIQLGFC I IHAENGVKPEGLSLNPSQFLGDRNFAQFSSSEKIMFMAFLHEYSR    |
| Rat                 | ECCKLP TLELGYC I IHAENGDKPEGLTLNPSFLGDRNFAQFSSSEKIMFMAFLHEYSR    |
| Naked mole rat      | ECCKLP LLELGHC I IHAENDDKPEGLSSDLSKFLGDRDFGRFSPGKTMFLASFVHEYSR   |
| Guinea pig          | ECCKLPVLELGHC I IHAENDETPAGLSPELEGLGDRDFSRFTPGKTMFLASFVHEYSR     |
| Rabbit              | ECCKLP ILELGHC I IHAENDDKPEGLSPHLHRFLGDRDFNQFSSQKNI FLASFVHEYSR  |
| Pika                | ECCKLP ILELGHCVI IHAENDDKPEGLSPNLSGLLDRDFNQFSSQEKNI FLASFVHEYSR  |
| Pig                 | ECCKLP TLELGQCI IHAENDDKPEGLSPNLNRFGLGERDFNQFSSREKDLFMAFVHEYSR   |
| Alpaca              | ECCKLP TLELGHC I IHAENDDKPEGLSPNLNRLGERDFNQFSSREKDFSLARFVHEYSR   |
| Bactrian camel      | ECCKLP TLELGHC I IHAENDDKPEGLSPNLNRLGERDFNQFSSREKDFSLARFVHEYSR   |
| Dolphin             | ECCKLP TLELGHC I IHAENDDKPEGLSPTLNRFGLGETDFNQFSSREKDLFMAFVHEYSR  |
| Cow                 | ECCKLP TLELGHC I IHAENDDKPEGLSPVNRFLGDRDFNQFSSRDKDLFMAFVHEYSR    |
| Horse               | ECCKLP TVELAQCI IHAENDDKPEGLSPNLNRLGERDFNQFSSREKDLFMAFVHEYSR     |
| Cat                 | ECCKLP ILELGQCI IHAENDDTPEGLSPNLNRFGLGERDFNQFSSREKDLFMAFVHEYSR   |
| Dog                 | DCCKLP ILELGQCI IHAENDDKPEGLSPNLNRFGLGERDFNQFSSREKDLFMAFVHEYSR   |
| Ferret              | ECCKLP MLELGQCI IHAENDDKPEGLSPNLNRFGLGERDFNQFSSREKDLFMAFVHEYSR   |
| Panda               | ECCKLP ILELGQCI IHAENDDRPEGLSPNLNRFGLGERDFNQFSSREKDLFMAFVHEYSR   |
| Pacific walrus      | ECCKLP ILELGQCI IHAENDDKPEGLSPNLNRFGLGERDFNQFSSREKDLFMAFVHEYSR   |
| Weddell seal        | ECCKLP ILELGQCI IHAENDDKPEGLSPNLNRFGLGERDFNEFSSREKDLFMAFVHEYSR   |
| Black flying fox    | ECCKLP ILELGQCI IHAENDDKPEGLSPTLNRFGLGERDFNQFSSRDKDLFMAFVHEYSR   |
| Megabat             | ECCKLP ILELGQCI IHAENDDKPEGLSPTLNRFGLGERDFNQFSSRDKDLFMAFVHEYSR   |
| Microbat            | ECCKLP TLELGQCI IHAENDDKPEGLSPTLNRFGLGERDFNQFSSREKDLFMAFVHEYSR   |
| Hedgehog            | ECCKLP MLELGQCI IHAENDDKPEGLSPTLNRFGLGERDFNQFSSREKDLFMAFVHEYSR   |
| Shrew               | ECCKLP ILELGQCI IHAENDDKPEGLSPTLNRFGLGERDFNQFSSREKDLFMAFVHEYSR   |
| Hyrax               | GCKLP TLELGHC I IHAENDDKPRGLSPNINRFLGDRDFNQFSSLEKDLFMAFVHEYSR    |
| Elephant            | ECCKLP TLELAHCI IHAENDDKPEGLSPNINRFLGDRDFNQFSSLEKDLFMAFVHEYSR    |
| Cape golden mole    | ECCKLP ALELGHC I IHAENDDKPEGLSPNLGRFLGDRDFNQFSPLEKDLFMAFVHEYSR   |
| Tenrec              | ECCKLP PLELACY I IHAENDDQPEGLSPNLSRFLGDRDFKQFALKEKDLFMAFVHEYSR   |
| Armadillo           | ECCKLP ILELAQCI IHAENDDKPEGLSPNLKRFLGDRDFHQFSSVEKDLFLARYTVEYSR   |

Sloth ECCKLPTLELAQCI IHAENDDKPEGLSPNLNRF LGDRDFNQFSSVEKDFFLGRFAYEYSR  
Opossum ECCSLPLRDQGDICVNAENDDQPEGLSPDLRRFLGERKFNLYSSEEKDLFLARFVVEYSR  
Tasmanian devil ECCSLPLRDRGECIVGAENDGQPEGLSPNLRGFLEETKFHLYSSAEKDLFLARFVVEYSR  
Wallaby ECCTLPLQEQGECIVSAENDNRPEGLSPDLRRFLGERKFHLHSSEEKDLFLA-----

Human RHPQLAVSVILRVAKGYQELLEKCFQ TENPLECQDKGEEELQKYIQESQALAKRSCGLFQ  
Chimpanzee RHPQLAVSVILRVAKGYQELLEKCFQ TENPLECQDKGEEELQKYIQESQALAKRSCGLFQ  
Bonobo RHPQLAVSVILRVAKGYQELLEKCFQ TENPLECQDKGEEELQKYIQESQALAKRSCGLFQ  
Gorilla RHPQLAVSVILRVAKGYQELLEKCFQ TENPLECQDKGEEELQKYIQESQALAKRSCGLFQ  
Orangutan RHPQLAVSVILRVAKGYQELLEKCFQ TENPLECQDKGEEELQKYIQESQALAKRSCGLFQ  
Gibbon RHPQLAVSVILRVAKGYQELLEKCFQ TENPLECQDKGEEELQKYIQESQALAKRSCGLFQ  
Rhesus RHPQLAVSVILRVAKGYQELLEKCFQ TENPLECQDKGEEELQKYIQESQALAKRSCGLFQ  
Crab eating macaque RHPQLAVSVILRVAKGYQELLEKCFQ TENPLECQDKGEEELQKYIQESQALAKRSCGLFQ  
Olive baboon RHPQLAVSVILRVAKGYQELLEKCFQ TENPLECQDKGEEELQKYIQESQALAKRSCGLFQ  
Marmoset RHPQLAVSIIILRVAEGYQELLEKCFQ TENPLECQDKREEELQKYIQESQALAKQSCGLFR  
Squirrel monkey RHPQLAVSIIILRVAEGYQELLEKCFQ TENPLECQDKGEEELQKYIQESQALAKQSCGLFQ  
Tarsier RHPQLAVPVILRVAKGYQELLEKCFQ SENPLQCQDKGEEKELQKYIQESQALAKRSCGLFQ  
Mouse lemur RHPDLAVSVILRVAKGYQELLEKCFQ SENALECQDKGEEELQRYIQESQALAKRSCGLFQ  
Bushbaby RHPDLAVPVILRVAKGYQELLEKCFQ SENPLECQDKGEEELQKYIQESQALAKRSCGLFQ  
Chinese tree shrew RHLELAVPVILRVAKGYQEVLEKCFQ SENPLECQDKG---VVQKYIQES-AL-KQTCGLFQ  
Squirrel RHPCLAVPVILRVVVKGYQEVLEKCFQ QSEKPLECQDKGEEELQKYIQESQALAKRSCGLFQ  
Golden hamster RHTKFAVSVILRVAKTYQEMMEKCFQ TENPNVVCQDNNGEEVQKHIIESQALAKQSCALYQ  
Kangaroo rat RHTNLPVSVILRVATGYKEVVEKCFQ TENPLECQDKGEEELQKYVQEQALAKQSCALYQ  
Mouse THPNLPVSVILRIAKTYQEIILEKCSQSGNLPQCQDNLEELQKHIIESQALSKQSCALYQ  
Rat NHPNLPVSVILKTAKSYQEIILEKCSQSETPSKCQDNMEEELQKHIIESQALAKQSCDLYQ  
Naked mole rat RHTELAVSIIILRVANGYQELLEKCFQ SENTLECQNKGEQELQKYVQESQTMATRSCSLFQ  
Guinea pig RHTALAVSIIILRIANGYQELLEKCFQ SKNPLECQNKGEQELQKFIQESQAMATRSCGLYQ  
Rabbit RHPCLPVTIVILRTKGYQELLEKCFQ TGNPLECQDKGEEELQKYIQESQAVVKRSCDLYQ  
Pika RHPCLPVTIVILRTAKGYQEQLEKCAQDENPLACQNKGEEELQKYIQESQEVVKRSCDLYQ  
Pig RHPKLAVPVILRVAKGYQELLEKCSQSENPLECQDKGEEELQKYIQESQALAKRSCGLFQ  
Alpaca RHTKLAVPVILRVAKGYQELLEKCSQSEHPLECQDKGEEELQKYIQESQALAKRSCGLFQ  
Bactrian camel RHTKLAVPVILRVVVKGYQELLEKCSQSEHPLECQDKGEEELQKYIQESQALAKRSCGLFQ  
Dolphin RHTKLAVPIILRVARGYQELLEKCSQSGNPPECQDKGEEELQKYIQESQALAKRSCGLFQ  
Cow RHTKLAVPIILRVAKGYQELLEKCSQSENPLECQDKGEEELQKYIQESQALAKRSCGLFQ  
Horse RHTKLAVPVILRVAKGYQEFLEKCSQSENPLECQDKGEEELQKYIQEQALAKRSCGLFQ  
Cat RHTKLAVPVILRVAKGYQELLEKCSQSENPLECQDKGEEELQKYIQESQALAKRSCGLFQ  
Dog RHTKLAVPVILRVAKGYQELLEKCSQSENPLECQDKGEEELQKYIQESQALAKRSCGLFQ  
Ferret RHTKLAVPVILRVAKGYQELLEKCSQSENPLDCRDKGEEELQKYIQESQALAKRSCGLFQ  
Panda RHTKLAVPVILRVAKGYQELLEKCSQSENPLECQDKGEEELQKYIQESQALAKRSCGLFQ  
Pacific walrus RHTKLAVPVILRVAKGYQELLEKCSQSENPLECQDKGEEELQKYIQESQALAKRSCGLFQ  
Weddell seal RHTKLAVPVILRVAKGYQELLEKCSQSENPLECQDKGEEELQKYIQESQALAKRSCGLFQ  
Black flying fox RHPKLAVPVILRVAKGYQELLEKCSQSENPLECQDKGEEELQKYIQESQALAKRSCGLFQ  
Megabat RHTKFAVPVILRVAKGYQELLEKCSQSENPLECQDKGEEELQKYIQESQALAKRSCGLFQ  
Microbat RHTKFAVPVILRVAKGYQELLEKCSQSENPLECQDKGEEELQKYIQENQALAKRSCGLFQ  
Hedgehog RHLELAIPVILRVIKTYLEMEKCAQSENPLECQDKGEEELQKHIIESQALSKRSCGLFQ  
Shrew RHSELSTSAILRSAEFFQKLENCQSENPLECQDKGEIEMEKHTQESRAFAKRSCGTFR  
Hyrax RHPCLAVPIVILRVAKGYEELLEKCSHSENHLECQDKGEEELQKYIQESQALAKRSCGLFQ  
Elephant RHPCLAVPVILRVVVKGYQELSEKCSQSENPLECQDKGEEELQKYIQESQALAKRSCGLFQ  
Cape golden mole RHPKLAVPVILRVAKGYQELLEKCSQSENHLECQDKGEEELQKYIQESQTLAKRSCDLFQ  
Tenrec RHPCLAVPVILRVAKGYQELLEKCSQSENPLECQDKGEEELQKYIQESRALAKRSCGLFQ  
Armadillo RHPEFAVTVILRVAKGYQELLENCQSENPLECQDKGEEELQKYIQESQTIAKRTCGFLFQ  
Sloth RNTDLAIPVILRVTKGYQELLENCQSENPLECQDKGEEELQKYIQESQALAKRSCGLFQ  
Opossum RHQDLAVPVILRVAKGYQEALEKCSKTENPSECQDKGEEELQKHYVQDSQALAKRSCGLFQ  
Tasmanian devil RHQELPVPVILRIAKGYQIALEKCPQ TENPLECRDKGEEELQKHYVQDSQALAKRSCGLFQ  
Wallaby -----EEEINKYVQDSQALAKRSCGLFQ

Human KLGEYYLQNAFLVAYTKKAPQLTSSSELMAITRKMAATAATCCQLSEDKLLACGEGAADI I  
Chimpanzee KLGEYYLQNAFLVAYTKKAPQLTSSSELMAITRKMAATAATCCQLSEDKLLACGEGAADI I  
Bonobo KLGEYYLQNAFLVAYTKKAPQLTSSSELMAITRKMAATAATCCQLSEDKLLACGEGAADI I  
Gorilla KLGEYYLQNAFLVAYTKKAPQLTSSSELMAITRKMAATAATCCQLSEDKLLACGEGAADI I  
Orangutan KLGEYYLQNAFLVAYTKKAPQLTSSSELMAITRKMAATAATCCQLSEDKLLACGEGAADI I  
Gibbon KLGEYYLQNAFLVAYTKKAPQMTSSSELMAITRKMAATAATCCQLSEDKLLACGEGAADI I  
Rhesus KLGEYYLQNAFLVAYTKKAPQLTSSSELMAITRKMAATAATCCQLSEDKLLACGEGAADI I  
Crab eating macaque KLGEYYLQNAFLVAYTKKAPQLTSSSELMAITRKMAATAATCCQLSEDKLLACGEGAADI I  
Olive baboon KLGEYYLQNAFLVAYTKKAPQLTSSSELMAITRKMAATAATCCQLSEDKLLACGEGAADI I

|                    |                                                                |
|--------------------|----------------------------------------------------------------|
| Marmoset           | KLGEYYLQNVFLIAYTKKAPQLTSSSELVAITRMAATAATCCQLSEDELLACGEGAADII   |
| Squirrel monkey    | KLGEYYLQNVFLIAYTKKAPQLTSSSELVAITRMAATAATCCQLSEDELLACGEGAADII   |
| Tarsier            | KLGEYYLQNAFLVAYTKKAPQLTSSSELIAFTRKMAAAGATCCQLSDDKLLACGEGAADLI  |
| Mouse lemur        | KLGEYYLQNAFLVAYTKKAPQLTSSSELMAALTRKMATAGATCCQLSEDRQLACGEGAADLI |
| Bushbaby           | KLGEYYLQNAFLVAYTKKAPQLTSAELMAFTRKMATAGATCCQLSEDRQLACGEGAADLI   |
| Chinese tree shrew | KLGEYHLQTAFLVYTKKAPQLTSSSELLANTRRMVTAATCCQLSEDKQSACIETATDLI    |
| Squirrel           | KLGEYYLQNAFLVSYVKKVPQMTLTELMAALTRKMAATAATCCQLSEDKQLACGEGAADLI  |
| Golden hamster     | KLGEYYLQKVFLLIAYTRKVPQLTSAELIDLTSKMVSIASSTCCQLSEENWSACGEGAADLF |
| Kangaroo rat       | KLGDYFFQN-----CCPL--EDKRLACGEGAADLI                            |
| Mouse              | TLGDYKQLQNLFLIGYTRKAPQLTSAELIDLTKMVSIASTCCQLSEKWSGCGEGMADIF    |
| Rat                | KLGPYYLQNLFLIGYTRKAPQLTSAELIDLTKMVSIASTCCQLSEKRSACGEGGLADIY    |
| Naked mole rat     | KLGEYYLQNAFLIAYTKKAPQLTSSSELMAFTRKMTAATAATCCQLSGDKQLACGEGAADLI |
| Guinea pig         | KLGEYHLQNSFLIYTKKAPQLTSSSELMAFTRKMTAATAATCCQLSGDKQLACGEGAADLI  |
| Rabbit             | KLGEYFNQNVFLVSYTKKAPQLTSPELIALTRKMAAKAACCHLSEDKRLACETAADLV     |
| Pika               | KSGHYFLQNAFLVAYTKKAPQLTSAELMAFTRKMTAATAATCCQLSEDKRLACSETADLV   |
| Pig                | KLGEYYLQNAFLVAYTKKAPQLTPELMALTRKMATGAACCHLSEDRQLACGEGAADLI     |
| Alpaca             | KLGEYYLQNAFLVAYTKKAPQLSPELMALTRKMATGATCCHLSEDKQLACGEGAADLI     |
| Bactrian camel     | KLGEYYLQNAFLVAYTKKAPQLTPELMALTRKMATGATCCHLSEDKQLACGEGAADLI     |
| Dolphin            | KLGEYYLQNAFLVAYTKKAPQLTSAELMTLTRKMATGATCCHLSEDKQLACGEGSADLI    |
| Cow                | KLGEYYLQNAFLVAYTKKAPQLTSPELMALTRKMANAGAI CCHLSEDKQLACGEGVADLI  |
| Horse              | KLGDYLLQNAFLVAYTKKAPQLTPELIALTRKMATATAATCCQLSEDKQLACGEGVAGLI   |
| Cat                | KLGEYYLQNAFLVAYTKKAPQLTPELMAFTRKMATATAATCCQLSEDKQLACGEGAADLI   |
| Dog                | KLGEYYLQNAFLVAYTKKAPQLTPELMAFTRKMATATAATCCQLSEDRQLACGEGAADLI   |
| Ferret             | KLGEYYLQNAFLVAYTKKAPQLTPELMAFTRKMATATAATCCQLSEDKQLACGEGAADLI   |
| Panda              | KLGEYYLQNAFLVAYTKKAPQLTPELMAFTRKMATATAATCCQLSEDKQLACGEGAADLI   |
| Pacific walrus     | KLGEYYLQNAFLVAYTKKAPQLTPELMAFTRKMATATAATCCQLSEDKQLACGEGAADLI   |
| Weddell seal       | KLGEYYLQNAFLVAYTKKAPQLTPELMAFTRKMATATAATCCQLSEDKQLACGEGAADLI   |
| Black flying fox   | KLGEYYLQNAFLVAYTKKAPQLTPELMAATRKMATAATAATCCQLSEDKQLACGEGAADLI  |
| Megabat            | KLGEYYLQNAFLVAYTKKAPQLTPELMAATRKMATAATAATCCQLSEDKQLACGEGAADLI  |
| Microbat           | KLGEYYLQNAFLVAYTKKAPQLTPELMTYTRKMASAAATCCRLSEKQLACGEGAADVI     |
| Hedgehog           | KLGEYYLQNAFLVAYTKKAPQLTPELMTFTKMATATAATCCQLSEDKQLACGEGAAAADLI  |
| Shrew              | KLGNYYLQNTFLVAYTKKAPQMPAPELMVFTREMARAAAACCHLSEDKQLACGEGAADLI   |
| Hyrax              | KLGEYYLQNAFLVAYTKKAPQLTRELIAVTRQMAATGATCCHLSEDKQLACGEGAADLI    |
| Elephant           | KLGEYYLQNAFLVAYTKKAPQLTPELIALTRKMAATGATCCHLSEDKQLACGENAADLI    |
| Cape golden mole   | NLGEYYLQNEFLVAYTKKAPQLTPELALTRKMAATGTACCHLSEKQLACGEGAADLI      |
| Tenrec             | KLGEYFFQNALVAYTKKAPQLTPELIALTRTMAATGASCCQLGEDKQLACGENAADLI     |
| Armadillo          | KLGEYPLQNVFLVAYTKKAPQLTSSSELMAFTRKMAAAAVACCQLREDKQLACGEGEADQI  |
| Sloth              | KLGEYQLQN-FLVAYAKKAPQLTFQELIAFTRKMAAAATCCQLGEDKQLSCGEEAADQI    |
| Opossum            | KLGEYHLQNVFLVAYTKKAPQLISQELISFTTKMAATASLCCQLSEDKQLACGEGAADLI   |
| Tasmanian devil    | KLGEYHLQNGFLVYTKKAPQLTAEELIGYTKKMAATASVCCQLSEDRQLACGESAADLI    |
| Wallaby            | KLGEYHLQN-----                                                 |

|                     |                                                               |
|---------------------|---------------------------------------------------------------|
| Human               | IGHLCIRHEMTPVNPVGQCCTSSYANRRPCFSSLVVDETYVPPAFSDDKFI FHKDLCQA  |
| Chimpanzee          | IGHLCIRHETTPVNPVGQCCTSSYANRRPCFSSLVVDETYVPPAFSDDKFI FHKDLCQA  |
| Bonobo              | IGHLCIRHEMTPVNPVGQCCTSSYANRRPCFSSLVVDETYVPPAFSDDKFI FHKDLCQA  |
| Gorilla             | IGHLCIRHEMTPVNPVGQCCTSSYANRRPCFSSLVVDETYVPPAFSDDKFI FHKDLCQA  |
| Orangutan           | IGHLCIRHETTPVNPVGQCCTSSYANRRPCFSSLVVDETYVPPAFSDDKFI FHKDLCQA  |
| Gibbon              | IGHLCIRHEMTPVNPVGQCCTSSYANRRPCFSSLVVDETYVPPAFSDDKFI FHKDLCQA  |
| Rhesus              | IGHLCIRHETTPVNPVGQCCTSSYANRRPCFSSLVVDETYVPPAFSDDKFI FHKDLCQA  |
| Crab eating macaque | IGHLCIRHETTPVNPVGQCCTSSYANRRPCFSSLVVDETYVPPAFSDDKFI FHKDLCQA  |
| Olive baboon        | IGHLCIRHETTPVNPVGQCCTSSYANRRPCFSSLVVDETYVPPAFSDDKFI FHKDLCQA  |
| Marmoset            | IGHLCIRHDTTPVNPVGQCCTSSYANRRPCFSSLVVDETYVPPAFSGDKFI FHKDLCQT  |
| Squirrel monkey     | LGHLCIRHETTPVNPVGQCCTSSYANRRPCFSSLVVDETYVPPAFSGDKFI FHKDLCQT  |
| Tarsier             | LGQLCIRHAATPVNPVGQCCTSSYANRRPCFSSLVVDETYVPPAFSADKFI FHKDLCQA  |
| Mouse lemur         | IGQLCIRHEATPVNPVGHCCTSSYANRRPCFSSLVVDETYVPPAFSDDKFI FHKDLCQA  |
| Bushbaby            | LGQLCIRHDTAAVNPVGAQCCAASYANRRPCFSSLVLDPTYIPPLFSADKFI FHKDLCQA |
| Chinese tree shrew  | IGQLCIRHETTPINPGIGQCCTSSYANRRPCFSSFLDPTYIPPLFSADKFI FHKDLCQA  |
| Squirrel            | IGHLCIRHEVNPVNPVGHCCNSSYANRRPCFSSLVVIDEYVPPAFSADKFI FHKDLCQP  |
| Golden hamster      | IGHLCIRHEAKPLNPGIGHCCNSSYANRRPCITSLVMDESYVPPAFSADKFTLNKDLCA   |
| Kangaroo rat        | IGQLCIRHAATPLNPGVGRCCSSYANRRPCFSSLVVDDTYVPPAFSDDKFI FHKDLCQA  |
| Mouse               | IGHLCIRNEASPVNSGIVHCCNSSYANRRPCITSLFRDETYVPPAFSADKFI FHKDLCQA |
| Rat                 | IGHLCIRHEANPVNSGIVHCCNSSYANRRPCITSLFRDETYVPPAFSADKFI FHKDLCQA |
| Naked mole rat      | IGQLCIRHDASPVNPVGVICCNSSYANRRPCFSSLVVDETYVPPAFSADKFI FHKDLCQA |
| Guinea pig          | IGQLCIRHEARPVNPVGVGRCCSSYANRRPCFSSLVVDETYVPPAFSADKFI FHKDLCQA |
| Rabbit              | LGQLCIRHEATPVNPVGQCCTSSYANRALCFNKLVLDDETYVPPAFSADKFI FHADLCQA |

Pika LGQLCIRHEATPLNPGVIGHCCTSSYANRALCFHKLVLDETYVPPPF SADKFV FHKDLCQA  
Pig IGQLCIRHEEMPINPGVGQCCTSSYANRRPCFSSLVLDDETYVPPPF SDDKFI FHKDLCQA  
Alpaca IGQLCIRHEETPVNPGVGQCCTSSYANRRPCFSSLVMDDETYVPPPF SDDKFI FHKDLCQA  
Bactrian camel IGQLCIRHEETPVNPGVGQCCTSSYANRRPCFSSLVMDDETYVPPPF SDDKFI FHKDLCQA  
Dolphin IGLLCIRHEETPVNPGVGQCCTSSYANRRPCFSSLVVDDETYVSPPF SDDKFI FHKDLCQA  
Cow IGHLICIRHEENPINPGVDQCCTSSYANRRPCFSSLVVDDETYVPPPF SDDKFI FHKDLCQV  
Horse IGQLCIRHEESPINPGVGQCCTSSYANRRPCFSSLVVDDETYVPPPF SDDKFI FHKDLCQA  
Cat IGQLCIRHEETPVNPGVGLCCTSSYANRRPCFSSLVVDDETYVPLPF SADRFI FHKDLCRA  
Dog IGQLCIRHEETPVNPGVGQCCTSSYANRRPCFSSLVVDDETYVSPPF SADKFI FHKDLCQA  
Ferret IGQLCIRHEETPVNPGVGQCCTSSYANRRPCFSSLVVDDETYVSPPF SADKFI FHKDLCQA  
Panda IGQLCIRHEETPVNPGVGQCCTSSYANRRPCFSSLVVDDETYVSPPF SADKFI FHKDLCQA  
Pacific walrus IGQLCIRHEETPVNPGVGQCCTSSYANRRPCFSSLVVDDETYVSPPF SADKFI FHKDLCQA  
Weddell seal IGQLCIRHEETPVNPGVGQCCTSSYANRRPCFSSLVVDDETYVSPPF SDDKFI FHKDLCQA  
Black flying fox IGQLCIRNEETPVNPSVGQCCTSSYASRRPCFSSLVVDDETYVPPPF SDDKFI FHKDLCQA  
Megabat IGQLCIRNEETPVNPSVGQCCTSSYASRRPCFSSLVVDDETYVPPPF SDDKFI FHKDLCQA  
Microbat IGQLCIRHGETPINAAGVQCCTSSYANRRPCFSSLVVDDETYVPPPF SDDKFI FHKDLCQA  
Hedgehog -GHLICIRHEETPINSVGQCCTSSYANRRPCFSSLVVDDETYVPPPF SADKFI FHKDLCQP  
Shrew IGHLICIRHEEAPINARVGHCCSSYANRRPCFSSLVMDDEAYVPPPF SADKFI FHTDLCQA  
Hyrax IGHLICIRHEETP-DAGVTRCCNYTYAIRRPCFSSLVVDDETYVPPA-SADKFL FHKDLCQA  
Elephant IGQLCIRHEETPVNPGVGHCCSSYANRRPCFSSLVVDDETYVPPAFSAKFL FHKDLCQA  
Cape golden mole IGQLCIRHEATPVNPGVGQCCTSSYANRRPCFSSLVLDDETYVPPPEFSAKFL FHKDLCQA  
Tenrec IGQLCIRHETSPVNPVGQCCTSSYANRRPCFSSLVVDDETYVPPPEFSAKFL FHKDLCQA  
Armadillo IGQLCIRHEATPVNPGVGRCCSSYANRRPCFSSLVVDDETYVPPAFSAKFL FHKDLCQA  
Sloth IGELCIRHEATPVNPGVGHCCSSYANRRPCFSSLVVDDETYVPPSAKFL FHKDLCQA  
Opossum IGQLCARHEAQPINDGVGHCCSSYANRRPCFSSLVVDDETYVPPSHDQFNFRQDLCHA  
Tasmanian devil IGQLCARHEAQPINDGVAHCCDFSYAHRPCFSSLVVDDETYVPPSYEQFKFQDLCQA  
Wallaby -----

Human QGVALQTMKQEFLINLVKQKPQITEEQLEAVIADFSGLLEKCCQGQEQEVCFAEEGKRLF  
Chimpanzee QGVALQTMKQEFLINLVKQKPQITEEQLEAVIADFSGLLEKCCQGQEQEVCFAEEGKLI  
Bonobo QGVALQTMKQEFLINLVKQKPQITEEQLEAVIADFSGLLEKCCQGQEQEVCFAEEGKLI  
Gorilla QGVALQTMKQEFLINLVKQKPQITEEQLEAVIADFSGLLEKCCQGQEQEVCFAEEGKLI  
Orangutan QGVALQTMKQEFLINLVKQKPQITEEQLEAVIADFSGLLEKCCQGQEQEVCFAEEGKLI  
Gibbon QGVALQTMKQEFLINLVKQKPQITEEQLEAVIADFSGLLEKCCQGQEQEVCFAEEGKLI  
Rhesus QGVALQTMKQEFLINLVKQKPQITEEQLEAVIADFSGLLEKCCQGQEQEVCFAEEGRRLF  
Crab eating macaque QGVALQTMKQEFLINLVKQKPQITEEQLEAVIADFSGLLEKCCQGQEQEVCFAEEGKLI  
Olive baboon QGVALQTMKQEFLINLVKQKPQITEEQLEAVIADFSGLLEKCCQGQEQEVCFAEEGKLI  
Marmoset EGLALHTMIQEFLINLVKQKPQITEEQLGAVTADFAGMLEKCCQGQEQEVCFAEEGQQLI  
Squirrel monkey EGLALHTMIQEFLINLVKQKPQITEEQLGTITADFAGMLEKCCRGQEREVCLAEEGQQLV  
Tarsier QGVALQTMKQEFLINLVKQKPQITEEQLEAVITDFSSLLEKCCQGQEQEVCFAE-GPKLI  
Mouse lemur QGVALQTMKQEFLINLVKQKPQITEEQLEAVIADFSGLLEKCCQGQEQEVCFAEEGKLI  
Bushbaby QGIALQTTKQEFLINLVKQKPQITEEQLEAVIADFSGLLEKCCQGQEQEVCFAEEGKLI  
Chinese tree shrew QGVALQTMKQEFLINLVKQKPQITEEQLGAVTADFSSLLEKCCQGQEQEVCFAEEGKLI  
Squirrel QGVALQTMKQEFLINLVKQKPQITEEQLEAVIADFSGLLEKCCQGQEQEVCFAEEGKLI  
Golden hamster QGRALQTMKQEFLINLVKQKPDMTEEQHEAVTADFSSFLEKCCQDQEQEDCFEEGPKLI  
Kangaroo rat QGRALQTMKQEFLINLVKQKPQITEEQLEAVIADFSGLLEKCCQGQEQEVCFAEEGPKLI  
Mouse QGKALQTMKQEFLINLVKQKPELTEEQLAAVTADFSSLLEKCCQDQEQEVCFAEEGPKLI  
Rat QGRALQTMKQEFLINLVKQKPEMTEEQHAAVTADFSSLLEKCCQDQEQEVCFAEEGPKLI  
Naked mole rat HGVALQEMKQEFLINLVKQKVQITEEQLEAVIADFSGLLEKCCQHHEQEQEVCFAEEGPKLI  
Guinea pig QGAALQEMKQEFLINLVKQKVQITEEQLEAVIADFSGLLEKCCQHHEQEQEVCFAEEGPKLI  
Rabbit QGIALQTMKQEFLINLVKQKPQITEEQLEAVIADFSGLLEKCCQHHEQEQEVCFAEEGPKLI  
Pika QGTALQTMKQEFLINLVKQKQITEEQLEAVIADFSGLLEKCCQHHEQEQEVCFAEEGPKLI  
Pig QGVALQTMKQEFLINLVKQKPQITEEQLEAVIADFSGLLEKCCQGQEQEVCFAEEGPALI  
Alpaca QGVALQTMKQEFLINLVKQKPQITEEQLEAVIADFSGLLEKCCQGQEQEVCFAEEGPALI  
Bactrian camel QGVALQTMKQEFLINLVKQKPQITEEQLEAVIADFSGLLEKCCQGQEQEVCFAEEGPALI  
Dolphin QGVALQTMKQEFLINLVKQKPQITEEQLEAVIADFSGLLEKCCQGQEQEVCFAEEGPALI  
Cow QGVPLQTMKQEFLINLVKQKPQITEEQLEAVIADFSGLLEKCCQGQEQEVCFAEEGPALI  
Horse QGVALQTMKQEFLINLVKQKPQITEEQLEAVIADFSGLLEKCCQGQEQEVCFAEEGPALI  
Cat QGVALQTMKQEFLINLVKQKPQITEEQLEAVIADFSGLLEKCCQGQEQEVCFAEEGPALI  
Dog QGVALQTMKQEFLINLVKQKPQITEEQLEAVIADFSGLLEKCCQGQEQEVCFAEEGPALI  
Ferret QGVALQTMKQEFLINLVKQKPQITEEQLEAVIADFSGLLEKCCQGQEQEVCFAEEGPALI  
Panda QGVALQTMKQEFLINLVKQKPQITEEQLEAVIADFSGLLEKCCQGQEQEVCFAEEGPALI  
Pacific walrus QGVALQRMKQEFLINLVKQKPQITEEQLEAVIADFSGLLEKCCQGQEQEVCFAEEGPALI  
Weddell seal QGVALQRMKQEFLINLVKQKPQITEEQLEAVIADFSGLLEKCCQGQEQEVCFAEEGPALI  
Black flying fox QGVALQTMKQEFLINLVKQKPQITEEQLEAVIADFSGLLEKCCQGQEQEVCFAEEGPALI  
Megabat QGVALQTMKQEFLINLVKQKPQITEEQLEAVIADFSGLLEKCCQGQEQEVCFAEE-----

|                  |                                                              |
|------------------|--------------------------------------------------------------|
| Microbat         | QGVALQTMKQOFLINLVKQKPOISEEQLEAVIADFSGLLEKCCQGQEQEVCFAEEGPKLI |
| Hedgehog         | QGVALQTMKQOFLINLVEQKPOITEEQLEAVTADFSALMDKCKGVEVHEACVTEEGPKLI |
| Shrew            | QGVALQTKKQOFLINLVKQKPOITEEQLEAVTADFSALLEKCCRSEKQDVCFAEEGPKLI |
| Hyrax            | QGVALQWMKQOFLINLV-----                                       |
| Elephant         | QGVALQSMKQOFLINLVKQKLOITEEQLEAVIADFSGLLETCCQGQEQEVCFAEEGPKLI |
| Cape golden mole | PGVALQTMKQOFLINLVKQKPOIREEQLEIVITDFCGLLEKCCQAQEQEDCFAKEGPKLI |
| Tenrec           | QGVALQMRKQOFLINLVKQKPOIREEQLEAVIADFCGLLETCCQAQDQDVCFAEEGPKLI |
| Armadillo        | QGVELQTRKQOFLINLVKQKLOITEEQLEAVTADFSGLLEKCCQDQEQEDCFAEEGPKLI |
| Sloth            | QGVALQMMKQOFLINLVKHKLOITEEQLEAAIADFSHLLKCCQSQEQEVCFAEEGHKLI  |
| Opossum          | QGEELOKQKQOFLINLVKQKPHITEEQLKAVTDFTGLENCCKGKQEQEACFAEEGPKLI  |
| Tasmanian devil  | QGEELOKQKQOFLINLVKQKPNITEEQLKAVIADFTGLENCCKGK-EEACFEEEGPKLI  |
| Wallaby          | -----I                                                       |

|                     |           |
|---------------------|-----------|
| Human               | SKTRAALGV |
| Chimpanzee          | SKTRAALGV |
| Bonobo              | SKTRAALGV |
| Gorilla             | SKTRTALGV |
| Orangutan           | SKTRAALGV |
| Gibbon              | SKTRAALGV |
| Rhesus              | SKTRAALGV |
| Crab eating macaque | SKTRAALGV |
| Olive baboon        | SKTRAALGV |
| Marmoset            | SKSRAALGV |
| Squirrel monkey     | SKTRAALEV |
| Tarsier             | SKTRAALRV |
| Mouse lemur         | SKTRAALGV |
| Bushbaby            | --TDLILSV |
| Chinese tree shrew  | SKTRAALGV |
| Squirrel            | SRTRAALGV |
| Golden hamster      | SRTRAALGV |
| Kangaroo rat        | SKTRAALGV |
| Mouse               | SKTRDALGV |
| Rat                 | SKTREALGV |
| Naked mole rat      | SKTRTSLGV |
| Guinea pig          | SKTRTSLGV |
| Rabbit              | SKTRAALEV |
| Pika                | SKTRAALGV |
| Pig                 | SKTRASLGV |
| Alpaca              | SKTRTALGV |
| Bactrian camel      | SKTRTALGV |
| Dolphin             | SKTRAALGV |
| Cow                 | SKTRAALGV |
| Horse               | SKTRAALGV |
| Cat                 | SKTRAALGV |
| Dog                 | SKTRAALGV |
| Ferret              | SKTRAALGV |
| Panda               | NSAEWIERI |
| Pacific walrus      | AKTRAALGV |
| Weddell seal        | AKTRAALGV |
| Black flying fox    | SKTRAALEV |
| Megabat             | -----     |
| Microbat            | SKTRAALGV |
| Hedgehog            | SKTRAALGV |
| Shrew               | SKTRAALGA |
| Hyrax               | -----     |
| Elephant            | SKTRAALGV |
| Cape golden mole    | SKTRAALGA |
| Tenrec              | AKTRAALGA |
| Armadillo           | SRTRAALGV |
| Sloth               | SKTRAALGV |
| Opossum             | AKTQEALGV |
| Tasmanian           | SKTQEAF-- |
| Wallaby             | AKTQALGA  |



# AFAMIN

Human MKLLKLTGFIFFLFFLTESLTLTPQPRDIENFNSTQKFIEDNIEYITIIAFAQYVQEATF  
 Chimpanzee MKLLKLTGFIFFLFFLTESLTLTPQPRDVENFNSTQKFIEDNIEYITIIAFAQYVQEATF  
 Bonobo MKLLKLTGFIFFLFFLTESLTLTPQPRDVENFNSTQKFIEDNIEYITIIAFAQYVQEATF  
 Gorilla MKLLKLTGFIFFLFFLPESLTLTPQPRDVENFNSTQKFIEENIEYITIIAFAQYVQEATF  
 Orangutan MKQLKLTGFIFFLFFLTESLTLTPQPDVFNSTQKFIEENIEYITIIAFAQYVQEATF  
 Gibbon MKQLKLTGFIFFLFFLTESLTLPIQPQDVDFNSTQKFIEENVEYITIIAFAQYVQEATF  
 Rhesus -----TGFIFFLCFLTESLTLTPQPDVDFNSTQKFIEENLEIYITIIAFAQYVQEATF  
 Crab-eating macaque MKQLKFTGFIFFLCFLTESLTLTPQPDVDFNSTQKFIEENLEIYITIIAFAQYVQEATF  
 Olive baboon MKQLKLTGFIFFLCFLTESLTLTPQPDVDFNSTQKFIEENLEIYITIIAFAQYVQEATF  
 Marmoset MKQLKLTGFIFYLFFLTESLMLPTELQDLDFNITQKFIEENVEYITIIAFAQYVQEATF  
 Squirrel monkey MKQLKLTGFIFFLFFFTESLMLPTELQDLDFNITQKFIEENVEYITIIAFAQYVQEATF  
 Tarsier MKQLKLTGFVFFLFFVTESLTLPAKPDVDYFTSTQKYIEENVEYITIIAFAQYVQEATF  
 Mouse lemur -----TQKFIEENIEYITIIAFAQYVQEATF  
 Bushbaby MKHFKLSGFIFFLFFFTESLTLTPKPEDVDDFEITQKFVEDNI-----  
 Chinese tree shrew MKQLELTSFVLFLLFFLTESLPLTPKPDADDFSVIQKFIEENVEYITTIMFSQYIQEAVAF  
 Squirrel MKQLKFSGFIFLLFFLTESLTLTETQDVSFGITQKFIEENTGSITIIAFAQYVQEATF  
 Golden hamster MKHIKFIGFIFFLFSLTESLALPTKPDIDPFLDTHKFIEENTAYLTIIVAQYVQEVSF  
 Kangaroo rat MKQFKLTAFIFSLFFWTESLALPINPWDIDDFSTQKFIEENIGSLVIITFAQYVQEATF  
 Mouse MRHLKLTGFIFLLPLTESLALPTKPDVDHFNATQKFIDENTTYLAI IAFS QYVQEASF  
 Rat MRHLKLTGFIFLLSLTESLALPTKPDVDHFNATQKFINENVAYLTI IASAQYVQEASF  
 Naked mole rat MQQLKLTGFFLVSFLIDSLTLTPQPDIGNFNVNQKFIEENITPFTIIAFSRYVQEATF  
 Guinea pig MQQLKFTGFIFFLFILIESTLTLTQLOEVDNFNVTQKFIENTASMTIIAFAQYVQEATF  
 Rabbit MKQLNLGIVFFSFLIASLTLTPKPDVDDFSVTQKFIEENAGYITIIAFAQYVQEATF  
 Pika MRQLNLTDVFFFLFSLTESLTLTPKPDVDDSSVTQNFIDENTGYLTIIEFAQYVQEATF  
 Pig MKQLKLTGFVIFFFLFFLTESLTLTPKPDIDDVRIKKFIEDNVVYITIIAFAQYVQEASF  
 Alpaca MKQLKLTGFVIFFFLFFLTESLTLTPKPDVENSNSTQNFLEYVYVLF-TIIAFAQYVQEASF  
 Bactrian camel MKQLKLTGFVIFFFLFFLTESLTLTPKPDVDDVSVTKKFIEENVEYITIIAFAQYVQEASF  
 Dolphin MKQLKLTGF-LFFFFLTESLTLTPKPDVDDVSIQKFIEDNIGYITIIAFAQYVQEASF  
 Killer whale MKQLKLTGF-LFFFFLTESLTLTPKPDVDDVSIQKFIEDNIGYITIIAFAQYVQEASF  
 Cow MKQLKLTGFVIFFFLFFLTESLTLTPQPDVDDVRIQKFIEDNIGYITIIAFAQYVQEASF  
 Sheep MKQLKLTGFVIFFFLFFLTESLTLTPQPDVDDVRIQKFIEDNVGYITIIAFAQYVQEASF  
 Goat MKQLKLTGFVIFFFLFFLTESLTLTPQPDVDDVRIQKFIEDNVGYITIIAFAQYVQEASF  
 Horse MKQLTLTGFVIFLFFLFFLTESLTLTKLQDVDDASITQKFIEENIGYITIIAFAQYVQEASF  
 White rhinoceros MKQLKLIGFVIFLFFLFFLTESLTLTKLQDVDDASITQKFIEKNIGYITIIAFS QYVQEASF  
 Cat MKQLKLTGFVIFLFFLFFLTESLTLTKPDVDDVSIQKFIEENVEYITIIIFAQYVQEASF  
 Dog MKQLKLTGFVIFLFFVPESLTLTPQPDVDDVSIQKFIEENVEYITIIIVFAQYVQEASF  
 Ferret MKQLKLTGFVIFLFFVPESLTLTPQPDVDDVSIQKFIEENVEYITIIIVFAQYVQEASF  
 Panda MKQLKLTGFVIFLFFVPESLTLTPQPDVDDVNIQKFIEENVEYITIIIVFAQYVQEASF  
 Pacific walrus MKQLKLTGFVIFLFCVPESLTLTPQPDVDDVSIQKFIEENVEYITIIAFAQYVQEVSF  
 Weddell seal MKQLKLTGFVIFLFFVPESLTLTPQPDVDDVSIQKFIEENVEYITIIAFAQYVQEVSF  
 Megabat -----DFRITQKFIEENVEYITIIAFAQYVQEASF  
 Microbat MKQLKLTGFVIFLFFLFFLTESLTLTKPDVDDFNIQKFIEDNVGYITIIITFAQYVQEASF  
 Elephant -----  
 Hyrax MK-LKLAGFV-FLFFWTETLALLIQPPDV-----  
 Tenrec MEWFKLAGFVICLLFLSESLTLTPNPQADHLKTTQTFIQDNTEYITIIAFAQYVQEATF  
 Opossum MKSIRTFGPVFLFFYLAESLTLPRAPQTKDYLNATQKFLENNIRDVTVAFAQYVQEATY  
 Tasmanian devil MKSIKSIGAVILFFSLAESVTLPEVPOQED-RNATQKFLENNIRDVTVAFAQYVQEATY  
 Wallaby MSQ---IGPVILFFLVESLTLPAKPDQEDYLNVTQKFLENNIRDV-----  
 Platypus -----QEASY

Human EEMEKLVKDMVEYKDRCMADKTLPECSKLPNNVLQEKICAMEGLPQKHNFSHCCSKVDAQ  
 Chimpanzee EEMEKLVKDMVEYKDRCMADKTLPECSKLPNNVLQEKICAMEGLPQKHNFSHCCSKVDAQ  
 Bonobo EEMEKLVKDMVEYKDRCMADKTLPECSKLPNNVLQEKICAMEGLPQKHNFSHCCSKVDAQ  
 Gorilla EEMEKLVKDMVEYKDRCMADKTLPECSKLPNNVLQEKICAMEGLPQKHNFSHCCSKVDAQ  
 Orangutan EEMEKLVKDMVEYKDRCMADKTLPECSKLPNNVLQDKICAMEGLSQKHNFSHCCSKVDSQ  
 Gibbon EEMEDLVKDMVEYKDRCMADKTLPECSKLPNNVLQEKICAMEGLPQKHNFSHCCSKVDDE  
 Rhesus EEMEKLVKDMVEYKDRCMADKTLPECSKLPNNFLQEKMCAMEGLPQKHNFSHCCSKVGAE  
 Crab-eating macaque EEMEKLVKDMVEYKDRCMADKTLPECSKLPNNFLQEKMCAMEGLPQKHNFSHCCSKVGAE  
 Olive baboon EEMEKLVKDMVDYKDGCMADKTLPECSKLP-----  
 Marmoset EEMEKLVKDMVEYKDSMANSMLPKCSKLPNDVLQEAICAMEGLPQKHNFSHCCSKADAE  
 Squirrel monkey EEMEKLVKDMVEYKDSMANSMLPKCSKLPNDVLQEAICAMEGLPQKHNFSHCCSKADTE  
 Tarsier EEMEMLTKDMKEYRDRCLADRTLPECAKLVNNVLQERFCAMEGLPQKHNFSHCCSKADFE  
 Mouse lemur EDVEILVKDMVEYKDRCVANKTLPECFKLP-----

Bushbaby -----NDVLQEKICAMKGLPQKYNFSSHCCGN-DFE  
Chinese tree shrew EELQVMINNMVEYRDKCVADRTLPECSKSANEIFQEKTCMEGLPQKYNFSSHCCSKVD FE  
Squirrel DEMEILVKDIEYRDCLAHRTLPECAEIAINVLOGKICSIIEGLPQKYNFSSHCCSKMGLE  
Golden hamster DEVEMLVKVMMDYRDCLANRTLPECSKIANKVIQDMICATEGLPQKHNFSHCCSKTDF A  
Kangaroo rat DELEMLVKVNI--KERCLTNLRLPECSEIAKTAL-EITCAGEGSPQKYNFSQCCSKVDV E  
Mouse DEVETLVKVMLDYRDRCWADNTLPECSKTANDAIQDMLCDMEGLPQKHNFSHCCGKAGFP  
Rat EEVEMLVKVMLDYKDRCLADSTLPECSKIANDAIQDMLCDMKGLPQKHNFSHCCRQAGFQ  
Naked mole rat DDMEILIKDVMKYKDKCLANKTLLECSKPANNVLQDMICSVIEGLPQKHNFSHCCSKVD FE  
Guinea pig DDMEMLIKDMMKYKDKCLGDKTLPECSKLANNVLQEMMSMEGLPQKYNFSSHCCRKVD FK  
Rabbit EEVQMLMKDMLEYKDKCLADKTLPECAETANNILQEKICAMEGLSQRHNFSHCCSKVD FE  
Pika EEVERLMDMLEHRRKCMADKTLSECSSETNNILQEKMCAMEGLPQRYNFSHCCSKVD FE  
Pig EEVEMLVKAMKEYRDRCLADMTLPECSKLANDVLLENICAMEGLPQKYNFSHCCCHKVD FE  
Alpaca EEVEMLAKAMTEYRDKCLADRTLPECSKLANDVLLENICAMEGLPQKHNFLHCCRKIDV E  
Bactrian camel EEVEMLAKAMTEYRDKCLADRTLPECSKLANDVLLENICAMEGLPQKHNFLHCCRKIDV E  
Dolphin EEVEMLVKAMTEYRDKCLADMTLPECSKLANDVLLENICTMEGLPQKHNFSHCCCHKAD FE  
Killer whale EEVEMLVKAMTEYRDKCLADMTLPECSKLANDVLLENICTMEGLPQKHNFSHCCCHKAD FE  
Cow EEVEMLVKAMTEYRDKCLADRTLPECSKLANEVLLENICAMEGLPQKYNFSHCCCHKVD FE  
Sheep EEVEMLVKTMAEYRDKCLADRTREPCSCLTNEVLLENICAMEGLPQKYNFSHCCRKVD FE  
Goat EEVEMLVKTMAEYRDKCLADRTREPCSCLTNEVLLENICAMEGLPQKYNFSHCCRKVD FE  
Horse EEVDRLVKIMTKYKGQCSGEVTLPCPRLTNDILLEKTCVAVKGLPQKYNFSHCCSMVD LE  
White rhinoceros EEVEILVKIMTKYGEQCLDEV TIPDCPRLTNDILLERTCAVKGGLPQKYNFSHCCSMVD LE  
Cat EEVEMLVKTMTTEYRDKCLADMTLPECSKLANDVLLENICALEGLPQKHNFSHCCSKVD LE  
Dog EEVEMLVKAMTEYRDKCLVDMTLPVCSKLANDVLLENICALEGLPQKHNFSHCCSKVD LE  
Ferret EEVEVLVNAMKEYRDKCLGDVTLMLCSKSANDVLLENICALEGLPQKHNFSHCCSKVD LE  
Panda EEVEVLVKAMTEYRDKCLGDVTLVPCSKLATDVLLENICALEGLPQKHNFSHCCSKVD LE  
Pacific walrus EEVEVLVKAMTEYRDKCLGDVTLPMCYKLANDVLLENICALEGLPQKHNFSHCCSKVD LE  
Weddell seal EEVEVLVKAMTEYRDKCLGGMTLPMCSKLANDVLLENICALEGLPQKHNFLHCCGKVD LE  
Megabat EEAEMLRKAMTEYKDQCLANMTLPMCSKLPNDVLQEMICAIEGLPQKHNFSHCCNKVD FE  
Microbat EEVEMLAKTMTEYRDQCLANSKLPQCSKLPNDALQEAICAMEGVPQKHNFSYCCNKGG FE  
Elephant -----  
Hyrax -----  
Tenrec EEVEMFAKEMMALKDKCVADMALPECSGLPNDILOKSI CAVEGLPQKYNFSSHCCA KSDLE  
Opossum EEITGLVKQMILYRDKCVADMQQPECSELAIYVMQDKICRVKELSDKYGLSECCTKNSTN  
Tasmanian devil EEITELVKQMIHYIDKCMANMELPECSRLANDVIQDKICEVKELSEKYGFSECCTEDISK  
Wallaby -----  
Platypus EDISKMVENLVALKNRCTAQEKLPECSKTEVGESEDEMAGKELSEKYGYADCCSQDEKN

Human RRLCFFYNKKSVDVGLPPFPPTLDPEEKQAYESNRESLLNHFLYEVARRNPFV FAPTLT L  
Chimpanzee RRHCFYFNKKSVDVGLPPFPPTLDPEEKQAYESNRESLLNHFLYEVARRNPFV FAPTLT L  
Bonobo RRHCFYFNKKSVDVGLPPFPPTLDPEEKQAYESNRESLLNHFLYEVARRNPFV FAPTLT L  
Gorilla RRLCFFYNKKSVDVGLPPFPPTLDPEEKQAYESNRESLLNHFLYEVARRNPFV FAPTLT L  
Orangutan RRLCFFYNKKA DVGFLPPFPPTLDPEEKQAYESNRESLLNHFLYEVARRNPFV FAPTLT L  
Gibbon RRLCFFYNKKA DVRFLLPPFPPTLDPEEKQAYESNRESLLNHFLYEVARRNPFV FAPTLT L  
Rhesus RRLCFFYNKKA DVGFLPPFPPTLDPEEKQSYESNRESLLNHFLYEVARRNPFV FAPTLT L  
Crab-eating macaque RRLCFFYNKKA DVGFLPPFPPTLDPEEKQSYESNRESLLNHFLYEVARRNPFV FAPTLT L  
Olive baboon -----  
Marmoset RRICFFYNKKANVGFLPPFPPTLDPEEKQAFKNNKESFLNHVYEVARRNPFV FAPTLT L  
Squirrel monkey RRLCFLYNKKANVGFLPPFPPTLDPEEKQAFKNNKESFLNHVYEVARRNPFV FAPTLT L  
Tarsier RRLCFFFNKKA DVVEFLPPFPPTWDPEEKQAYKNNRESFLNHMYEVARRYPFV FAPTLT L  
Mouse lemur -----  
Bushbaby RRSCFFLNKKG VGLPPFPPTLDPEEKQAFKKSSESFLNHVYEVARRNPFV FAPTLT L  
Chinese tree shrew RRLCFFYNKKG DGEFQSPFPPTLDPEEKQAYQNVKPYL-----  
Squirrel RRLCFLYNKKA DVGFLPPFPPTLDPEEKQAYKNNRESFLNRYTHEVARRNPFV FAPTLT L  
Golden hamster RRLCFFYNKKA KTGFLPPFPPTLDPEEKQAYKNNNGSFLNLYMYEVARRNPFV FAPTLT L  
Kangaroo rat RR--FLYKKSSTVGLPPFPPTLDPEEKQAYKNDRESFINCYSHELATRNPFV FASILLM  
Mouse RRLCFFYNKKANVGFLPPFPPTLDPEEKQAYKNNSESFLHLYMYEVARRNPFV FAPVLLA  
Rat RRLCFFYNKKANVGFLPPFPPTLDPEEKQAYKNNSESFLNLYMYEVARRNPFV FAPVLLN  
Naked mole rat RRHCFYFNKKA DVGFLPPFPPTLDPEEKQAYKNNRESFLNQCMEYEVARRNPFV FAPTLT L  
Guinea pig RRLCFFYNKKANVGFLPPFPPTLDPEEKQAYKNNRESFLNQCMEYEVARRNPFV FAPTLT L  
Rabbit RRLCFFYNKKA DVGFLPPFLPTLDPEEKQAYKNSRDSFLNHYIYEVARRNPFV FAPTLT L  
Pika RRLCFFYNKKA DVGFLPPFLPTLDPEEKQAYKNNRESFLNHYIYEFARRNPFV FAPTLT L  
Pig RRLCFLHNKKA EVGFLPPFLPTLDPEEKQTYKTNKESFLNHYIYEVARRNPFV FAPTLT L  
Alpaca RRLCFLHNKKA DVGFLPPFLPTLDPEEKQTFKNNRESFLNHYIYEVARRNPFV FAPTLT L  
Bactrian camel RRLCFLHNKKA DVGFLPPFLPTLDPEEKQTFKNNRESFLNHYIYEVARRNPFV FAPTLT L  
Dolphin RKHCFYFNKKA DVGFLPPFLPTLDPEEKQTYKNNRESFLNHYIYEVARRNPFV FAPTLT L

Killer whale RKHCFLHNKKADVGLPPLPTLDPEEKQOTYKNNRESFLNNYIYEVSRNPFFVAPLLT  
Cow RRLCFFHNKKADIGLLPPLPTLDPEEKQOTYKNNRESFLNNYVYEVSRNPFFVAPLLT  
Sheep RRLCFFHNKKADIGFLPPLPTLDPEEKQOTYKNNRESFLNNYIYEVSRNPFFVAPLLT  
Goat RRLCFFHNKKADIGFLPPLPTLDPEEKQOTYKNNRESFLNNYIYEVSRNPFFVAPLLT  
Horse RERCFFHNKSDVGLPPLPTLDLEEKQOTYKNNRESFLNNCIYEVSRNPFFVAPLLT  
White rhinoceros RERCFFHNKSDIGFLPPLPTLDLEEKCLTYKNNRESFLNN-----  
Cat KKLCFFHHKKADVGLPPLPTLDPEEKQOTYKNNRESFLNNYIYEVSRNPFFVAPLLT  
Dog RKLCCFFHNKKADAGFLPPLPTLDPEEKQOTYKSNRESFLNNYIYEVSRNPFFVAPLLT  
Ferret RKLCCFFHNKKADVGLPPLPTLDPEEKQOTYKNNRESFLNNYVYEVSRNPFFVAPLLT  
Panda RKLCCFLHNKKTVDVGLPPLPTLDPEEKQOTYKNNRESFLNNYIYEIARRNPFFVAPLLT  
Pacific walrus RKLCCFFHNKKADVGLPPLPTLDPEEKQOTYKNNRESFLNNYIYEVSRNPFFVAPLLT  
Weddell seal RKLCCFFHNKKADVGLPPLPTLDPEEKQOTYKNNRESFLNNYIYEVSRNPFFVAPLLT  
Megabat RRLCFFRNKKAGVEFLPSPLPTLDPEEKQAYKNNSESFLNNYIYEVSRNPFFVAPLLM  
Microbat RRLCFFRNKKADVGLPPLPTLDPEVKCQAYKNNSESFLSNYIYEVSRNPFFVFTPTLLT  
Elephant -----  
Hyrax -----  
Tenrec RRGCFYLNKKADVGLPPLPMADAEEKKQOYKQKDLFLKYLVEVARRNPFFVFTLLS  
Opossum RLPCCFFQRKSADASFLTPFQGPDEKACQOYEAEDPEAFLNHFIEIARQNPFFGAPLLS  
Tasmanian devil SRLCFFERKRTDVSFLTPFQIPDPEKGCQOYEADQETFLNHYIYEIARRNPFFIFAPLLA  
Wallaby -----YVYEIARQNPFFLAPLLS  
Platypus RHRCFFLRKRVDLGFLLHYD-LKPEEECKAYKDDPEAVWNQYIYEIARRQPFVLYTPTLLF

Human VAVHFEEVAKSCCEEQNKVNCLQTRAIPTVQYLKAFSSYQKHVCGALLKFGTKVVFHYI  
Chimpanzee VAAHFEEVAKSCCEEQNKVDFQTRAIPTVQYLKAFSSYQKHVCGALLKFGTKVVFHYI  
Bonobo VAAHFEEVAKSCCEEQNKVDFQTRAIPTVQYLKAFSSYQKHVCGALLKFGTKVVFHYI  
Gorilla VAAHFEEVAKSCCEEQNKVDFQTRAIPTVQYLKAFSSYQKHVCGALLKFGTKVVFHYI  
Orangutan VAAHFEEVAKSCCEEQNKVDFQTRAIPTVQYLKAFSSYQKHVCGALLKFGTKVVFHYI  
Gibbon VVAHFEEVAKTCCCEEQNKVDFQTRAIPTVQYLKAFSSYQKHVCGALLKFGTKVVFHYI  
Rhesus VAAHFEEVAKSCCEEQNKVDFQTRAIPTVQYLKAFSSYQKHVCGALLKFGTKVVFHYI  
Crab-eating macaque VAAHFEEVAKSCCEEQNKVDFQTRAIPTVQYLKAFSSYQKHVCGALLKFGTKVVFHYI  
Olive baboon -----AIPVIQYLKAFSSYQKHVCGALLKFGTKVVFHYI  
Marmoset VAAHFEDVATSCCEEQNKVDFQTRAVPVMQYLKAFSSYQNNVCGTLLKFGTKIINSINI  
Squirrel monkey VAAHFGDVTSCCEEQNKVDFQTRAVPVMQYLKAFSSYQNNVCGVLLKFGTKIINSINI  
Tarsier VATRFEEVAKPCCCEEQYRVDFQTRVAPVTQYLKTVSSYSKNVCGAYFKFGPKVLNSINV  
Mouse lemur -----TRAAPVIQYLKAFSSYQKNVCGAYLKFGTKVLNFINI  
Bushbaby AATRFAEAAGACCEDQREVGCQKRAAPIMQYLRAFSSYQKNVCGALLKFGPEGLNSINI  
Chinese tree shrew -----AAPITRYLKASSYQKTLCGAYMKFGPKILKINSINV  
Squirrel VAARFEEVAKTCCCEEQKANCFOAKAAPITQYLKAMSSYQKTVCGAFLKFGPKVLNSINI  
Golden hamster VAARFEEAATTCCEEQKATCFQAKVVPITQYLKASSYQGTVCGALMKFGPKVLNSINT  
Kangaroo rat AAASFEEELAKRCGEQO-KDNCFQTNV-----NI  
Mouse VAAWFEEAATTCCEEQKATCFQAKAAPITQYLKASSYQKNVCGALIKFGPKVLNSINV  
Rat VAARFEEAATTCCEEQKATCFQAKAAPITQYLKALSSYQKNVCGALLKFGPKTLNSINI  
Naked mole rat VAARFEEVVKTCCEAEHQKANCFOAMATPVTQYLKAFSSYQKNVCGALMKFGPKVLNSINI  
Guinea pig VAARFEEVAKTCCCEEQKANCFOEKATPITQYLKAFSSYQKNVCGALMKFGPKVLNSINI  
Rabbit VAAQFEELTNRCCCEEQHKASCFGVRAAPVTQYLKAMSSYQKNVCGAFLKFGSNVLSMNI  
Pika VAARFEEVSTCCCEEQHKASCFGVRAAPVTQYLKALSSYQKNVCGAFMKFGPQVLNSINI  
Pig VAARFEEAETCCCEEQKANCFRSKAEPFIQYLKALSSYQKNVCGALLKFGPQILQINSINI  
Alpaca VAARFEEMTKTCCEEQEKAYCFRTKAEHFIQYLKALSSYQKNVCGALMKFGPQILQINSINT  
Bactrian camel VAARFEEMTKTCCEEQEKAYCFRTKAEHFIQYLKALSSYQKNVCGALMKFGPQILQINSINT  
Dolphin AARFEEMTKTCCEEQEKANCFRTKAETFIQYLKALSSYQKNVCGALMKFGPQILKINSINI  
Killer whale AARFEEMTKTCCEEQEKANCFRTKAETFIQYLKALSSYQKNVCGALMKFGPQILKINSINI  
Cow VAARFEEMTKTCCEEQEKANCFRTKAEPFIYLLKALSSYQKNACRALMKFGPQILQINSINI  
Sheep VAARFEEMTKTCCEEQEKANCFRTKAEPFIYLLKALSSYQKNVCGALMKFGPQILQINSINI  
Goat VAARFEEMTKTCCEEQEKANCFRTKAEPFIYLLKALSSYQKNVCGALMKFGPQILQINSINI  
Horse VATRFEEMAKTCCEEQDKANCFRTKAEPVIQYLKALSSYQKNVCGALVKFGPQVLKINSINI  
White rhinoceros -----AESVIQYLKALSSYQKNVCGALMKFGLQVLKINSINL  
Cat VAARFEEMTKTCCEEQDKANCFRTKAEPVIQYLKASSFQKNVCGALIKFGLQVLESINV  
Dog VAARFEEMTKTCCEEQDKANCFRTKAELVIQYLKASSFQKNVCGALMKFGLQVLESINV  
Ferret VAARFEEMTKTCCEAQDKANCFRTKAEPVIQYLKASSFQKNVCGAFMKFGPQVLGLINV  
Panda VAARFEEMTKTCCEEQDKANCFRTKAEPVIQYLKASSFQKNVCGALMKFGLQVLESINV  
Pacific walrus VVARFEEMTKTCCEEQDKANCFRTKAEPVIRYLKASSFQKNVCGALMKFGLQVLESINV  
Weddell seal VVARFEEMTKTCCEEQDKANCFRTKAEPVIQYLKASSFQKNVCGALMKFGLQVLESINI  
Megabat LAARFEEVITKTCCEEQDKANCFRTKAKSVIQFLKALSSYQKNVCGAFLKFGQVLNSINI  
Microbat VMGLIEEMAKTCCEEQDKANCFRKAVPVIQYLKAFSSFQKNVCGAFLRFGPTVLKSIYI  
Elephant -----YI

Hyrax -----YI  
 Tenrec VATRFEDVAKTCCEEEEDKASCFO TKASPVIKYLKENS AFEKTL CGASMRFGPRIITLINA  
 Opossum GAAIYKEAITRCCQEENKHECFHLKVTPITNGLKERSASQKNTCGVLMKYGPKVLKHLKLV  
 Tasmanian devil LVARYKEVSTSCCQEENKHECFRIKATPITNDLKEISAKQONICGVLKRGKFGPKGVK  
 Wallaby LAACYKEVSTSCCQEENKHECFH-TATTITNNLKELSAKQ-NLCGVLMHFGPKGVKHLHA  
 Platypus HAQEYKVVQACCSEENKLCQFQTKGTLVTNDLRWIHEIHKHLCRIAMGFGKRALRSGKV

Human AILSQKFPKIEFKELISLVEDVSSNYDGCCEGDVVQCIRDTSKVMNHICSKQDSISSKIK  
 Chimpanzee VILSQKFPKIEFKELISLVEDVSSNYDGCCEGDVVQCIRDTSKVMNHICSKQDSISSKIK  
 Bonobo AILSQKFPKIEFKELISLVEDVSSNYDGCCEGDVVQCIRDTSKVMNHICSKQDSISSKIK  
 Gorilla AILSQKFPKIEFKELISLVEDVSSNYDGCCEGDVVQCIRDTSKVMNHICSKQDSISSKIK  
 Orangutan AVLSQKFPKIEFKELISLVEDVSSNYDGCCEGDVVQCIRDTSKVMNHICSKQDSISSKIK  
 Gibbon AVLSQKFPKIEFKELISLVEDVSSNYDGCCEGDVVQCIRDTSKVMNHICSKQDSISSKIK  
 Rhesus AVLSQKFPKIEFKELISLVEDISSNYEGCCEGDVVQCIRDTSQVA-----  
 Crab-eating macaque AVLSQKFPKIEFKELISLVEDISSNYEGCCEGDVVQCIRDTSKVMNHICSKQDSISSKIK  
 Olive baboon AVLSQKFPKIEFKELISLVEDISSNYEGCCEGDVVQCIRDTSKVMNHICSKQDSISSKIK  
 Marmoset AILSQKFPKIEFEELISLIEDVSSNYDECCEGDVVHCIRHMSKIMNHICSKQDAFSSKIK  
 Squirrel monkey AILSQKFPKIEFKELISLIEDVSSTYDECCEGDVVHCIRHMSKIMNHICSKQDAVSSKIK  
 Tarsier ATLSQSLPKMNFKDLTSLVEVSSIYDGCCEGDVVQCIRD MNKFM SHLCSKPVSNSSKIK  
 Mouse lemur AVLSQKFPKIEFKELTSLIEDVSSKYDGCCEGDVVQCVRDTSKVMNHICSKQGSISSKIQ  
 Bushbaby AVLSQKFPKVEFQELTSLLEDVSSFYDACCEGDVVGCIRSSSKVASRICSKQESISSKIK  
 Chinese tree shrew AVFSQKFPKIEFKELLSLIEEISSKYDGCCEGDVAVQIRDSAKVMNHICSKQDSISTKIK  
 Squirrel AVFSKFPKIEFKELTSLLEDVSSMYDGCCEGDVLCIRYQSQVM SHICSKQESISSKIK  
 Golden hamster AVFSKFPKIGFQNLTSLLEDVSTMYDVCCEGDVVQCIRSQ-----  
 Kangaroo rat VVLGRKFPKRKFHELTSLLKDVLSMYDGCCLGDFVNCIHAQNQVYRYICSEQDSISSKIK  
 Mouse AVFSKFPKIGFKDLTTLLEDVSSMYEGCCEGDVVHCIRSQSQVNHICSKQDSISSKIK  
 Rat AVFSKFPKIGFEDLTSLLEDVSSMYDGCCEGDVVQCIRSQSQVMHHCISKQDSISSKIK  
 Naked mole rat AVFSKFPKIEFKELTSLLEQVSSMYDGCCEGDALQCIHDQSKVMRHIFSKQDSISSKIK  
 Guinea pig AVFSKFPKIEFKELTSLLEDVSSMYGCEGDVLCIHDQSKVM SHICSKQDSISSKIK  
 Rabbit AVLSQKFPKIGFKELTSLLEDVSSTYDGCCEGDVVHCITYGMGKIM SHICSKQDSISSKIK  
 Pika AILSQKFPKIGFKELTSLLEDVSSKYDGCCKGDVIHC IHGMDKV SHICSKQDSISSKIK  
 Pig AVLSQKFPKIEFKELTSLLEDISSKYDGCCEGDVVHCIRGRSKVM SHICSKQDSISSKIK  
 Alpaca AVLSQKFPKIEFKELTSLLEDVSSKYDGCCEGDVVECIHGRSKIM SHICSKQDSISSKIK  
 Bactrian camel AVLSQKFPKIEFKELTSLLEDVSSKYDGCCEGDVVECIHGRSKIM SHICSKQDSISSKIK  
 Dolphin AVLSQKFPKIEFKELISLLEDVSSKYDGCCEGDVVQCIHGRSKVM SHICSKQDSISSKIK  
 Killer whale AVLSQKFPKIEFKELISLLEDVSSKYDGCCEGDVVQCIHGRSKVM SHICSKQDSISSKIK  
 Cow AILSQKFPKIGFKQLTSLLEDVSSKYDGCCEGDVVQCIRGRSKVM SHICSKQDSISSKIK  
 Sheep AILSQKFPKIGFKQLTSLLEDVSSKYDGCCEGDVVQCIHGRSKVM SHICSKQDSISSKIK  
 Goat AILSQKFPKIGFKQLTSLLEDVSSKYDGCCEGDVVQCIRGRSKVM SHICSKQDSISSKIK  
 Horse AILSQKFPKIEFKELTSLLEDVSSKYEGCCEGDAVKCIRRRSKIM SHICSKQDSISSKIK  
 White rhinoceros AILSQKFPKIEFKELTSLLEDISSKYEACCEGDVQCIHGRSKVM SHICSKQDAISSKIK  
 Cat AILSQKFPKIEFKELTSLLEDVSSKYDGCCEGDVQCIHGRSKVM SHICLQDSISSKIQ  
 Dog AILSQKFPKIEFKELTSLLEDVSSKYNGCCEGDAVQCIHGRSKVM NHICSKQDSISSKIR  
 Ferret AILSQKFPKIEFKELISLLEDVSSNYHGCEGDVQCIHGRSKVLSHICSKQDSISSKIK  
 Panda AILSQKFPKIEFKELTSLLEDVSSKYDGCCEGDVQCIHGRSKVM SHICSKQDSISSKIK  
 Pacific walrus AILSQKFPKIEFKELTSLLEDVSSKYDGCCEGDAMQCIHGRSKVM SHICSKQDSISSKIK  
 Weddell seal AILSQKFPKIEFKELTSLLEDVSSKYDGCCEGDVQCIHGRSKVM SHICSKQDSISSKIK  
 Megabat AILSQKFPKIEFKELTSLLEDVSSKFNCGCEGDAVHCIRGWSKVM DHICSKQDSISSKIK  
 Microbat AIFSQKFPKTEFEELTSLIEDVSSKYDGCCEGDVQCIHGRSKVLSHICSKQDSISSKIK  
 Elephant AVLSRKFPEIEF-EFISLLEDVASKYDGCCEGDTVECIQAMNNVM SHICTKQDPISSKVK  
 Hyrax ARFRQDMP-TEFKK--PLLADISSKFDGCPKGD-VHCV-VTSKIVSHICTKQDSISSKIK  
 Tenrec AIIIGQKFPKIEFKELTSTVKHISSTDGCCEGDVQCIHGRSMVNHICTNQDSISTKVK  
 Opossum VEFQKFPKIDFKDLGILLENMDHLFDECCEGDVVQCFRNEAKILNYICSKPDSISSKII  
 Tasmanian devil VEISQKFPKIDFSLNKLLEDIPNMV DGCCEGDVVHCFRLEAKIINHICSRPDSLSSKIR  
 Wallaby VEISQKFPKIP-KELDILPKDIPIMIDGCWEGDVVYCLHSAKAKITNYLCSKPDSSISSKIR  
 Platypus LYFSQQFPKMELATLLNVM PDLLEGDGCCEGDVIECFRSRAELVSSMCSNQKAISSQFS

Human ECCEKKIPERGQCI INSNKDDRPKDL SLREGKFTDSENVQERDADPDTFFAKFTFEYSR  
 Chimpanzee ECCEKKIPERGQCI INSNKDDRPKDL SLREGKFTDSENVQERDADPDTFFAKFTFEYSR  
 Bonobo ECCEKKILERGQCI INSNKDDRPKDL SLREGKFTDSENVQERDADPDTFFAKFTFEYSR  
 Gorilla ECCEKKILERGQCI INSNKDDRPKDL SLREGKFTDSENVQERDADPDTFFAKFTFEYSR  
 Orangutan ECCEKKIPERGQCI INSNKDDRPKDL SLREAKFTDSENVQERDADPDTFFAKFTFEYSR  
 Gibbon ECCEKKIPERGQCI INSNKDDRPKDL SLREAKFTDSENVQERDADPDTFFAKFTFEYSR

|                     |                                                              |
|---------------------|--------------------------------------------------------------|
| Rhesus              | -----CLEEVFSNPFDCRFTFEYSR                                    |
| Crab-eating macaque | ECCEKKIPERGQCIINSNKDDRPKDLREAKFTDSENVQERDADPDIFFAKFTFEYSR    |
| Olive baboon        | ECCEKKIPERGQCIINSNKDDRPKDLREAKFTDSENVQERDADPDITFFAKFTFEYSR   |
| Marmoset            | ECCEKKIPERDQCIINSNKDDRPKDLREAKFTDSENVQERDADPDITFFAFAFNFEYSR  |
| Squirrel monkey     | ECCEKKIPERDQCIINSNKDDRPKDLREAGKFTDSENVQERDADPDITFFAFAFNFEYSR |
| Tarsier             | ECCEKKPLERDECIMNTSKEDRTKDLREAKFTDSENVQERDTPDNFFTEFTFEYSR     |
| Mouse lemur         | ECCEKKIPERGECIINSNKDDRPEDL--REAKFTDSETLCQERDTPDNFFAFTFEYSR   |
| Bushbaby            | ECCEKEVPERGECIINSNKDDRPKDLSPGEAKFTDSENVQGRDADPDNFFAFTFEYSR   |
| Chinese tree shrew  | DCCGKKMLER-----FTFEYSR                                       |
| Squirrel            | ECCEKMPEREACIINSNKDGRPQDLSLREAKFTDNENVCQERDTPGNFFAFTFEYSR    |
| Golden hamster      | -----FTDSENVQERDSDNODGLLNEFTFEYSR                            |
| Kangaroo rat        | KCCEKDILECEECIINSNKDDMP--YSLGSKYTGSENVQEKDTPDSFFAE--IYKNSK   |
| Mouse               | VCCEKKTLEREACIINANKDDRPEDLSLREAKFTDSENVQERDSDPKFFAFTFEYSR    |
| Rat                 | ACCEKKPPERADCIINANKDDRPEDLSLREAKFTDSENVQERDSEQDKFFAFTFEYSR   |
| Naked mole rat      | QCCEKKIPEREDCIINLNKDDRPKNVSLTEAKFIHIEHMCQERETDPEHFFAFTFEYSR  |
| Guinea pig          | ECCEKKIPEREDCIINSNKDDRPKNVSLTEAKLTGSEHLQERDTPDNFFAFTFEYSR    |
| Rabbit              | ECCEKKIPERGECIINSNKDDRPKDLREAKLTDNENLCEERDTPDNFFAFTFEYSR     |
| Pika                | ECCEKKIQERGECILNSNKDEKPKYSSREAKFTDNENLCEERDTPDNFFAFTFEYSR    |
| Pig                 | ECCEKKIPERGECIINSNKDDRPNDLSPREAKFTDSENVCEERDADPETFLAFTFEYSR  |
| Alpaca              | GCCEKKIPERGECIINSNKDDRPNDLSPREAKFTDSENVCEERDADRGNFKTEFTFEYSR |
| Bactrian camel      | GCCEKKIPERGECIINSNKDDRPNDLSPREAKFTDSENVCEERDADRGNFKTEFTFEYSR |
| Dolphin             | ECCEKKIPERGECIINSNKDDRPNDLSPREAKFTDSENVCEERDADQENFMAFTFEYSR  |
| Killer whale        | ECCEKKIPERGECIINSNKDDRPNDLSPREAKFTDSENVCEERDADQENFMAFTFEYSR  |
| Cow                 | DCCEKNIPERGECIINSNKDDRPNDLSPREAKFTDSENVCEERDADQANFMAFTFEYSR  |
| Sheep               | DCCEKNIPERGECIINSNKDDRPNDLSPREAKFTDSENVCEERDADQANFMAFTFEYSR  |
| Goat                | DCCEKNIPVREGECIINSNKDDRPNDLSPREAKFTDSENVCEERDADQANFMAFTFEYSR |
| Horse               | DCCEKIPKRGECIINSNKDDRPKDLREAKFTDSENVCEERDADQANFMAFTFEYSR     |
| White rhinoceros    | ECCEKIPKRGECIINSNKDDRPKDLREAKFTDSENVCEERDADQDTFMAFTFEYSR     |
| Cat                 | ECCEKKIPERGECIINSNKDDRPKDLREAKFTDSENVCEERDANQTSFMAFTFEYSR    |
| Dog                 | ECCEKKMPERGECIINSNKDDRPKDLGLREAKFTDSENVCEERDANQTIFFMAFTFEYSR |
| Ferret              | ECCEKKIPERGECIINSNKDDRPEDLALREAKFTDSENVCEERDANQTIFFMAFTFEYSR |
| Panda               | ECCEKKMPERGECIINSNKDDRPKDLALREVKFTDSENVCEERDANQTIFFMAFTFEYSR |
| Pacific walrus      | ECCEKKMPERGECIINSNKDDRPKDLALREVKFTDSENVCEERDANQTIFFMAFTFEYSR |
| Weddell seal        | ECCEKKMPERGECIINSNKDDRPKDLALREVKFTDSENVCEERDANQTIFFMAFTFEYSR |
| Megabat             | ECCEKKIPERGECIINSNKDDRPKDLKTKFTENKNVCEERDADQDIFMAFTFEYSR     |
| Microbat            | ECCEKKIPERGECIINSNKDDRPKDLKTKFTENKNVCEERDADQDIFMAFTFEYSR     |
| Elephant            | ECCE--KNPDLGECIINSNKDDRPKDLKTKFTENKNVCEERDADQDIFMAFTFEYSR    |
| Hyrax               | QCSGK--TSEHHEC-----KEEKPKGLSLREVRFT--KDVQHRDADQENF-----      |
| Tenrec              | ECCDKPILERGDCIIVNLGRDEKPSDLSPREAKFTDSENVQHRDADQENFMIEFTFEYSR |
| Opossum             | DCCQLTIPQGGECIINSNKDDKPEDLSPRAERFTEGDDVQCQLHEDKENFQAKFTFEYSR |
| Tasmanian devil     | DCCQLTIPERGECIINSNKDDKPEDLSPRVERFTEGDDVQCQLHEDKENFLIEFTFEYSR |
| Wallaby             | DCCQLAVP--RGEI-----SLRAEIFTGDDVQCQLHEDKENFLT-----            |
| Platypus            | NCCDKPVPERGECIFRSVREDAPQDLPPTEEFIRAQDVCQRYADKKGDFLDEFVFEYSR  |

|                     |                                                                 |
|---------------------|-----------------------------------------------------------------|
| Human               | RHPDLSIPPELLRIVQIYKDLLRNCNTENPPGCYRYAEDKFNETTEKSLKMVQOQCKHFQ    |
| Chimpanzee          | RHPDLSIPPELLRIVQIYKDLLRNCNTENPPGCYRYAEDKFNETTEKSLKMVQOQCKHFQ    |
| Bonobo              | RHPDLSIPPELLRIVQIYKDLLRNCNTENPPGCYRYAEDKFNETTEKSLKMVQOQCKHFQ    |
| Gorilla             | RHPDLSIPPELLRIVQIYKDLLRNCNTENPPGCYRYAEDKFNETTEKSLKMVQOQCKHFQ    |
| Orangutan           | RHPDLSIPPELLRIVQIYKDLLRNCNTENPPGCYRYAEDKFNETTEKSLKMVQOQCKHFQ    |
| Gibbon              | RHPDLSIPPELLRIVQIYKDLLRNCNTENPPGCYRYAEDKFNETTEKSLKMVQOQCKHFQ    |
| Rhesus              | RHPDLSIPGLLRIVQIYKDLLRNCNTENPPGCYRYAEDKFNETTEKSLKMVQOQCKHFQ     |
| Crab-eating macaque | RHPDLSIPGLLRIVQIYKDLLRNCNTENPPGCYRYAEDKFNETTEKSLKMVQOQCKHFQ     |
| Olive baboon        | RHPDLSIPGLLRIVQIYKDLLRNCNTENPPGCYRYAEDKFNETTEKSLKMVQOQCKHFQ     |
| Marmoset            | RHPDLSIPQLLRVQMYKDLLRNCNTENPPDCYRYAEDKFNEATEKSLKKIQOQCKHFSQ     |
| Squirrel monkey     | RHPDLSIPQLLRVQMYNDLLRNCNTENPPDCYRYAEDKFNETTEKSLKKIQOQCKHFSQ     |
| Tarsier             | RHSDLSIPQLLRITNVYKDLLQNCCKTENPPDCYRYAEDKFNETTEKSLKMVQOQCKRFR    |
| Mouse lemur         | NHPDLSIPPELLRIAHVYKDVLSNCCNTQNPDCYRYAEDKFNETTEKSHKIVQRECEHFQ    |
| Bushbaby            | NHPDLSIPPELLRITHEYKALLTSCNTENPPDCYRYAEDRFFKTTTEKSLKIVQRECEHFQ   |
| Chinese tree shrew  | RHQDLSIPPELLRISQVYEDLLGNCNTENPPDCYRYAEDKFNETTEKSLKIVQOQCKHFSQ   |
| Squirrel            | RHPDLSIPPELLRIARVYEDLLADCCSNTENPPDCYRYAEDKFNETTERSLRMVQOQCEQLQ  |
| Golden hamster      | RHNYLSTPELLRITKMYEDLLEDCCSNTENPPDCYRYAEDKFNETTEKSLAMVQOQCKLFFQ  |
| Kangaroo rat        | RHPDLSASTLLQITKMYEDLLEDCCSNTENPPDCYRYAEDKFNETTERSLAMVQOQCKLFFQ  |
| Mouse               | RHPDLSIPPELLRITKMYEDLLEDCCSNTENPPDCYRYAEDKFNETTERSLAMVQOQCKLFFQ |
| Rat                 | RHTELSTPELLRITKMYEDLLEDCCSNTENPPDCYRYAEDKFNETTERSLAMVQOQCKLFFQ  |
| Naked mole rat      | RHPDLSIPSELLRTAGVSEDFLRDCCSRETLTDCYRYAEDKFNETTERSLAMVQOQCKLFFQ  |

Guinea pig RHPDLSTSELLRITGVYEDFLGDCCSRETPTDCYRHVEGKFNETTGKSLQIVQOQECKHFQ  
Rabbit RHQDLSIVELLRIAIEVYKNLMENCCSTENPLNCYHSVEEKFNETTEKSLKMVQOQECKRFQ  
Pika RHPHLSILELLRIAIEVYEDVIENCCNTEHPPSCYHNVEDKFNETTEKSLKMVQOQECKRFQ  
Pig RHPDELSTPELLRIAIEVYEDLLRECCNSQTPPDCYKDAEKKFNETTEKSLKIVQRECEHFQ  
Alpaca RHTELSIPPELLRIAETIEDLLGECCNTENPPDCYRDAENRFNETTEKSLKIVQOQECEHFQ  
Bactrian camel RHTELSIPPELLRIAETIEDLLGECCNTENPPDCYRDAENRFNETTEKSLKIVQOQECEHFQ  
Dolphin RHPDELSTPELLRIAIEVYEDLLRECCNTENPPDCYRHAENKFNETTEKSLKIVQRECEHFQ  
Killer whale RHPDELSTPELLRIAIEVYEDLLRECCNTENPPDCYRHAENKFNETTEKSLKIVQRECEHFQ  
Cow RHPDELSTPELLRIAKVYKDLLKECCNMENPPECYRHAENRFNETTEKSLKIVQRECEHFQ  
Sheep RHPDELSTPELLRIAKVYEDLLKECCNMENPPECYRRAENRFNETTEKSLKIVQRECEHFQ  
Goat RHPDELSTPELLRIAKVYEDLLKECCNMENPPECYRRAENRFNETTEKSLKIVQRECEHFQ  
Horse RHPDELSTPELLRIARVYEDLLECCSTENPPDCYGNAEYKFNETTQORSLKIVQRECEHFQ  
White rhinoceros RHPDELSTSELLRIARVYKDLLLECCSTENPPDCYGNAEYKFNETTQORSLKIVQRECEHLQ  
Cat RHPDELSTPELLRIAIEVYEDLLKECCNTENPPDCYRHAENRFNETTEKSLKIVQRECEHSQ  
Dog RHPDELSTPELLRIAIEVYEDLLKECCNTENPPDCYRRAEYKFNETTEKSLKIVQRECEHFQ  
Ferret RHLELSVPELLRIAIEVYEDLLKECCNTENPPDCYRHAENRFNETTEKSLKIVQRECEHFQ  
Panda RHPDELSTPELLRIAIEVYEDLLKECCNTENPPDCYRRAENKFNETTEKSLKIVQRECEHFQ  
Pacific walrus RHPDELSTPELLRIAIEVYEDLLKECCNTENPPDCYRHAENRFNETTEKSLKIVQRECAHFQ  
Weddell seal RHPDELSTPELLRIAIEVYEDLLKECCNTENPPDCYRHAENRFNETTEKSLKIVQRECEHFQ  
Megabat RHPDELSTPELLRIASVYDILLKECCNTENPPDCYRHAENRFNETTEKSLRIVQRECEHFR  
Microbat RHQELSTPELLRIARVYDILLRECCNAENPPDCYSTMENKFNETTEKSLKIVQRECEHFQ  
Elephant RH-DLSTPEYLR-----LLECCCKREKTSDCYGHAEKSN-TTEESLEMVKECEHFQ  
Hyrax -----  
Tenrec RHQDLSPEILRIGEVYENLLDCCCKENPSCYSHAGEKFNYYTTEKSLQMPQDFEALQ  
Opossum RHPDELPSVLLRIGVYENLLECCCKTENPKECYQAEHEEFQKI IAKSWTLVKTECYFYQ  
Tasmanian devil QHLELPHSVLLRIAVIYEELLEKCCCKTENPKECYSHGEEFLNITMKTHAVAKLQCDFFQ  
Wallaby -----  
Platypus KHQKVSQVPIRRVLEKYQDLEKCCQADPHQCYSRGEEEFQKILQESQARVQEDCAHFQ

Human NLGKDGLKYHYLIRLTKIAPQLSTEELVSLGKEMVTAFTTCCTLSEEFACVDNLADLVFG  
Chimpanzee NLGKDGLKYHYLIRLTKIAPQLSTEELVSLGKEMVTAFTTCCTLSEEFACVDNLADLVFG  
Bonobo NLGKDGLKYHYLIRLTKIAPQLSTEELVSLGKEMVTAFTTCCTLSEEFACVDNLADLVFG  
Gorilla NLGKDGLKYHYLIRLTKIAPQLSTEELVSLGKEMVTAFTTCCTLSEEFACVDNLADLVFG  
Orangutan NLGKDGLKYHYLIRLTKIAPQLSTEELVSLGKEMVTAFTTCCTLSEEFACVDNLADLVFG  
Gibbon NLGKDGLKYHYLIRLTKIAPQLSTEELVSLGKEMVTAFTTCCTLSEEFACVDNLADLVFG  
Rhesus NLGKDGLTYQYLIRLTKIAPQLSSEELVSLGKEMVTAFTTCCTLSEEFACVDNLADLVG  
Crab-eating macaque NLGKDGLTYQYLIRLTKIAPQLSSEELVSLGKEMVTAFTTCCTLSEEFACVDNLADLVG  
Olive baboon NLGKDGLTYQYLIRLTKIAPQLSSEELVSLGKEMVTAFTTCCTLSEEFACVDNLADLVG  
Marmoset NLGKDGLKYHYLIRFTKIAPQLSTEELVSLGKEMVTVFTTCCTLSEEFACVDNLADLVG  
Squirrel monkey NLGKDGLKYHYLIRLTKIAPQLSTEELVSLGKEMVTVFTTCCTLSEEFACVDNLADLVG  
Tarsier NLGKDGLKYHYLSLTKIAPQLSTEELVSLGKEMVTVFTTCCTLSEEFACVDNLADLVG  
Mouse lemur LWGKDGKYYLIRLTKIAPQLSTEELISLGKEMAMALATCCTLSEEFACVDNLADLVG  
Bushbaby NWGENGLKYR-L-KITS-GFQLS-----VLDLVG  
Chinese tree shrew NLGKEDLKYHLLIRMTKVPQLSTEELIFLGKEMVTVLTTCTQSEEFACVDNLADLVG  
Squirrel NLGKDGLKYHSLIELTKIAPQLSTEELISLGKEMVIALTTCTLSEEFACVDNLADLVG  
Golden hamster GLEKDALLLHYLVKFTKAAPQLSLEELIYLSKGMTEALTTCTLSEEFACVDNLADLVG  
Kangaroo rat -----SIIKLTKIAPQLPTEQLVYL-----ITTCCTLS--FACVANWADPVLG  
Mouse ELGKDTLQRHFLVKFTKAAPQLPMEELVSLSKEMVAALTTCTLSEEFACVDNLADLVG  
Rat ELGKDALQRHFLVKFTKAAPQLPMEELVSLSKEMVAALATCCTLSEEFACVDNLADLVG  
Naked mole rat NLGKDGLKHHYLIKLTKIAPQLSTEELISLGKEMVIALTTCTLSEEFACVDNLADLVG  
Guinea pig NLGEDGLKYHYLIKLTKIAPQLSTEELISLGKEMVIALTTCTLSEEFACVDNLADLVG  
Rabbit NLGKDGLKYHYLIKLTKIAPQLSTEELISLGKEMVIALTTCTLSEEFACVDNLADLVG  
Pika NLGKDGLAYYYLIKLTKSAPQLPTEELISLGKETVIALTTCTLSEEFACVDNLADLVG  
Pig NLGKDDLKYHYLARLTKIAPQLSDELTFGLGKEMIALATCCTLSEEFACVDNLADLVG  
Alpaca NLGKDDLKYHYLIKLTKIAPQLSTEELTFGLGKEMIALTTCTLSEEFACVDNLADLVG  
Bactrian camel NLGKDDLKYHYLIKLTKIAPQLSTEELTFGLGKEMIALTTCTLSEEFACVDNLADLVG  
Dolphin ISGKDDLKYHYLINLTKLAPQLSTEELTFGLGKEMVIALTTCTLSEEFACVDNLADLVG  
Killer whale ISGKDDLKYHYLINLTKLAPQLSTEELTFGLGKEMVIALTTCTLSEEFACVDNLADLVG  
Cow NLGKDDLKYHYLINLTKLAPQLSTEELTFGLGKEMVIALTTCTLSEEFACVDNLADLVG  
Sheep NLGKDDLKYHYLINLTKLAPQLSTEELTFGLGKEMVIALTTCTLSEEFACVDNLADLVG  
Goat NLGKDDLKYHYLINLTKLAPQLSTEELTFGLGKEMVIALTTCTLSEEFACVDNLADLVG  
Horse NLGKDDLKYHYLIKLTKIAPQLSTEELTFGLGKEMVIALTTCTLSEEFACVDNLADLVG  
White rhinoceros NLGKDGLKYHYLIKLTKIAPQLSTEELTFGLGKEMVIALTTCTLSEEFACVDNLADLVG  
Cat NLGKEDLKYHYLIKLTKIAPQLSTEELTFGLGKEMVIALTTCTLSEEFACVDNLADLVG  
Dog NLGKDDLKYHYLIKLTKIAPQLSTEELTFGLGKEMVIALTTCTLSEEFACVDNLADLVG



|                 |                                                               |
|-----------------|---------------------------------------------------------------|
| Ferret          | NLGKDDLKYYYLIKLTKIAPQLSTEELTFLGKEMVTALATCCTLSEEFACVDNLMDLVLG  |
| Panda           | NLGKDDLKHYIYLIKLTKIAPQLSTEELTFLGKEMVTALATCCTLSEEFACVDNLMDLVLG |
| Pacific walrus  | DLGKDDLKYYYLIKFTKIAPQVSTEELTFLGKEMVTALATCCTLSEEFACVDNLMDLVLG  |
| Weddell seal    | NLGKDDLKYYYLIKLTKIAPQLSTEELTFLGKEMVTALATCCTLSEEFACVDNLMDLVLG  |
| Megabat         | NLGKDDLKHYIYLIKLTKIAPQLSTEELTFIGEEMVTALATCCTLSEEFACVDNLAKLIFG |
| Microbat        | NLREDVLKY-----                                                |
| Elephant        | -----                                                         |
| Hyrax           | -----FACVDHLAKLFLG                                            |
| Tenrec          | NLWKEDLKYYHHLVKVKKMTHQVSTKKLSLFSKDEPALAMCCAQSEEFACMDNLMNLVLG  |
| Opossum         | NLGEEGFLNQCLLPLTKKAPQLPPQELISHSKLASFFAKCCPLGEEFACVDNAVSLTIG   |
| Tasmanian devil | QLGEEGFFTQCLLFLTKKAPQLSSQELISHSQKLVTSFSKCCFLKEEFACVDNLAGLVLG  |
| Wallaby         | -----CLLVLTKRAPQLPPQELISQMOKFHASFTKCCPLGEEFARVHH-VHLILG       |
| Platypus        | KLGEDLYRQKYAISFTKQAPLPLTELTVHVERKTNDAAHCCMQPDETACIERSANLLYG   |

|                     |                                                                |
|---------------------|----------------------------------------------------------------|
| Human               | ELCGVNEENRTINPAVDHCCKTNFAFRRPCFESLKADKTYVPPPPFSQDLFTFHADMCQSQN |
| Chimpanzee          | ELCGVNEENRTINPAVDHCCKTNFAFRRPCFESLKADKTYVPPPPFSQDLFTFHADMCQSQN |
| Bonobo              | ELCGVNEENRTINPAVDHCCKTNFAFRRPCFESLKADKTYVPPPPFSQDLFTFHADMCQSQN |
| Gorilla             | ELCGVNEENRTINPAVDHCCKTNFAFRRPCFESLKADKTYVPPPPFSQDLFTFHADMCQSQN |
| Orangutan           | ELCGVNEENRTINPAADHCCKTFAFRRPCFESLKADKTYVPPPPFSQDLFTFHADMCQSQN  |
| Gibbon              | ELCGVNEENRTINPAVDHCCKTNFAFRRPCFESLKADKTYVPPPLSQDIFTFHADMCQSQN  |
| Rhesus              | ELCGVNEENRTINPAVDHCCKTNFAFRRPCFESLKADKTYVPPPPFSQDLFTFHADMCQSQN |
| Crab-eating macaque | ELCGVNEENRTINPAVDHCCKTNFAFRRPCFESLKADKTYVPPPPFSQDLFTFHADMCQSQN |
| Olive baboon        | ELCGVNEENRTINPAVDHCCKTNFAFRRPCFESLKADKTYVPPPPFSQDLFTFHADMCQSQN |
| Marmoset            | ELCGVNEENRTINPAVDHCCKSNAFRRPCFESLTHKTYVPPPPFSQDLFTFHADMCQSQN   |
| Squirrel monkey     | ELCGVNEENRTINPAVDHCCKSNAFRRPCFESLTAHKTYYVPPPPFSQDLFTFHADMCQSQN |
| Tarsier             | ELCGVNLNRTINPAVDRCCRTNFAFRTPCFKDLKTDKTYVPPPTSQDLFTFHADLCAQON   |
| Mouse lemur         | ELCGINENRTINPAVDHCCKTNFAFRRHCFEGLKADETYVPPPTTKDLFTFNADLCAQON   |
| Bushbaby            | ELCGVHKNRTINPAVDHCCRTNFAFRRYCFEGLEVDTTYVPPPTSKDLFTFPADLCAQAN   |
| Chinese tree shrew  | EFCGINKNRTINPAVDHCCLTNFAFRRHCFESLEADKTYVPPPTSRLDIFHTDLCQAPN    |
| Squirrel            | ELCGINKNRTINPAVDHCCKANFAFRRLCFKELKGDEMYEPPS-SQGFFTSCVDWCQAOQ   |
| Golden hamster      | DLCGVNEENRTINPAVDHCCRTNFAFRRHCFEHLKADKTYVPPPLSVALISALRSDMCHN   |
| Kangaroo rat        | ELCGINENQTINPAVDHCCKANFAFRRHCFEGLEADKMYVPPPLVSEDSFAFHDEWCMQON  |
| Mouse               | ELCGVNTNRTINPAVDHCCKTDFAFRRHCFEHLKADTTYELPSVSALVSALHTDWCQPRK   |
| Rat                 | ELCGINKNRTINPTVDHCCRADFAFRPCFHEHLKADTTYALPSVSALVSALRADWCQPLK   |
| Naked mole rat      | ELCGINENQTINPAMDHCC--NFAFRRHCFEGLKADKTYVPPPLSQDLVFPVWDWCQSQN   |
| Guinea pig          | ELCGINENRTINPAVDHCCANFAFRPCFESLKPDKTYIPPLSQDLVFPVWDWCQSQN      |
| Rabbit              | ELCGIKENRTINPAVDHCCQTNFAFRPCFEGLEADKTYVPPPTSQDLVFPVWDWCQDQK    |
| Pika                | DLCGVNEENRTINPAVGRCCQTSFAFRPCLEGLEADPTYVPPPIVQDVFAFRADWCQTQD   |
| Pig                 | ELCGINKNRSINPTVDHCCKTNFAFRSCFEGLEADKTYVPLPPSQGLFTFPDLCAQAHN    |
| Alpaca              | QLCGINENRNINPAVDHCCKTNFAFRSCFEGLEADKAYVPLPTSQGLFTFHADLCAQAHN   |
| Bactrian camel      | ELCGINEYHNINPAVDHCCKTNFAFRSCFEGLEADKAYVPPPTSQGLFTFHADLCAQAHN   |
| Dolphin             | ELCGINENRSINPAVDHCCKTNFAFRSCFEGLEADKTYVPPPTSQGLFTFHADLCAQAHN   |
| Killer whale        | ELCGINENRSINPAVDHCCKTNFAFRSCFEGLEADKTYVPPPTSQGLFTFHADLCAQAHN   |
| Cow                 | ELCGINENRNINPAVDHCCKTNFAFRSCFESLEADKTYVPPPTSQGLFTFHADLCAQAHN   |
| Sheep               | ELCGINENRNINPAVDHCCKTNFAFRSCFESLEADKTYVPPPTSQGLFTFHADLCAQAHN   |
| Goat                | ELCGINENRNINPAVDHCCKTNFAFRSCFESLEADKTYVPPPTSQGLFTFHADLCAQAHN   |
| Horse               | ELCGINENRSINPAVDHCCKTDFAFRRPCFEGLEADKTYVPPPTSQGLFTFHADWCQAHK   |
| White rhinoceros    | ELCGINENRSINPAVDHCCKTDFAFRRPCFEGLEADKTYVPPPTSQGLFTFHADLCAQAHK  |
| Cat                 | ELCGINENRNINPDVDHCCKTNFAFRSCFEGLEADKAYVPPSTFQGLFTFHADLCAQAHK   |
| Dog                 | ELCGINENRNINPDVDHCCKTNFAFRPCFEGLEADKTYVPPPTSQDLFTFHADLCAQAHN   |
| Ferret              | ELCGLNENRNINPDVDHCCKTNFAFRPCFEGLEADKTYKPPCTPQDLFVVFHTDLCQSHN   |
| Panda               | ELCGINENRNINPDVDHCCKTNFAFRPCFEGLEADKTYVPPPTSQDLFTFHADLCAQAHN   |
| Pacific walrus      | ELCGINENRNINPDVDHCCKTNFAFRPCFEGLEADKTYVPPSTPQDLFTFHADLCAQAHN   |
| Weddell seal        | ELCGINENRDINPDVDHCCKTNFAFRPCFEGLEADKTYVPPSTPQDLFTFHADLCAQAHN   |
| Megabat             | ALCRRHEAEPINDGVGHCCDSSYAFRKPCFDDLHVDRTYISPPLSCDLSALE-ELCKAE-   |
| Microbat            | EICGVNGNRTINPAVDHCCKTNFAFRRHCFEALADKTYVPPSASQGLFTFHADLCAQAHN   |
| Elephant            | -----                                                          |
| Hyrax               | VLCRRHEAKPINAGVGHCCDASYAFRKPCFDDLSADETYIAPSLSCDVISLKEDLCKPQE   |
| Tenrec              | ELCGVIRNPTVNRAVDQCSKSHFAFRG-CLENLKQDGKVVPPSTTQGWSTFH-DWYQAQN   |
| Opossum             | ELCGINRNRTINPGVNDCCSSYAFSSMCFKDLTDETYTSPFTFLPELFTFNLTLCQK-     |
| Tasmanian devil     | ELCGINKNRTINPTVDNCCASSYAFRPLCFNDLPEDETYTTPFTFLPEMFTFNLTLCQ-E-  |
| Wallaby             | EICGVNKN-TINPNVDNCCSSLVFRSWCFNLLTADETFIPPTFTPEVFTFNITLCQ-K-    |
| Platypus            | QICGFFANRSINPGVTNCCS-FAFKEPCFPSLVDETYTPPAFSPFLFTPNEDWCQLPD     |

|                     |                                                               |
|---------------------|---------------------------------------------------------------|
| Human               | EELQRKTTDRFLVNLVVKLKHELTDEELQSLFTNFANVVDKCKCAESPEVCFNEESPKIGN |
| Chimpanzee          | EELQRKTTDRFLVNLVVKLKHELTDEELQSLFTNFANVVDKCKCAESPEVCFNEESPKIGN |
| Bonobo              | EELQRKTTDRFLVNLVVKLKHELTDEELQSLFTNFANVVDKCKCAESPEVCFNEESPKIGN |
| Gorilla             | EELQRKTTDRFLVNLVVKLKHELTDEELQSLFTNFANVVDKCKCAESPEVCFNEESPKIGN |
| Orangutan           | EELQRKTTDRFLVNLVVKLKHELTDEELQSLFTNFANVVDKCKCAESPEVCFNEESPKIGN |
| Gibbon              | EELQRKTTDRFLVNLVVKLKHELTDEELQSLFTNFANVVDKCKCAESPEVCFNEESPKIGN |
| Rhesus              | EELQRKTTDRFLVNLVVKLKHELTDEELQSLFTNFANVVDKCKCAESPEVCFNEESPKIGN |
| Crab-eating macaque | EELQRKTTDRFLVNLVVKLKHELTDEELQSLFTNFANVVDKCKCAESPEVCFNEESPKIGN |
| Olive baboon        | EELQRKTTDRFLVNLVVKLKHELTDEELQSLFTNFANVVDKCKCAESPEVCFNEESPKIGN |
| Marmoset            | EELQKTTDRFLVNLVVKLYEVANEELQSLFTNFANVVDKCKCAESPEVCFNEESPKIGN   |
| Squirrel monkey     | EELQKTTDRFLVNLVVKLYEVANEELQSLFTNFANVVDKCKCAESPEVCFNEESPKIGN   |
| Tarsier             | EELQRKKDRFLVNLVVKRKPGLTDEELQSLFTNFANVVDKCKCAESPEVCFNEESPKIGN  |
| Mouse lemur         | EELQRKKDRFLVNLVVKRKPGLTDEELQSLFTNFANVVDKCKCAESPEVCFNEESPKIGN  |
| Bushbaby            | EELQRKKDRFLVNLVVKRKPGLTDEELQSLFTNFANVVDKCKCAESPEVCFNEESPKIGN  |
| Chinese tree shrew  | EELQKTTDRFLVNLVVKLYEVANEELQSLFTNFANVVDKCKCAESPEVCFNEESPKIGN   |
| Squirrel            | EELQKTTDRFLVNLVVKLYEVANEELQSLFTNFANVVDKCKCAESPEVCFNEESPKIGN   |
| Golden hamster      | EDLQNKHRFLVNLVVKWMPFITAKERLCLFTKFTAVGEEKCEEVQEPETCFRPDPGTVP   |
| Kangaroo rat        | EELQSMKNRFLIDLVKWKPALTDQEKLRSLF-----                          |
| Mouse               | EDLQNKHRFLVNLVVKWMPFITDEERLCLFTKFTAAAREECSEVQEPESCFSPESSKTG-  |
| Rat                 | EDLQNKHRFLVNLVVKWMPFITDEERLCLFTKFTAAAREECSEVQEPESCFSPESSKTG-  |
| Naked mole rat      | EVPQGGKYRFLIKLVRLKPLTDEELLSLLTNFTSAVEKCKVPEPEACFHEE-----      |
| Guinea pig          | EELQKTKYRFLIKLVRLKPLTDEELLSLLTNFTSAVEKCKVPEPEACFHEE-----      |
| Rabbit              | EELQRKKDRFLVNLVVKLPELANQEVQSLFINFTDTLEKCCNAKPEACFNQERPKIGS    |
| Pika                | EELQRKKDRFLVNLVVKLPELANQEVQSLFINFTDTLEKCCNAKPEACFNQERPKIGS    |
| Pig                 | EELQRKKDRFLVNLVVKLPELANQEVQSLFINFTDTLEKCCNAKPEACFNQERPKIGS    |
| Alpaca              | EELQRKKDRFLVNLVVKLPELANQEVQSLFINFTDTLEKCCNAKPEACFNQERPKIGS    |
| Bactrian camel      | EELQRKKDRFLVNLVVKLPELANQEVQSLFINFTDTLEKCCNAKPEACFNQERPKIGS    |
| Dolphin             | EELQRKKDRFLVNLVVKLPELANQEVQSLFINFTDTLEKCCNAKPEACFNQERPKIGS    |
| Killer whale        | EELQRKKDRFLVNLVVKLPELANQEVQSLFINFTDTLEKCCNAKPEACFNQERPKIGS    |
| Cow                 | EELQRKKDRFLVNLVVKLPELANQEVQSLFINFTDTLEKCCNAKPEACFNQERPKIGS    |
| Sheep               | EELQRKKDRFLVNLVVKLPELANQEVQSLFINFTDTLEKCCNAKPEACFNQERPKIGS    |
| Goat                | EELQRKKDRFLVNLVVKLPELANQEVQSLFINFTDTLEKCCNAKPEACFNQERPKIGS    |
| Horse               | EELQRKKDRFLVNLVVKLPELANQEVQSLFINFTDTLEKCCNAKPEACFNQERPKIGS    |
| White rhinoceros    | EELQRKKDRFLVNLVVKLPELANQEVQSLFINFTDTLEKCCNAKPEACFNQERPKIGS    |
| Cat                 | EELQRKKDRFLVNLVVKLPELANQEVQSLFINFTDTLEKCCNAKPEACFNQERPKIGS    |
| Dog                 | EELQRKKDRFLVNLVVKLPELANQEVQSLFINFTDTLEKCCNAKPEACFNQERPKIGS    |
| Ferret              | EELQRKKDRFLVNLVVKLPELANQEVQSLFINFTDTLEKCCNAKPEACFNQERPKIGS    |
| Panda               | EELQRKKDRFLVNLVVKLPELANQEVQSLFINFTDTLEKCCNAKPEACFNQERPKIGS    |
| Pacific walrus      | EELQKTKYRFLIKLVRLKPLTDEELLSLLTNFTSAVEKCKVPEPEACFHEE-----      |
| Weddell seal        | EELQKTKYRFLIKLVRLKPLTDEELLSLLTNFTSAVEKCKVPEPEACFHEE-----      |
| Megabat             | EEFQ--TEKFLVNLVVKLPELANQEVQSLFINFTDTLEKCCNAKPEACFNQERPKIGS    |
| Microbat            | EELQRKKDRFLVNLVVKLPELANQEVQSLFINFTDTLEKCCNAKPEACFNQERPKIGS    |
| Elephant            | -----                                                         |
| Hyrax               | DKLQSKAE-FLVELVVKLMPHPT-EELWSLITDFTNVLEKCKLEGPEASFSDE-----    |
| Tenrec              | GALQSKKERLFRVSVKMKSORPD-ELPSWLTAFAPGVNRCGE-EGPEPCFNEECPTGSQ   |
| Opossum             | EEQKKRRELMVHLLQKPHLQVQVMPPLSDFSKMTD-CCEVEEKETCFKEEHSKLYN      |
| Tasmanian devil     | MELQRKKRELIVNLVVRQKPVLETQVQVMQMSDFPTLIN-CCKTEERESCFCKEEHSKLYN |
| Wallaby             | TEQQRKR-MLIMNLVVKQPLLAQVIVQLLDFS-----CCEAEERVTCFKEE-----      |
| Platypus            | MELQRKKKLLINLVKHKPQTPDDQLQALTDFSDVVKCCQASGPGACFVAEGPNLIA      |

**Legend:**

■ : Positively selected site in the whole phylogeny

■ : Lineage-specific positively selected site

**Table S1. List of mammalian species.**

| <b>Common name</b>     | <b>Scientific name</b>            |
|------------------------|-----------------------------------|
| Alpaca                 | <i>Vicugna pacos</i>              |
| Armadillo              | <i>Dasypus novemcinctus</i>       |
| Bactrian camel         | <i>Camelus ferus</i>              |
| Black flying fox       | <i>Pteropus alecto</i>            |
| Bonobo                 | <i>Pan paniscus</i>               |
| Bushbaby               | <i>Otolemur garnettii</i>         |
| Cape golden mole       | <i>Chrysochloris asiatica</i>     |
| Cat                    | <i>Felis catus</i>                |
| Chimpanzee             | <i>Pan troglodytes</i>            |
| Cow                    | <i>Bos taurus</i>                 |
| Crab-eating macaque    | <i>Macaca fascicularis</i>        |
| Dog                    | <i>Canis lupus familiaris</i>     |
| Dolphin                | <i>Tursiops truncatus</i>         |
| Elephant               | <i>Loxodonta africana</i>         |
| Ferret                 | <i>Mustela putorius furo</i>      |
| Gibbon                 | <i>Nomascus leucogenys</i>        |
| Goat                   | <i>Capra hircus</i>               |
| Golden hamster         | <i>Mesocricetus auratus</i>       |
| Gorilla                | <i>Gorilla gorilla</i>            |
| Ground squirrel        | <i>Spermophilus citellus</i>      |
| Guinea Pig             | <i>Cavia porcellus</i>            |
| Hedgehog               | <i>Erinaceus europaeus</i>        |
| Horse                  | <i>Equus caballus</i>             |
| Human                  | <i>Homo sapiens</i>               |
| Hyrax                  | <i>Procavia capensis</i>          |
| Kangaroo rat           | <i>Dipodomys ordii</i>            |
| Killer whale           | <i>Orcinus orca</i>               |
| Lesser hedgehog tenrec | <i>Echinops telfairi</i>          |
| Manatee                | <i>Trichechus inunguis</i>        |
| Marmoset               | <i>Callithrix jacchus</i>         |
| Megabat                | <i>Pteropus vampyrus</i>          |
| Microbat               | <i>Myotis lucifugus</i>           |
| David's Myotis         | <i>Myotis davidii</i>             |
| Mouse                  | <i>Mus musculus</i>               |
| Mouse Lemur            | <i>Microcebus murinus</i>         |
| Naked mole rat         | <i>Heterocephalus glaber</i>      |
| Olive Baboon           | <i>Papio anubis</i>               |
| Opossum                | <i>Monodelphis domestica</i>      |
| Orangutan              | <i>Pongo abelii</i>               |
| Panda                  | <i>Ailuropoda melanoleuca</i>     |
| Pig                    | <i>Sus scrofa</i>                 |
| Pika                   | <i>Ochotona princeps</i>          |
| Platypus               | <i>Ornithorhynchus anatinus</i>   |
| Rabbit                 | <i>Oryctolagus cuniculus</i>      |
| Rat                    | <i>Rattus norvegicus</i>          |
| Rhesus macaque         | <i>Macaca mulatta</i>             |
| Rhinoceros             | <i>Ceratotherium simum</i>        |
| Sheep                  | <i>Ovis aries</i>                 |
| Shrew                  | <i>Sorex araneus</i>              |
| Sloth                  | <i>Choloepus hoffmanni</i>        |
| Squirrel               | <i>Ictidomys tridecemlineatus</i> |
| Squirrel monkey        | <i>Saimiri boliviensis</i>        |
| Star-nosed mole        | <i>Condylura cristata</i>         |
| Tarsier                | <i>Tarsius syrichta</i>           |
| Tasmanian devil        | <i>Sarcophilus harrisii</i>       |
| Tree Shrew             | <i>Tupaia belangeri</i>           |
| Wallaby                | <i>Macropus eugenii</i>           |
| Walrus                 | <i>Odobenus rosmarus</i>          |
| Weddell seal           | <i>Leptonychotes weddellii</i>    |

**Table S2. Positively selected sites in the human and chimpanzee lineages.**

| Gene       | Lineage    | Codon | Ancestral AA | Human/chimpanzee AA | Pr <sup>a</sup> | Other methods <sup>b</sup> |
|------------|------------|-------|--------------|---------------------|-----------------|----------------------------|
| <i>ALB</i> | Human      | 183   | Glu          | Lvs                 | 0.765           |                            |
|            |            | 314   | Leu          | Ile                 | 0.776           | MEME                       |
|            | Chimpanzee | 49    | Ile          | Val                 | 0.764           |                            |
|            |            | 107   | Thr          | Lys                 | 0.950           | MEME-BEB                   |
|            |            | 156   | Glu          | Gly                 | 0.913           | MEME-BEB                   |
|            | 166        | Ile   | Val          | 0.908               | MEME            |                            |
| <i>AFP</i> | Human      | 42    | Asn          | Ser                 | 0.875           | MEME                       |
|            |            | 44    | Thr          | Ala                 | 0.873           | MEME                       |
|            | Chimpanzee | 100   | His          | Arg                 | 0.842           |                            |
| <i>AFM</i> | Human      | 29    | Val          | Ile                 | 0.777           |                            |
|            |            | 183   | Ala          | Val                 | 0.876           |                            |
|            |            | 202   | Phe          | Leu                 | 0.887           | MEME                       |
|            | Chimpanzee | 200   | Phe          | Leu                 | 0.829           |                            |
|            |            | 241   | Gln          | His                 | 0.906           |                            |

<sup>a</sup> Posterior probability of  $\gamma > 1$  as detected by gammaMap.

<sup>b</sup> Other methods that identified the same codon as positively selected

**Table S3. Nucleotide diversity and Tajima's D for the albuminoid genes.**

| Gene | Population | S <sup>a</sup> | $\Theta_w$ ( $\times 10^{-4}$ ) |                   | $\Pi$ ( $\times 10^{-4}$ ) |                   | Tajima's D |                   |
|------|------------|----------------|---------------------------------|-------------------|----------------------------|-------------------|------------|-------------------|
|      |            |                | value                           | rank <sup>b</sup> | value                      | rank <sup>b</sup> | value      | rank <sup>b</sup> |
| GC   | YRI        | 244            | 7.15                            | 0.63              | 7.72                       | 0.63              | 0.26       | 0.54              |
|      | CEU        | 142            | 4.15                            | 0.41              | 4.23                       | 0.32              | 0.07       | 0.26              |
|      | CHBJPT     | 122            | 3.57                            | 0.52              | 5.77                       | 0.61              | 2.02       | 0.77              |
| ALB  | YRI        | 45             | 4.91                            | 0.25              | 5.94                       | 0.39              | 0.65       | 0.76              |
|      | CEU        | 32             | 3.48                            | 0.26              | 5.57                       | 0.51              | 1.81       | 0.89              |
|      | CHBJPT     | 28             | 3.04                            | 0.39              | 5.67                       | 0.60              | 2.55       | 0.91              |
| AFP  | YRI        | 90             | 7.57                            | 0.69              | 7.02                       | 0.54              | -0.23      | 0.25              |
|      | CEU        | 57             | 4.78                            | 0.56              | 4.52                       | 0.36              | -0.17      | 0.20              |
|      | CHBJPT     | 32             | 2.68                            | 0.30              | 4.73                       | 0.47              | 2.29       | 0.85              |
| AFM  | YRI        | 63             | 6.03                            | 0.44              | 5.85                       | 0.38              | -0.09      | 0.33              |
|      | CEU        | 36             | 3.43                            | 0.26              | 4.92                       | 0.42              | 1.31       | 0.73              |
|      | CHBJPT     | 22             | 2.10                            | 0.17              | 3.66                       | 0.32              | 2.13       | 0.80              |

<sup>a</sup> Number of segregating sites

<sup>b</sup> percentile rank relative to a distribution of ~3000 randomly selected genes

**Table S4. Variant vitamin D-binding proteins.**

| Variant Name | rs4588  | rs7041  | Frequency |      |        |
|--------------|---------|---------|-----------|------|--------|
|              |         |         | YRI       | CEU  | CHBJPT |
| GC*1F        | Thr (C) | Asp (T) | 0.89      | 0.22 | 0.50   |
| GC*1S        | Thr (C) | Glu (G) | 0.08      | 0.58 | 0.25   |
| GC2          | Lys (A) | Asp (T) | 0.03      | 0.20 | 0.25   |
